# Supplementary material
Source: publisher figshare collection journal article supplement (https://acs.figshare.com/ndownloader/files/9045070)

# **Palladium-Catalyzed Direct C-H trifluoroethylation of aromatic amides\*\***

*Manikantha Maraswami, Sreekumar Pankajakshan, Chen Gang, Teck-Peng Loh\**

## **Content**

|                                                                           |       |
|---------------------------------------------------------------------------|-------|
| General methods                                                           | 3     |
| Preparation of starting materials                                         | 3-4   |
| Optimization of reaction condition                                        | 4-7   |
| General procedure for trifluoroethylation of arenes and the spectral data | 7-20  |
| Mechanistic studies                                                       | 20-22 |
| NMR Spectra                                                               | 23-78 |

## I. General Methods

Unless otherwise stated, all commercial reagents and solvents were used without additional purification. Analytical thin layer chromatography (TLC) was performed on pre-coated silica gel 60 F254 plates. Visualization on TLC was achieved by the use of UV light (254 nm). Column chromatography was undertaken on silica gel (400-630 mesh) using a proper eluent system.  $^1\text{H}$  NMR was recorded on Bruker Avance 400 MHz. Chemical shifts were quoted in parts per million (ppm) referenced to the appropriate solvent peak or 0.0 ppm for tetramethylsilane. The following abbreviations were used to describe peak splitting patterns when appropriate: br = broad, s = singlet, d = doublet, t = triplet, q = quartet, dd = doublet of doublet, td = triplet of doublet, ddd = doublet of doublet of doublet, m = multiplet. Coupling constants,  $J$ , were reported in hertz unit (Hz).  $^{13}\text{C}$  NMR was recorded on Bruker Avance 400 MHz (100 MHz) and was fully decoupled by broad band proton decoupling. Chemical shifts were reported in ppm referenced to the center of a triplet at 77.0 ppm of chloroform- $d$ . High resolution mass spectra were obtained on Waters Q-Tof Premier Spectrometer. Palladium acetate (98%) was purchased from Strem Chemicals Co., Ltd. Other reagents or catalysts were directly used from purchased without further purification unless otherwise specified.

## II. General Procedure for the Preparation of Starting Materials

### II-1. Mesityl(2,2,2-trifluoroethyl)iodonium trifluoromethanesulfonate (2)

**2** was prepared following the procedure of previous literature.<sup>1</sup>

### II-2. Preparation of arene substrates

#### II-2-1. Procedure for the synthesis of N-methyl benzamides<sup>2</sup>

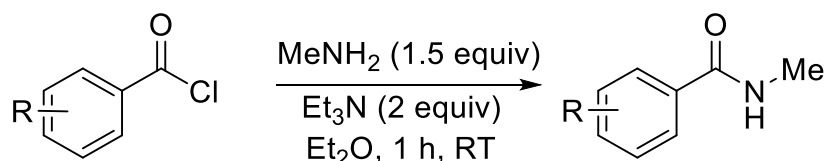

MeNH<sub>2</sub> methanol solution (33.3%) (1.5 equiv.), acid chloride (1.0 equiv.), Et<sub>3</sub>N (2.0 equiv.) and Et<sub>2</sub>O (0.5 M) were added into a round bottom flask capped with a septum. The mixture was stirred at room temperature. After 1 h, the crude reaction mixture was extracted with Et<sub>2</sub>O, purified by flash chromatography to get the corresponding N-methyl benzamides.

#### II-2-2. Preparation of additional arene substrates

<sup>1</sup> Toth, L. B.; Kovacs, S.; Salyi, G.; Novak Z. *Angew. Chem. Int. Ed.* 2016, 55, 1988–1992; *Angew. Chem.* **2016**, 128, 2028–2032

<sup>2</sup> Tang, Q.; Xia, D.; Jin, X.; Zhang, Q.; Sun, Q. X.; Wang, C. *J. Am. Chem. Soc.*, **2013**, 135, 4628–4631

Methyl benzoyl-*L*-phenylalaninate,<sup>3</sup> methyl benzoyl-*L*-leucinate,<sup>4</sup> and other benzamides were prepared according to the previously reported synthetic methods.

### III. Optimization of reaction conditions

#### III-1. Solvent Effect

A 4 mL screw-cap vial equipped with a stirring bar was charged with *palladium(II) acetate* (0.007 mmol, 10 mol%, 1.6 mg), *N*-methylbenzamide (0.07 mmol, 10.0 mg) and *mesityl*(2,2,2-trifluoroethyl)iodonium trifluoromethanesulfonate (0.08 mmol, 42.4 mg). 0.5 mL solvent was added and the dark brown mixture was stirred at room temperature. *Trifluoroacetic acid* (0.05 mmol, 3.8  $\mu$ l) was added instantly and the vessel was capped for 24 hours. After that reaction conversion was initially checked by TLC. The solvent was then removed under vacuum and the crude was dissolved in CDCl<sub>3</sub> solvent and NMR was run for the sample to calculate the percentage of conversion.

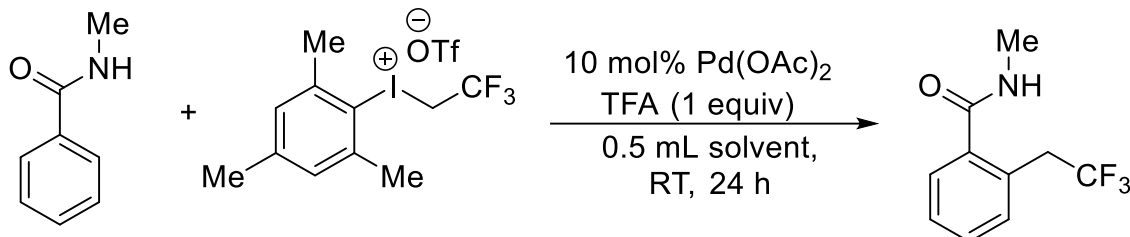

| Entry | Solvent            | Yield |
|-------|--------------------|-------|
| 1     | MeOH               | 0     |
| 2     | CH <sub>3</sub> CN | 0     |
| 3     | Acetone            | 0     |
| 4     | THF                | 20    |
| 5     | DMF                | 0     |
| 6     | DMSO               | 0     |
| 7     | EtOAc              | 50    |
| 8     | Et <sub>2</sub> O  | 90    |
| 9     | Toluene            | 45    |
| 10    | DCM                | 93    |
| 11    | DCE                | 96    |

<sup>3</sup> Thalhammer, A.; Mecinović, J.; Schofield, J. C. *Tetrahedron Lett.* **2009**, *31*, 1045-1047.

<sup>4</sup> Das, S.; Li, Y.; Lu, Q. L.; Junge, K.; Beller, M. *Chem. Eur. J.* **2016**, *22*, 7050-7053.

### III-2. Screening of catalysts

A 4 mL screw-cap vial equipped with a stirring bar was charged with *metal catalyst* (0.007 mmol, 10 mol%), *N-methylbenzamide* (0.07 mmol, 10.0 mg) and *mesityl(2,2,2-trifluoroethyl)iodonium trifluoromethanesulfonate* (0.08 mmol, 42.4 mg). 0.5 mL 1, 2-dichloroethane was added and the dark brown mixture was stirred at room temperature. *Trifluoroacetic acid* (0.05 mmol, 3.8  $\mu$ l) was added instantly and the vessel was capped for 24 hours. After that reaction conversion was initially checked by TLC. Then the solvent was removed under vacuum and the crude was dissolved in  $\text{CDCl}_3$  solvent and NMR was run for the sample to calculate the percentage of conversion.

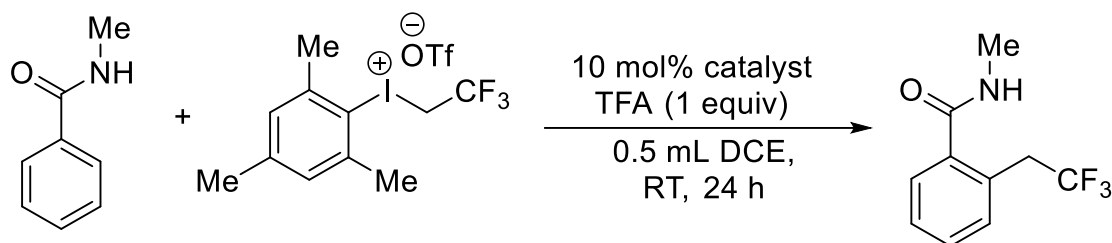

| Entry | Catalyst                  | Yield |
|-------|---------------------------|-------|
| 1     | $\text{Mn}(\text{OAc})_2$ | 0     |
| 2     | $\text{Cu}(\text{OAc})_2$ | 0     |
| 3     | $\text{Zn}(\text{OAc})_2$ | 0     |
| 4     | $\text{Cu}(\text{OTf})_2$ | 0     |
| 5     | $\text{Fe}(\text{OAc})_2$ | 0     |
| 6     | $\text{PdCl}_2$           | 0     |
| 7     | $\text{Pd}(\text{TFA})_2$ | 80    |
| 8     | $\text{Pd}(\text{dba})_3$ | 45    |
| 9     | $\text{Pd}(\text{OAc})_2$ | 96    |

### III-3. Effect of Acid additives

A 4 mL screw-cap vial equipped with a stirring bar was charged with *palladium(II) acetate* (0.007 mmol, 10 mol%, 1.6 mg), *N-methylbenzamide* (0.07 mmol, 10.0 mg) and *mesityl(2,2,2-trifluoroethyl)iodonium trifluoromethanesulfonate* (0.08 mmol, 42.4 mg). 0.5 mL 1, 2-dichloroethane was added and the dark brown mixture was stirred at room temperature. *Acid additive* (0.05 mmol, 3.8  $\mu$ l) was added instantly and the vessel was capped for 24 hours. After

that reaction conversion was initially checked by TLC. Then the solvent was removed under vacuum and the crude was dissolved in  $\text{CDCl}_3$  solvent and NMR was run for the sample to calculate the percentage of conversion.

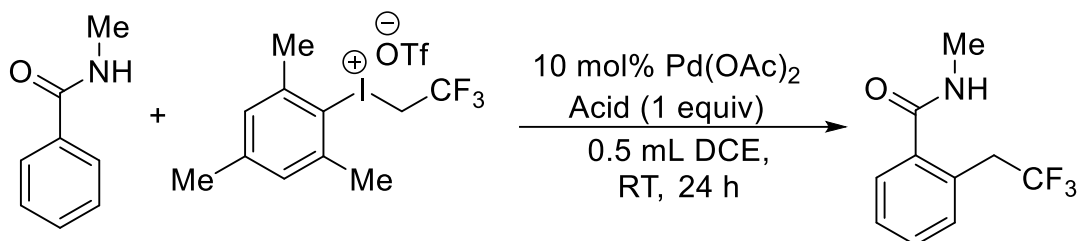

| Entry | Acid                           | Yield |
|-------|--------------------------------|-------|
| 1     | No acid                        | 25    |
| 2     | $\text{H}_2\text{SO}_4$        | 56    |
| 3     | $\text{HBF}_4$                 | 92    |
| 4     | $\text{AcOH}$                  | 15    |
| 5     | TfOH                           | 28    |
| 6     | TsOH. $\text{H}_2\text{O}$     | 88    |
| 7     | $\text{BF}_3 \cdot \text{OEt}$ | 91    |

### III-4. Catalyst Loading

A 4 mL screw-cap vial equipped with a stirring bar was charged with *palladium(II) acetate* (x mol%), *N*-methylbenzamide (0.07 mmol, 10.0 mg) and *mesityl(2,2,2-trifluoroethyl)iodonium trifluoromethanesulfonate* (0.08 mmol, 42.4 mg). 0.5 mL 1, 2-dichloroethane was added and the dark brown mixture was stirred at room temperature. *Trifluoroacetic acid* (0.05 mmol, 3.8  $\mu\text{l}$ ) was added instantly and the vessel was capped for 24 hours. After that reaction conversion was initially checked by TLC. Then the solvent was removed under vacuum and the crude was dissolved in  $\text{CDCl}_3$  solvent and NMR was run for the sample to calculate the percentage of conversion.

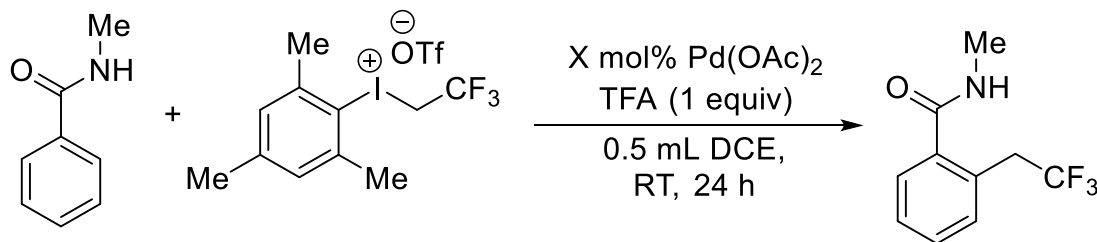

| Entry | X mol% | Yield (%) |
|-------|--------|-----------|
| 1     | 2.5    | 10        |
| 2     | 5.0    | 32        |

|   |      |    |
|---|------|----|
| 3 | 7.5  | 67 |
| 4 | 10.0 | 96 |

## IV Experimental Procedure for Pd-Catalyzed C-H Trifluoroethylation of Arenes and Spectroscopic Data of Compounds Obtained in this Study

### IV-1 Palladium catalyzed direct C-C bond formation of N-methyl aromatic amides with **1** (Table 1)

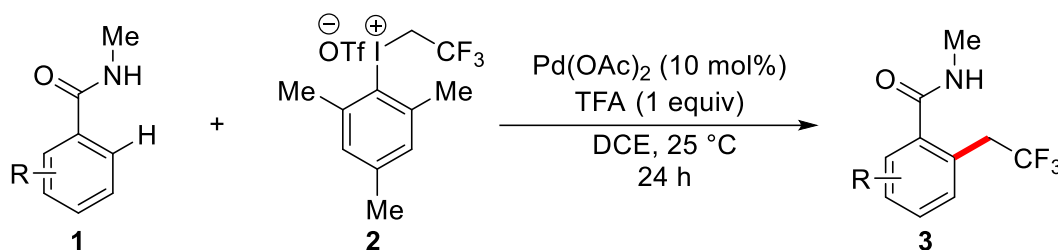

A 4 mL screw-cap vial equipped with a stirring bar was charged with *palladium(II) acetate* (0.1 mmol, 10 mol%), *N*-methylbenzamide (**1**, 1 mmol) and *mesityl(2,2,2-trifluoroethyl)iodonium trifluoromethanesulfonate* (**2**, 1.2 mmol). 0.5 mL *DCE* was added and the dark brown mixture was stirred at room temperature. *Trifluoroacetic acid* (1 mmol) was added instantly and the vessel was capped for 24 hours. After the completion, the reaction mixture was washed with NaHCO<sub>3</sub> solution and extracted with EtOAc (3 x 20mL). The combined organics were dried over MgSO<sub>4</sub>, filtered and dried under vacuum to get the crude product, which was further purified by flash column chromatography using EtOAc and Hexane solvent system to furnish the desired product **3**.

#### *N*-methyl-2-(2,2,2-trifluoroethyl)benzamide (**3a**)

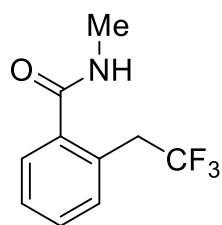

Following the general procedure, **3a** was obtained as a white solid (42 mg, 0.193 mmol, 96%). **MP** = 168-169 °C **<sup>1</sup>H NMR** (400 MHz, CDCl<sub>3</sub>) δ = 7.47 – 7.33 (m, 4H), 6.00 (s, 1H), 3.80 (q, *J*=11.0 Hz, 2H), 2.98 (d, *J*=4.9 Hz, 3H). **<sup>19</sup>F NMR** (376 MHz, CDCl<sub>3</sub>) δ = -65.33. **<sup>13</sup>C NMR** (101 MHz, <sup>19</sup>F coupled, CDCl<sub>3</sub>) δ = 170.16, 137.56, 132.26, 130.16, 128.76, 128.73, 128.20, 127.28, 127.11, 124.53, 36.66, 36.37, 36.07, 35.78, 26.68. **HRMS** (ESI): *m/z* calculated for C<sub>10</sub>H<sub>10</sub>F<sub>3</sub>NO [M+H]<sup>+</sup>: 218.0793, found: 218.0804.

### ***N*,2-dimethyl-6-(2,2,2-trifluoroethyl)benzamide (3b)**

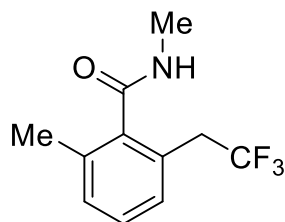

Following the general procedure, **3b** was obtained as a white solid (34 mg, 0.147 mmol, 70%). **MP** =126-127 °C. **<sup>1</sup>H NMR** (400 MHz, CDCl<sub>3</sub>)  $\delta$  = 7.26 (t,  $J$ =7.6 Hz, 1H), 7.18 (t,  $J$ =6.8 Hz, 2H), 5.80 (s, 1H), 3.44 (q,  $J$ =10.9 Hz, 2H), 3.01 (d,  $J$ =4.9 Hz, 3H), 2.34 (s, 3H). **<sup>19</sup>F NMR** (377 MHz, CDCl<sub>3</sub>)  $\delta$  = -64.99. **<sup>13</sup>C NMR** (101 MHz, <sup>19</sup>F coupled, CDCl<sub>3</sub>)  $\delta$  = 169.97, 138.90, 134.93, 130.11, 128.99, 128.42, 127.15, 126.82, 126.79, 126.47, 124.40, 37.51, 37.21, 36.91, 36.62, 26.39, 19.44. **HRMS** (ESI):  $m/z$  calculated for C<sub>11</sub>H<sub>12</sub>F<sub>3</sub>NO [M+H]<sup>+</sup>: 232.0949, found: 232.0960.

### **2-chloro-*N*-methyl-6-(2,2,2-trifluoroethyl)benzamide (3c)**

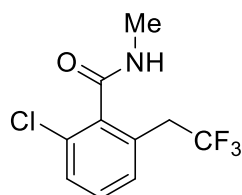

Following the general procedure **3c** was obtained as a white yellow solid (25 mg, 0.099 mmol, 52%). **MP** =108-109 °C. **<sup>1</sup>H NMR** (400 MHz, CDCl<sub>3</sub>)  $\delta$  = 7.41 – 7.24 (m, 3H), 5.85 (s, 1H), 3.51 (q,  $J$ =10.6 Hz, 2H), 3.03 (d,  $J$ =4.9 Hz, 3H). **<sup>19</sup>F NMR** (377 MHz, CDCl<sub>3</sub>)  $\delta$  = -64.99. **<sup>13</sup>C NMR** (101 MHz, <sup>19</sup>F coupled, CDCl<sub>3</sub>)  $\delta$  = 166.91, 137.94, 131.31, 130.17, 129.69, 129.67, 129.62, 129.53, 129.29, 126.81, 124.06, 37.51, 37.21, 36.91, 36.61, 26.57. **HRMS** (ESI):  $m/z$  calculated for C<sub>10</sub>H<sub>9</sub>ClF<sub>3</sub>NO [M+H]<sup>+</sup>: 252.0403, found: 252.0411.

### ***N*,5-dimethyl-2-(2,2,2-trifluoroethyl)benzamide (3d) and *N*,3-dimethyl-2-(2,2,2-trifluoroethyl)benzamide (3d')**

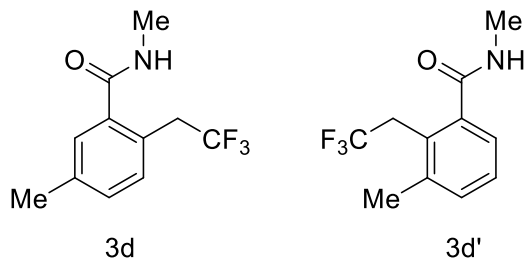

Following the general procedure, **3d** and **3d'** were obtained as inseparable mixture as white solid (40 mg, 0.173 mmol, 82%, **3d**: **3d'** = 5:1). **MP** =196-197 °C. **<sup>1</sup>H NMR** (400 MHz, CDCl<sub>3</sub>)  $\delta$  = 7.30 – 7.18 (m, 4H), 5.87 (s, 1H), 3.73 (q,  $J$ =11.0 Hz, 2H), 2.98 (d,  $J$ =4.9 Hz, 3H), 2.35 (s, 3H). **<sup>19</sup>F NMR** (377 MHz, CDCl<sub>3</sub>)  $\delta$  = -64.37. **<sup>13</sup>C NMR** (101 MHz, <sup>19</sup>F coupled, CDCl<sub>3</sub>)  $\delta$  = 170.29,



138.17, 137.46, 137.43, 132.15, 130.83, 127.79, 120.00, 36.29, 36.01, 35.70, 35.44, 26.69, 20.98. **HRMS** (ESI):  $m/z$  calculated for  $C_{11}H_{12}F_3NO$   $[M+H]^+$ : 232.0949, found: 232.0941.

**5-methoxy-*N*-methyl-2-(2,2,2-trifluoroethyl)benzamide (3e) and 3-methoxy-*N*-methyl-2-(2,2,2-trifluoroethyl)benzamide (3e')**

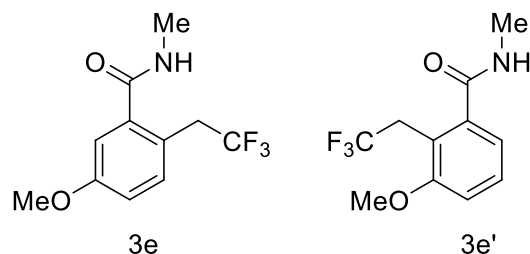

Following the general procedure, **3e** and **3e'** were obtained as inseparable mixture as white solid (34.3 mg, 0.138 mmol, 77%, **3e**: **3e'** = 5:1). **MP** = 165-166 °C. **<sup>1</sup>H NMR** (400 MHz, CDCl<sub>3</sub>)  $\delta$  = 7.27 (dd,  $J$ =7.9, 4.2 Hz, 1H), 6.96 – 6.90 (m, 2H), 5.96 (s, 1H), 3.81 (s, 3H), 3.67 (q,  $J$ =11.0 Hz, 2H), 2.96 (d,  $J$ =4.9 Hz, 3H). **<sup>19</sup>F NMR** (377 MHz, CDCl<sub>3</sub>)  $\delta$  = -64.92. **<sup>13</sup>C NMR** (101 MHz, <sup>19</sup>F coupled, CDCl<sub>3</sub>)  $\delta$  = 169.93, 159.21, 138.67, 133.42, 129.29, 127.38, 124.65, 120.40, 120.37, 119.04, 115.25, 113.09, 112.52, 55.44, 35.97, 35.67, 35.38, 35.08, 26.67. **HRMS** (ESI):  $m/z$  calculated for  $C_{11}H_{12}F_3NO_2$   $[M+H]^+$ : 248.0898, found: 248.0894.

**5-chloro-*N*-methyl-2-(2,2,2-trifluoroethyl)benzamide (3f) and 3-chloro-*N*-methyl-2-(2,2,2-trifluoroethyl)benzamide (3f')**

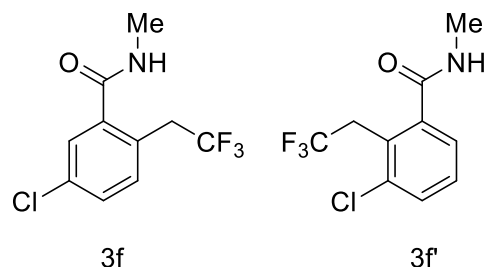

Following the general procedure, **3f** and **3f'** were obtained as white solid (25 mg, 0.099 mmol, 56%). **Major 3f MP** = 175-176 °C. **<sup>1</sup>H NMR** (400 MHz, CDCl<sub>3</sub>)  $\delta$  = 7.54 (dd,  $J$ =6.9, 2.5 Hz, 1H), 7.37 – 7.30 (m, 2H), 5.91 (s, 1H), 4.15 (q,  $J$ =10.7 Hz, 2H), 3.02 (d,  $J$ =4.9 Hz, 3H). **<sup>19</sup>F NMR** (377 MHz, CDCl<sub>3</sub>)  $\delta$  = -64.45. **<sup>13</sup>C NMR** (101 MHz, <sup>19</sup>F coupled, CDCl<sub>3</sub>)  $\delta$  = 169.53, 139.78, 137.42, 131.51, 129.32, 127.22, 127.17, 125.55, 124.41, 33.08, 32.77, 32.47, 32.17, 26.79. **HRMS** (ESI):  $m/z$  calculated for  $C_{10}H_9ClF_3NO$   $[M+H]^+$ : 252.0403, found: 252.0414. **Minor 3f'** (7.4 mg, 0.029 mmol, 16.5% **MP** = 170-171 °C. **<sup>1</sup>H NMR** (400 MHz, CDCl<sub>3</sub>)  $\delta$  = 7.45 – 7.39 (m, 2H), 7.33 (d,  $J$ =8.1 Hz, 1H), 5.94 (s, 1H), 3.77 (q,  $J$ =10.9 Hz, 2H), 3.01 (d,  $J$ =4.9, 3H). **<sup>19</sup>F NMR** (376 MHz, CDCl<sub>3</sub>)  $\delta$  = -65.42. **<sup>13</sup>C NMR** (101 MHz, <sup>19</sup>F coupled, CDCl<sub>3</sub>)  $\delta$  = 168.66, 138.96, 134.30, 133.59, 130.24, 127.34, 127.31, 127.27, 124.24, 36.20, 35.90, 35.61, 35.31, 26.78. **HRMS** (ESI):  $m/z$  calculated for  $C_{10}H_9ClF_3NO$   $[M+H]^+$ : 252.0403, found: 252.0414.

### ***N*-methyl-2-(2,2,2-trifluoroethyl)-5-(trifluoromethyl)benzamide (3g)**

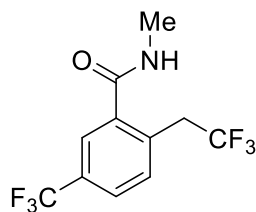

Following the general procedure, **3g** was obtained as a white solid (28.6 mg, 0.100 mmol, 67%). **MP** = 177-178 °C. **<sup>1</sup>H NMR** (400 MHz, CDCl<sub>3</sub>)  $\delta$  = 7.69 (d,  $J$ =5.9 Hz, 2H), 7.52 (d,  $J$ =8.4 Hz, 1H), 5.99 (s, 1H), 3.85 (q,  $J$ =10.8 Hz, 2H), 3.01 (d,  $J$ =4.9 Hz, 3H). **<sup>19</sup>F NMR** (377 MHz, CDCl<sub>3</sub>)  $\delta$  = -62.89, -65.08. **<sup>13</sup>C NMR** (101 MHz, <sup>19</sup>F coupled, CDCl<sub>3</sub>)  $\delta$  = 168.62, 138.24, 132.84, 130.87, 130.54, 126.86, 126.83, 124.77, 124.11, 124.07, 122.06, 36.66, 36.36, 36.06, 35.76, 26.82. **HRMS** (ESI):  $m/z$  calculated for C<sub>11</sub>H<sub>9</sub>F<sub>6</sub>NO [M+H]<sup>+</sup>: 286.0667, found: 285.0667.

### ***N*,4-dimethyl-2-(2,2,2-trifluoroethyl)benzamide (3h)**

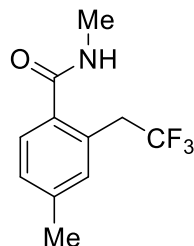

Following the general procedure, **3h** was obtained as a white solid (51.7 mg, 0.223 mmol, 78%). **MP** = 199-200 °C. **<sup>1</sup>H NMR** (400 MHz, CDCl<sub>3</sub>)  $\delta$  = 7.31 (d,  $J$ =7.7 Hz, 1H), 7.15 (d,  $J$ =10.6 Hz, 2H), 5.86 (s, 1H), 3.78 (q,  $J$ =11.0 Hz, 2H), 2.97 (d,  $J$ =4.9 Hz, 3H), 2.37 (s, 3H). **<sup>19</sup>F NMR** (377 MHz, CDCl<sub>3</sub>)  $\delta$  = -65.28. **<sup>13</sup>C NMR** (101 MHz, <sup>19</sup>F coupled, CDCl<sub>3</sub>)  $\delta$  = 170.24, 140.40, 134.65, 133.02, 128.81, 127.36, 127.11, 124.60, 36.59, 36.30, 36.01, 35.71, 26.70, 21.21. **HRMS** (ESI):  $m/z$  calculated for C<sub>11</sub>H<sub>12</sub>F<sub>3</sub>NO [M+H]<sup>+</sup>: 232.0949, found: 232.0955.

### **4-fluoro-*N*-methyl-2-(2,2,2-trifluoroethyl)benzamide (3i)**

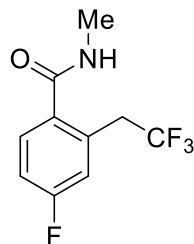

Following the general procedure, **3i** was obtained as a white solid (55 mg, 0.0234 mmol, 68%). **MP** = 160-161 °C. **<sup>1</sup>H NMR** (400 MHz, CDCl<sub>3</sub>)  $\delta$  = 7.42 (dd,  $J$ =8.5, 5.7 Hz, 1H), 7.12 – 7.00 (m, 2H), 5.94 (s, 1H), 3.80 (q,  $J$ =10.8 Hz, 2H), 2.97 (d,  $J$ =4.9 Hz, 3H). **<sup>19</sup>F NMR** (377 MHz, CDCl<sub>3</sub>)  $\delta$  = -65.22, -109.54 - -109.60. **<sup>13</sup>C NMR** (101 MHz, <sup>19</sup>F coupled, CDCl<sub>3</sub>)  $\delta$  = 169.23, 164.34, 161.85, 133.73, 133.70, 131.76, 131.68, 129.19, 129.10, 126.97, 124.21, 119.40, 119.18, 115.24,

115.03, 36.62, 36.33, 36.03, 35.73, 26.77. **HRMS** (ESI):  $m/z$  calculated for  $C_{10}H_9F_4NO$   $[M+H]^+$ : 236.0699, found: 236.0706.

#### 4-chloro-*N*-methyl-2-(2,2,2-trifluoroethyl)benzamide (3j)

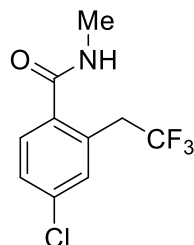

Following the general procedure, **3j** was obtained as a white solid (55 mg, 0.219 mmol, 75%). **MP** = 168–169 °C.  **$^1H$  NMR** (400 MHz,  $CDCl_3$ )  $\delta$  = 7.40 – 7.30 (m, 4H), 5.93 (s, 1H), 3.77 (q,  $J$ =10.8 Hz, 2H), 2.97 (d,  $J$ =4.9 Hz, 3H).  **$^{19}F$  NMR** (377 MHz,  $CDCl_3$ )  $\delta$  = -65.20.  **$^{13}C$  NMR** (101 MHz,  $^{19}F$  coupled,  $CDCl_3$ )  $\delta$  = 169.13, 136.14, 135.86, 132.28, 130.87, 130.82, 128.43, 128.40, 126.95, 124.19, 36.48, 36.18, 35.88, 35.58, 26.77. **HRMS** (ESI):  $m/z$  calculated for  $C_{10}H_9ClF_3NO$   $[M+H]^+$ : 252.0403, found: 252.0403.

#### 4-methoxy-*N*-methyl-2-(2,2,2-trifluoroethyl)benzamide (3k)

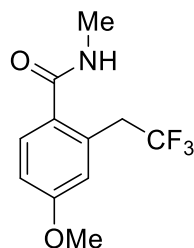

Following the general procedure, **3k** was obtained as a white solid (37.3 mg, 0.151 mmol, 84%). **MP**. = 196–197 °C  **$^1H$  NMR** (400 MHz,  $CDCl_3$ )  $\delta$  = 7.40 (d,  $J$ =8.4 Hz, 1H), 6.94 – 6.84 (m, 2H), 5.88 (s, 1H), 3.90 – 3.80 (m, 5H), 2.99 (d,  $J$ =4.9 Hz, 3H).  **$^{19}F$  NMR** (377 MHz,  $CDCl_3$ )  $\delta$  = -65.17.  **$^{13}C$  NMR** (101 MHz,  $^{19}F$  coupled,  $CDCl_3$ )  $\delta$  = 169.95, 160.65, 130.98, 130.95, 129.81, 128.73, 118.06, 113.00, 55.40, 36.75, 36.45, 36.16, 35.86, 26.74. **HRMS** (ESI):  $m/z$  calculated for  $C_{11}H_{12}F_3NO_2$   $[M+H]^+$ : 248.0898, found: 248.0892.

#### *N*-methyl-2-(2,2,2-trifluoroethyl)-4-(trifluoromethyl)benzamide (3l)

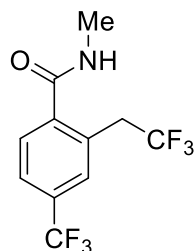

Following the general procedure, **3l** was obtained as a white solid (37.6 mg, 0.131 mmol, 74%). **MP** = 171-172 °C. **<sup>1</sup>H NMR** (400 MHz, CDCl<sub>3</sub>)  $\delta$  = 7.64 (d,  $J$ =6.3 Hz, 2H), 7.55 (d,  $J$ =8.4 Hz, 1H), 5.95 (s, 1H), 3.83 (q,  $J$ =10.8 Hz, 2H), 3.01 (d,  $J$ =4.9 Hz, 3H). **<sup>19</sup>F NMR** (377 MHz, CDCl<sub>3</sub>)  $\delta$  = -63.06, -65.28. **<sup>13</sup>C NMR** (101 MHz, <sup>19</sup>F coupled, CDCl<sub>3</sub>)  $\delta$  = 168.76, 140.83, 132.80, 132.48, 132.15, 131.82, 129.91, 129.88, 129.58, 129.05, 129.01, 127.62, 126.83, 125.34, 125.31, 125.27, 125.23, 124.66, 124.07, 121.95, 36.68, 36.38, 36.08, 35.78, 26.81. **HRMS** (ESI):  $m/z$  calculated for C<sub>11</sub>H<sub>9</sub>F<sub>6</sub>NO [M+H]<sup>+</sup>: 286.0667, found: 286.0667.

### ***N*-methyl-4-nitro-2-(2,2,2-trifluoroethyl)benzamide (3m)**

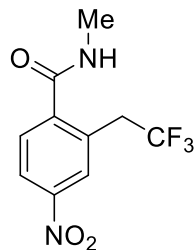

Following the general procedure, **3m** was obtained as a white solid (28.0 mg, 0.106 mmol, 65%). **MP** = 225-226 °C. **<sup>1</sup>H NMR** (400 MHz, DMSO)  $\delta$  = 8.70 (d,  $J$ =4.2 Hz, 1H), 8.37 (d,  $J$ =1.9 Hz, 1H), 8.30 (dd,  $J$ =8.4 Hz, 2.4, 1H), 7.74 (d,  $J$ =8.4 Hz, 1H), 4.12 (q,  $J$ =11.4 Hz, 2H), 2.79 (d,  $J$ =4.5 Hz, 3H). **<sup>19</sup>F NMR** (376 MHz, DMSO)  $\delta$  = -63.84. **<sup>13</sup>C NMR** (101 MHz, <sup>19</sup>F coupled, DMSO)  $\delta$  = 167.71, 148.18, 143.86, 143.80, 130.91, 130.88, 129.97, 127.72, 127.13, 124.96, 123.73, 35.52, 35.23, 34.94, 34.65, 26.54. **HRMS** (ESI):  $m/z$  calculated for C<sub>10</sub>H<sub>9</sub>F<sub>3</sub>N<sub>2</sub>O<sub>3</sub> [M+H]<sup>+</sup>: 263.0644, found: 263.0641.

### ***N*-methyl-3-(2,2,2-trifluoroethyl)-[1, 1'-biphenyl]-4-carboxamide (3n)**

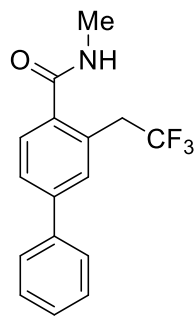

Following the general procedure, **3n** was obtained as a white solid (48 mg, 0.163 mmol, 82%). **MP** = 230-231 °C. **<sup>1</sup>H NMR** (400 MHz, CDCl<sub>3</sub>)  $\delta$  = 7.57 (dt,  $J$ =4.8, 1.6 Hz, 4H), 7.47 (t,  $J$ =11.5 Hz, 3H), 7.42 – 7.36 (m, 1H), 5.95 (s, 1H), 3.88 (q,  $J$ =11.0 Hz, 2H), 3.01 (d,  $J$ =4.9 Hz, 3H). **<sup>19</sup>F NMR** (377 MHz, CDCl<sub>3</sub>)  $\delta$  = -65.19. **<sup>13</sup>C NMR** (101 MHz, <sup>19</sup>F coupled, CDCl<sub>3</sub>)  $\delta$  = 169.95, 143.21, 139.60, 136.14, 131.09, 129.47, 129.43, 129.42, 129.37, 128.97, 128.11, 127.64, 127.32, 127.19, 126.83, 124.57, 53.41, 36.83, 36.53, 36.24, 35.94, 26.77. **HRMS** (ESI):  $m/z$  calculated for C<sub>16</sub>H<sub>14</sub>F<sub>3</sub>NO [M+H]<sup>+</sup>: 294.1106, found: 294.1115.

### 3, 5-difluoro-*N*-methyl-2-(2,2,2-trifluoroethyl)benzamide (3o)

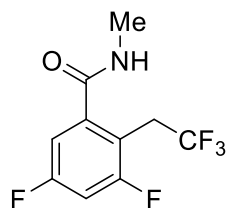

Following the general procedure, **3o** was obtained as a white solid (46.3 mg, 0.183 mmol, 65%). **MP** =159-160 °C. **<sup>1</sup>H NMR** (400 MHz, CDCl<sub>3</sub>)  $\delta$  = 7.01 – 6.90 (m, 2H), 6.17 (s, 1H), 3.84 (q,  $J$ =10.6 Hz, 2H), 2.97 (d,  $J$ =4.8 Hz, 3H). **<sup>19</sup>F NMR** (377 MHz, CDCl<sub>3</sub>)  $\delta$  = -65.70, -65.73, -65.75, -65.78, -108.09 - -108.65. **<sup>13</sup>C NMR** (101 MHz, <sup>19</sup>F coupled, CDCl<sub>3</sub>)  $\delta$  = 167.77, 163.56, 163.44, 161.06, 160.94, 140.43, 140.35, 126.79, 124.04, 112.93, 112.76, 110.71, 110.67, 110.48, 110.45, 105.89, 105.64, 105.62, 105.37, 29.11, 29.08, 28.80, 28.76, 28.48, 28.45, 28.17, 28.14, 26.74. **HRMS** (ESI):  $m/z$  calculated for C<sub>10</sub>H<sub>8</sub>F<sub>5</sub>NO [M+H]<sup>+</sup>: 254.0604, found: 254.0608.

### 4, 5-dichloro-*N*-methyl-2-(2,2,2-trifluoroethyl)benzamide (3p)

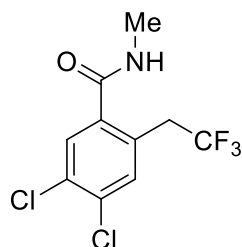

Following the general procedure, **3p** was obtained as a white solid (31 mg, 0.108 mmol, 67%). **MP** =216-217 °C. **<sup>1</sup>H NMR** (400 MHz, CDCl<sub>3</sub>)  $\delta$  = 7.53 (s, 1H), 7.47 (s, 1H), 5.89 (s, 1H), 3.75 (q,  $J$ =10.7 Hz, 2H), 2.99 (d,  $J$ =4.9 Hz, 3H). **<sup>19</sup>F NMR** (377 MHz, CDCl<sub>3</sub>)  $\delta$  = -65.28. **<sup>13</sup>C NMR** (101 MHz, <sup>19</sup>F coupled, CDCl<sub>3</sub>)  $\delta$  = 167.79, 136.98, 134.49, 134.03, 132.68, 129.07, 128.98, 128.88, 36.05, 35.75, 35.45, 35.15, 26.84. **HRMS** (ESI):  $m/z$  calculated for C<sub>10</sub>H<sub>8</sub>Cl<sub>2</sub>F<sub>3</sub>NO [M+H]<sup>+</sup>: 286.0013, found: 286.0011.

### 4, 5-dimethoxy-*N*-methyl-2-(2,2,2-trifluoroethyl)benzamide (3q)

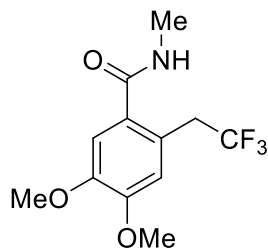

Following the general procedure, **3q** was obtained as a white solid (38.1 mg, 0.137 mmol, 79%). **MP** =208-209 °C. **<sup>1</sup>H NMR** (400 MHz, CDCl<sub>3</sub>)  $\delta$  = 6.91 (s, 1H), 6.81 (s, 1H), 5.92 (s, 1H), 3.89 (d,  $J$ =10.0 Hz, 6H), 3.72 (q,  $J$ =10.9 Hz, 2H), 2.97 (d,  $J$ =4.7 Hz, 3H). **<sup>19</sup>F NMR** (377 MHz, CDCl<sub>3</sub>)  $\delta$  = -65.40. **<sup>13</sup>C NMR** (101 MHz, <sup>19</sup>F coupled, CDCl<sub>3</sub>)  $\delta$  = 169.89, 150.08, 148.47, 130.03, 127.38,

124.58, 121.54, 114.65, 110.47, 56.09, 56.05, 36.35, 36.06, 35.76, 35.47, 26.74. **HRMS** (ESI):  $m/z$  calculated for  $C_{12}H_{14}F_3NO_3$   $[M+H]^+$ : 278.1004, found: 278.1003.

### ***N*-methyl-2-(2,2,2-trifluoroethyl)-1-naphthamide (3r)**

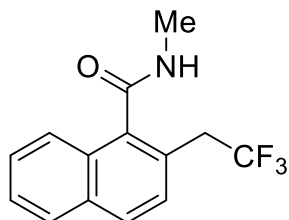

Following the general procedure, **3r** was obtained as a white solid (31.8 mg, 0.119 mmol, 67%). **MP** =160-161 °C. **<sup>1</sup>H NMR** (400 MHz,  $CDCl_3$ )  $\delta$  = 7.89 (ddd,  $J$ =15.8, 7.9, 1.5 Hz, 2H), 7.54 – 7.45 (m, 3H), 7.42 (d,  $J$ =8.0 Hz, 1H), 6.21 (s, 1H), 4.01 (dd,  $J$ =21.2, 10.5 Hz, 2H), 3.05 (d,  $J$ =4.9 Hz, 3H). **<sup>19</sup>F NMR** (377 MHz,  $CDCl_3$ )  $\delta$  = -64.58. **<sup>13</sup>C NMR** (101 MHz,  $^{19}F$  coupled,  $CDCl_3$ )  $\delta$  = 173.11, 135.12, 134.31, 132.16, 131.54, 130.01, 128.75, 127.65, 127.32, 126.24, 126.21, 125.81, 124.89, 124.49, 38.35, 38.06, 37.77, 37.48, 27.00. **HRMS** (ESI):  $m/z$  calculated for  $C_{14}H_{12}F_3NO$   $[M+H]^+$ : 268.0949, found: 268.0949

### ***N*-methyl-3-(2,2,2-trifluoroethyl)-2-naphthamide (3s)**

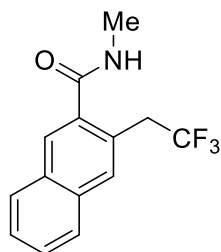

Following the general procedure, **3s** was obtained as a white solid (34.8 mg, 0.130 mmol, 75%). **MP** =217-218 °C. **<sup>1</sup>H NMR** (400 MHz,  $CDCl_3$ )  $\delta$  = 7.96 (s, 1H), 7.87 (d,  $J$ =7.6 Hz, 3H), 7.63 – 7.54 (m, 2H), 6.08 (s, 1H), 4.00 (q,  $J$ =11.0 Hz, 2H), 3.08 (d,  $J$ =4.9 Hz, 3H). **<sup>19</sup>F NMR** (377 MHz,  $CDCl_3$ )  $\delta$  = -65.36. **<sup>13</sup>C NMR** (101 MHz,  $^{19}F$  coupled,  $CDCl_3$ )  $\delta$  = 170.26, 134.96, 133.57, 132.06, 132.01, 127.89, 127.74, 127.71, 127.26, 127.12, 125.81, 125.77, 125.71, 125.68, 36.86, 36.57, 36.27, 35.95, 26.84. **HRMS** (ESI):  $m/z$  calculated for  $C_{14}H_{12}F_3NO$   $[M+H]^+$ : 268.0949, found: 268.0952

### ***N*-methyl-3-(2,2,2-trifluoroethyl)thiophene-2-carboxamide (3t)**

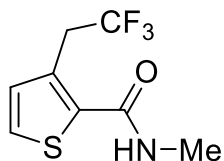

Following the general procedure, **3t** was obtained as a white solid (18 mg, 0.080 mmol, 20%). **MP** =147-148 °C. **<sup>1</sup>H NMR** (400 MHz,  $CDCl_3$ )  $\delta$  = 7.32 (d,  $J$ =5.1 Hz, 1H), 7.09 (d,  $J$ =5.0 Hz, 1H),

5.91 (s, 1H), 3.97 (q,  $J=10.9$  Hz, 2H), 2.97 (d,  $J=4.9$  Hz, 3H).  **$^{19}\text{F}$  NMR** (377 MHz,  $\text{CDCl}_3$ )  $\delta = -65.00$ .  **$^{13}\text{C}$  NMR** (101 MHz,  $^{19}\text{F}$  coupled,  $\text{CDCl}_3$ )  $\delta = 162.95, 134.00, 133.96, 133.59, 130.98, 126.96, 126.08, 124.21, 33.35, 33.05, 32.74, 32.44, 26.75$ . **HRMS** (ESI):  $m/z$  calculated for  $\text{C}_8\text{H}_8\text{F}_3\text{NOS}$   $[\text{M}+\text{H}]^+$ : 224.0357, found: 224.0366.

## IV-2 Palladium catalyzed direct C-C bond formation of aromatic amides with 1 (Table 2)

### *N*-ethyl-2-(2,2,2-trifluoroethyl)benzamide (5a)

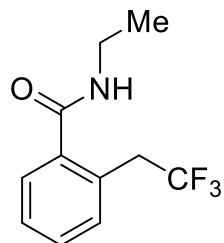

Following the general procedure, **5a** was obtained as a white solid (42.8 mg, 0.185 mmol, 76%). **MP** = 142–143 °C.  **$^1\text{H}$  NMR** (400 MHz,  $\text{CDCl}_3$ )  $\delta = 7.45 - 7.30$  (m, 4H), 5.98 (s, 1H), 3.78 (q,  $J=11.0$  Hz, 2H), 3.44 (qd,  $J=7.3, 5.9$  Hz, 2H), 1.21 (t,  $J=7.3$  Hz, 3H).  **$^{19}\text{F}$  NMR** (377 MHz,  $\text{CDCl}_3$ )  $\delta = -65.25$ .  **$^{13}\text{C}$  NMR** (101 MHz,  $^{19}\text{F}$  coupled,  $\text{CDCl}_3$ )  $\delta = 169.40, 137.79, 132.24, 130.07, 128.66, 128.63, 128.19, 127.32, 127.09, 124.57, 36.64, 36.34, 36.04, 35.75, 34.82, 14.67$ . **HRMS** (ESI):  $m/z$  calculated for  $\text{C}_{11}\text{H}_{12}\text{F}_3\text{NO}$   $[\text{M}+\text{H}]^+$ : 232.0949, found: 232.0952.

### *N*-benzyl-2-(2,2,2-trifluoroethyl)benzamide (5b)

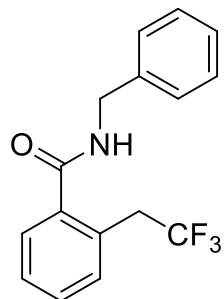

Following the general procedure, **5b** was obtained as a white solid (21.5 mg, 0.073 mmol, 52%). **MP** = 146–147 °C.  **$^1\text{H}$  NMR** (400 MHz,  $\text{CDCl}_3$ )  $\delta = 7.47 - 7.27$  (m, 9H), 6.20 (s, 1H), 4.60 (d,  $J=5.7$  Hz, 2H), 3.82 (q,  $J=11.0$  Hz, 2H).  **$^{19}\text{F}$  NMR** (377 MHz,  $\text{CDCl}_3$ )  $\delta = -65.17$ .  **$^{13}\text{C}$  NMR** (101 MHz,  $^{19}\text{F}$  coupled,  $\text{CDCl}_3$ )  $\delta = 169.21, 137.79, 137.28, 132.38, 130.33, 128.97, 128.94, 128.84, 128.25, 127.91, 127.74, 127.29, 127.15, 44.12, 36.64, 36.34, 36.05, 35.75$ . **HRMS** (ESI):  $m/z$  calculated for  $\text{C}_{16}\text{H}_{14}\text{F}_3\text{NO}$   $[\text{M}+\text{H}]^+$ : 294.1106, found: 294.1112

### ***N*-propyl-2-(2,2,2-trifluoroethyl)benzamide (5c)**

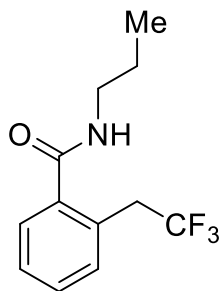

Following the general procedure, **5c** was obtained as a white solid (41.5 mg, 0.169 mmol, 80%). **MP** =130-131 °C. **<sup>1</sup>H NMR** (400 MHz, CDCl<sub>3</sub>)  $\delta$  = 7.45 – 7.30 (m, 4H), 5.99 (s, 1H), 3.78 (q,  $J$ =11.0 Hz, 2H), 3.41 – 3.34 (m, 2H), 1.68 – 1.55 (m, 2H), 0.97 (t,  $J$ =7.4 Hz, 3H). **<sup>19</sup>F NMR** (377 MHz, CDCl<sub>3</sub>)  $\delta$  = -65.24. **<sup>13</sup>C NMR** (101 MHz, <sup>19</sup>F coupled, CDCl<sub>3</sub>)  $\delta$  = 169.49, 137.87, 132.24, 130.08, 128.69, 128.66, 128.19, 127.31, 127.09, 124.55, 41.69, 36.64, 36.34, 36.05, 35.75, 22.75, 11.31. **HRMS** (ESI):  $m/z$  calculated for C<sub>12</sub>H<sub>14</sub>F<sub>3</sub>NO [M+H]<sup>+</sup>: 246.1106, found: 246.1112

### ***N*-butyl-2-(2,2,2-trifluoroethyl)benzamide (5d)**

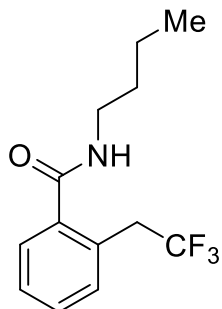

Following the general procedure, **5d** was obtained as a white solid (32.6 mg, 0.125 mmol, 72%). **MP** =127-129 °C. **<sup>1</sup>H NMR** (400 MHz, CDCl<sub>3</sub>)  $\delta$  = 7.45 – 7.31 (m, 4H), 5.95 (s, 1H), 3.78 (q,  $J$ =11.0 Hz, 2H), 3.41 (dd,  $J$ =13.1, 7.0 Hz, 2H), 1.62 – 1.53 (m, 2H), 1.40 (dq,  $J$ =14.4, 7.3 Hz, 2H), 0.95 (t,  $J$ =7.3 Hz, 3H). **<sup>19</sup>F NMR** (377 MHz, CDCl<sub>3</sub>)  $\delta$  = -65.24. **<sup>13</sup>C NMR** (101 MHz, <sup>19</sup>F coupled, CDCl<sub>3</sub>)  $\delta$  = 169.44, 137.87, 132.23, 130.07, 128.69, 128.66, 128.19, 127.31, 127.09, 124.55, 39.70, 36.64, 36.35, 36.05, 35.76, 31.53, 20.05, 13.69. **HRMS** (ESI):  $m/z$  calculated for C<sub>13</sub>H<sub>16</sub>F<sub>3</sub>NO [M+H]<sup>+</sup>: 260.1262, found: 260.1273

### ***N*-(tert-butyl)-2-(2,2,2-trifluoroethyl)benzamide (5f)**



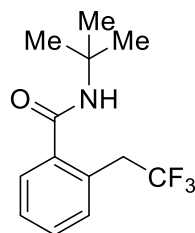

Following the general procedure, **5f** was obtained as a white solid (41.5 mg, 0.160 mmol, 85%). **MP** = 117–118 °C. **<sup>1</sup>H NMR** (400 MHz, CDCl<sub>3</sub>)  $\delta$  = 7.43 – 7.29 (m, 4H), 5.71 (s, 1H), 3.76 (q,  $J$ =11.0 Hz, 2H), 1.45 (s, 9H). **<sup>19</sup>F NMR** (377 MHz, CDCl<sub>3</sub>)  $\delta$  = -65.12. **<sup>13</sup>C NMR** (101 MHz, <sup>19</sup>F coupled, CDCl<sub>3</sub>)  $\delta$  = 169.02, 138.89, 132.19, 129.78, 128.28, 128.25, 128.15, 127.36, 127.03, 124.61, 52.00, 36.57, 36.27, 35.97, 35.68, 28.65. **HRMS** (ESI):  $m/z$  calculated for C<sub>13</sub>H<sub>16</sub>F<sub>3</sub>NO [M+H]<sup>+</sup>: 260.1262, found: 260.1253

### *N*-cyclopentyl-2-(2,2,2-trifluoroethyl)benzamide (**5g**)

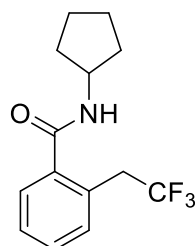

Following the general procedure, **5g** was obtained as a white solid (33.1 mg, 0.122 mmol, 73%). **MP** = 154–155 °C. **<sup>1</sup>H NMR** (400 MHz, CDCl<sub>3</sub>)  $\delta$  = 7.44 – 7.32 (m, 4H), 5.86 (s, 1H), 4.44 – 4.30 (m, 1H), 3.77 (q,  $J$ =11.0 Hz, 2H), 2.12 – 2.01 (m, 2H), 1.75 – 1.60 (m, 4H), 1.48 (tt,  $J$ =13.1, 4.0 Hz, 2H). **<sup>19</sup>F NMR** (377 MHz, CDCl<sub>3</sub>)  $\delta$  = -65.20. **<sup>13</sup>C NMR** (101 MHz, <sup>19</sup>F coupled, CDCl<sub>3</sub>)  $\delta$  = 169.10, 137.97, 132.24, 130.02, 128.57, 128.54, 127.33, 127.10, 124.58, 51.67, 36.66, 36.36, 36.07, 35.77, 33.03, 23.70. **HRMS** (ESI):  $m/z$  calculated for C<sub>14</sub>H<sub>16</sub>F<sub>3</sub>NO [M+H]<sup>+</sup>: 272.1262, found: 272.1275

### *N*-cyclohexyl-2-(2,2,2-trifluoroethyl)benzamide (**5h**)

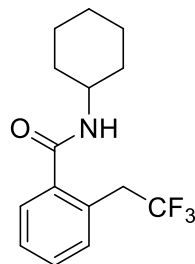

Following the general procedure, **5h** was obtained as a white solid (35.4 mg, 0.124 mmol, 78%). **MP** = 189–190 °C. **<sup>1</sup>H NMR** (400 MHz, CDCl<sub>3</sub>)  $\delta$  = 7.47 – 7.34 (m, 4H), 5.79 (d,  $J$ =6.6 Hz, 1H), 4.03 – 3.92 (m, 1H), 3.80 (q,  $J$ =11.0 Hz, 2H), 2.10 – 2.00 (m, 2H), 1.82 – 1.73 (m, 2H), 1.66 (dd,  $J$ =9.2, 5.3 Hz, 1H), 1.53 – 1.39 (m, 2H), 1.23 (tdd,  $J$ =16.8, 7.6, 4.1 Hz, 3H). **<sup>19</sup>F NMR** (377 MHz, CDCl<sub>3</sub>)  $\delta$  = -65.14. **<sup>13</sup>C NMR** (101 MHz, <sup>19</sup>F coupled, CDCl<sub>3</sub>)  $\delta$  = 168.62, 138.09, 132.24, 130.00,

128.55, 128.52, 128.21, 127.33, 127.08, 126.81, 124.58, 48.68, 36.67, 36.38, 36.08, 35.79, 32.99, 25.51, 24.83. **HRMS** (ESI):  $m/z$  calculated for  $C_{15}H_{18}F_3NO$   $[M+H]^+$ : 286.1419, found: 286.1416.

***N*-(4-methoxybenzyl)-2-(2,2,2-trifluoroethyl)benzamide (5i)**

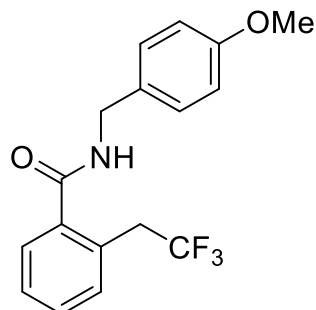

Following the general procedure, **5i** was obtained as a white solid (33.0 mg, 0.102 mmol, 64%). **MP** =141-142 °C. **<sup>1</sup>H NMR** (400 MHz,  $CDCl_3$ )  $\delta$  = 7.44 – 7.31 (m, 4H), 7.29 – 7.24 (m, 2H), 6.88 (d,  $J$ =8.6 Hz, 2H), 6.13 (s, 1H), 4.54 (d,  $J$ =5.6 Hz, 2H), 3.90 – 3.72 (m, 5H). **<sup>19</sup>F NMR** (377 MHz,  $CDCl_3$ )  $\delta$  = -65.17. **<sup>13</sup>C NMR** (101 MHz,  $^{19}F$  coupled,  $CDCl_3$ )  $\delta$  = 169.12, 159.22, 137.37, 132.35, 130.27, 129.86, 129.28, 128.92, 128.89, 128.23, 127.30, 127.14, 124.57, 114.22, 55.32, 43.60, 36.64, 36.35, 36.05, 35.76. **HRMS** (ESI):  $m/z$  calculated for  $C_{17}H_{16}F_3NO$   $[M+H]^+$ : 324.1211, found: 324.1213

***N*-((3s, 5s, 7s)-adamantan-1-yl)-2-(2,2,2-trifluoroethyl)benzamide (5j)**

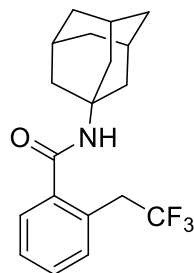

Following the general procedure, **5j** was obtained as a white solid (36.0 mg, 0.106mmol, 88%). **MP** =184-185 °C. **<sup>1</sup>H NMR** (400 MHz,  $CDCl_3$ )  $\delta$  = 7.42 – 7.31 (m, 4H), 6.89 – 6.85 (m, 1H), 5.54 (s, 1H), 3.76 (q,  $J$ =11.0 Hz, 2H), 2.43 (s, 2H), 2.12 (d,  $J$ =7.5 Hz, 9H), 1.72 (s, 6H). **<sup>19</sup>F NMR** (377 MHz,  $CDCl_3$ )  $\delta$  = -64.96. **<sup>13</sup>C NMR** (101 MHz,  $^{19}F$  coupled,  $CDCl_3$ )  $\delta$  = 168.76, 141.75, 138.99, 137.32, 132.16, 129.74, 129.21, 128.30, 128.27, 128.24, 128.14, 127.94, 127.40, 127.03, 124.64, 52.76, 41.51, 36.60, 36.35, 36.30, 35.97, 35.71, 29.48. **HRMS** (ESI):  $m/z$  calculated for  $C_{19}H_{22}F_3NO$   $[M+H]^+$ : 338.1732, found: 338.1716.

**(S)-N-(phenylethyl)-2-(2,2,2-trifluoroethyl)benzamide (5k)**

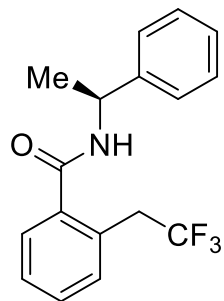

Following the general procedure, **5k** was obtained as a white solid (26.0 mg, 0.084 mmol, 46%). **MP** = 160–161 °C. **<sup>1</sup>H NMR** (400 MHz, CDCl<sub>3</sub>)  $\delta$  = 7.45 – 7.26 (m, 9H), 6.14 (d,  $J$ =6.9 Hz, 1H), 5.35 – 5.24 (m, 1H), 3.87 (dq,  $J$ =14.8, 11.0 Hz, 1H), 3.67 (dq,  $J$ =14.8, 11.0 Hz, 1H), 1.58 (d,  $J$ =6.9 Hz, 3H). **<sup>19</sup>F NMR** (377 MHz, CDCl<sub>3</sub>)  $\delta$  = -65.13. **<sup>13</sup>C NMR** (101 MHz, <sup>19</sup>F coupled, CDCl<sub>3</sub>)  $\delta$  = 168.48, 142.73, 137.56, 132.32, 130.22, 128.79, 128.23, 127.57, 127.30, 127.14, 126.22, 124.55, 49.28, 36.60, 36.31, 36.01, 35.71, 21.46. **HRMS** (ESI):  $m/z$  calculated for C<sub>17</sub>H<sub>16</sub>F<sub>3</sub>NO [M+H]<sup>+</sup>: 308.1262, found: 308.1273. ee = 96%. HPLC with an AS-H column at 254 nm (2-propanol: hexane = 10:90), 1.0 mL/min; major enantiomer  $t_{\text{major}}$  = 11.49 min, minoe enantiomer  $t_{\text{minor}}$  = 14.38 min.

**Methyl (2-(2,2,2-trifluoroethyl)benzoyl)-D-leucinate (5l)**

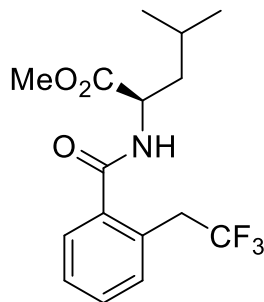

Following the general procedure, **5l** was obtained as a white solid (36.0 mg, 0.108 mmol, 74%). **MP** = 125–126 °C. **<sup>1</sup>H NMR** (400 MHz, CDCl<sub>3</sub>)  $\delta$  = 7.44 (ddd,  $J$ =18.0, 14.4, 4.8 Hz, 4H), 6.26 (d,  $J$ =7.7 Hz, 1H), 4.81 (dd,  $J$ =10.2, 7.2 Hz, 1H), 3.96 – 3.65 (m, 5H), 1.81 – 1.57 (m, 3H), 0.98 (dd,  $J$ =8.9, 5.6 Hz, 6H). **<sup>19</sup>F NMR** (377 MHz, CDCl<sub>3</sub>)  $\delta$  = -65.19. **<sup>13</sup>C NMR** (101 MHz, <sup>19</sup>F coupled, CDCl<sub>3</sub>)  $\delta$  = 173.23, 169.00, 136.93, 132.27, 130.48, 128.92, 128.90, 128.87, 128.29, 127.41, 127.25, 124.49, 52.37, 51.09, 41.48, 36.55, 36.26, 35.96, 35.67, 24.93, 22.80, 21.83. **HRMS** (ESI):  $m/z$  calculated for C<sub>17</sub>H<sub>16</sub>F<sub>3</sub>NO [M+H]<sup>+</sup>: 332.1474, found: 332.1466. ee = 95%. HPLC with an AS-H column at 254 nm (2-propanol: hexane = 10:90), 1.0 mL/min; major enantiomer  $t_{\text{major}}$  = 6.32 min, minoe enantiomer  $t_{\text{minor}}$  = 9.18 min.

## Methyl (2-(2,2,2-trifluoroethyl)benzoyl)-*D*-phenylalaninate (**5m**)

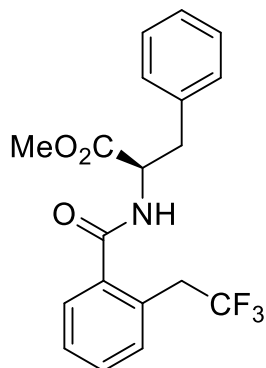

Following the general procedure, **5m** was obtained as a white solid (28.4 mg, 0.077 mmol, 65%). **MP** = 155–156 °C. **<sup>1</sup>H NMR** (400 MHz, CDCl<sub>3</sub>)  $\delta$  = 7.49 – 7.25 (m, 7H), 7.19 (d,  $J$ =5.2 Hz, 2H), 6.35 (s, 1H), 5.16 – 5.05 (m, 1H), 3.82 (t,  $J$ =9.0 Hz, 5H), 3.27 (ddd,  $J$ =19.2, 13.8, 8.3 Hz, 2H). **<sup>19</sup>F NMR** (377 MHz, CDCl<sub>3</sub>)  $\delta$  = -65.28. **<sup>13</sup>C NMR** (101 MHz, <sup>19</sup>F coupled, CDCl<sub>3</sub>)  $\delta$  = 171.79, 168.68, 136.56, 135.74, 132.27, 130.56, 129.23, 129.05, 128.70, 128.29, 127.42, 127.27, 127.01, 124.47, 53.41, 52.47, 37.93, 36.50, 36.21, 35.91, 35.62. **HRMS** (ESI):  $m/z$  calculated for C<sub>17</sub>H<sub>16</sub>F<sub>3</sub>NO [M+H]<sup>+</sup>: 366.1317, found: 366.1312. ee = 99%. HPLC with an AS-H column at 254 nm (2-propanol: hexane = 10:90), 1.0 mL/min; major enantiomer  $t_{\text{major}}$  = 11.81 min.

## V. Mechanistic Studies

### V-1. Deuterium labeling test

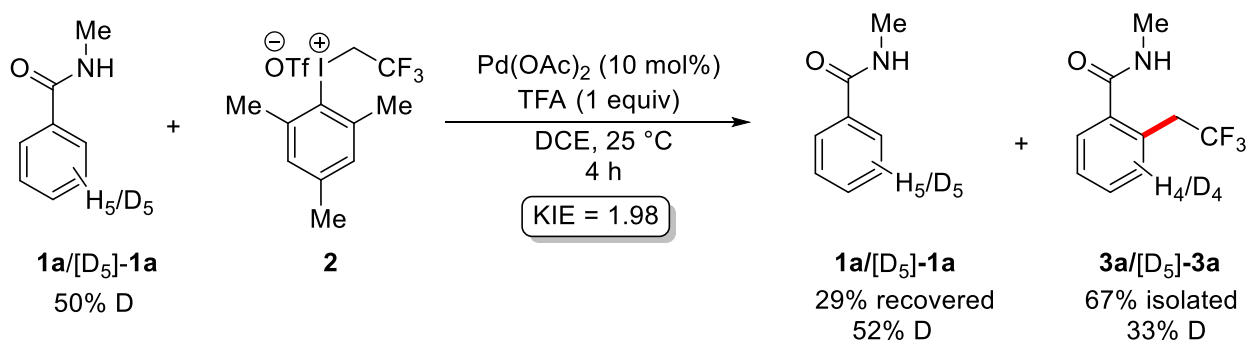

To a screw cap vial equipped with a stirbar were added *N*-methylbenzamide (**1a**, 15 mg, 0.1 mmol), *N*-methylbenzamide (**1a-D<sub>5</sub>**, 15 mg, 0.1 mmol), mesityl(2,2,2-trifluoroethyl)iodonium trifluoromethanesulfonate (**2**, 127 mg, 0.24 mmol), Pd(OAc)<sub>2</sub> (5.0 mg, 0.01 mmol, 10 mol %) and 1,2-dichloroethane (1.0 mL) under atmospheric conditions. Trifluoroacetic acid (0.1 mmol) was added instantly and the vessel was capped for 4 hours. After reaction mixture was washed with NaHCO<sub>3</sub> solution and extracted with EtOAc (3 x 20 mL). Organic solvents were removed under reduced pressure and the residue was purified by chromatography on silica gel (*n*-hexane/EtOAc) to obtain the desired products with recovery of starting materials.

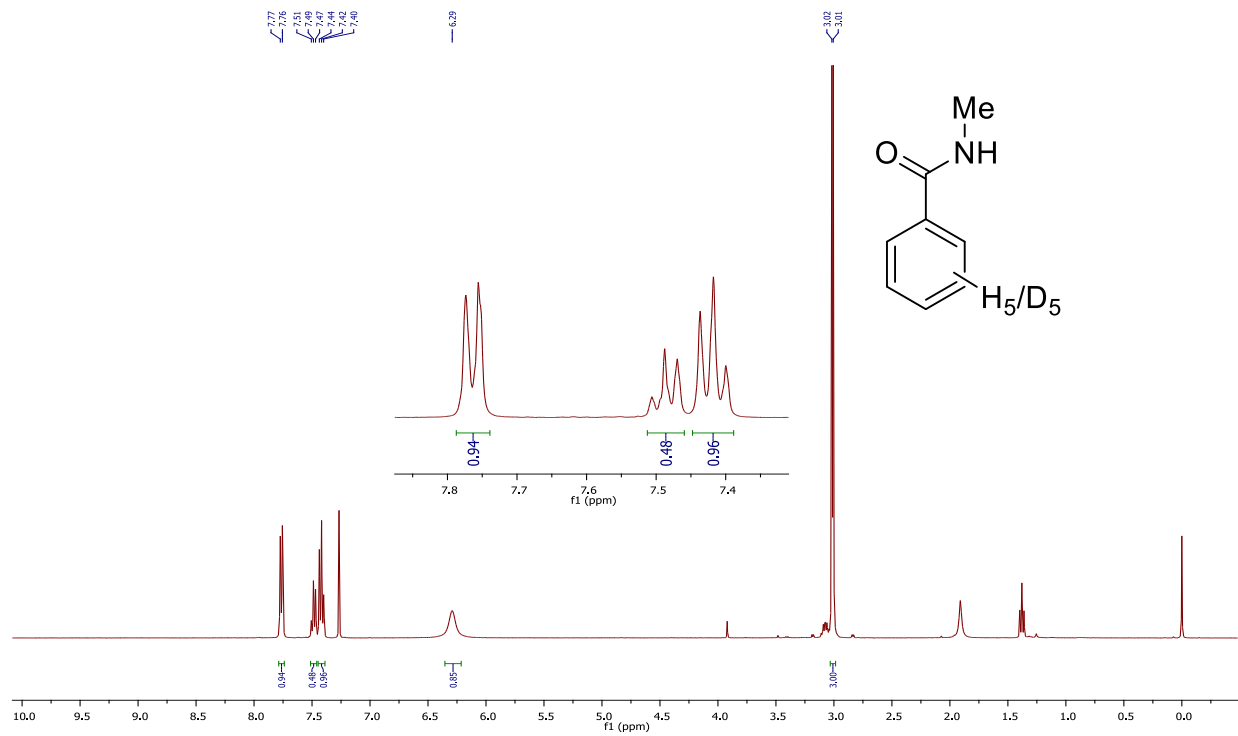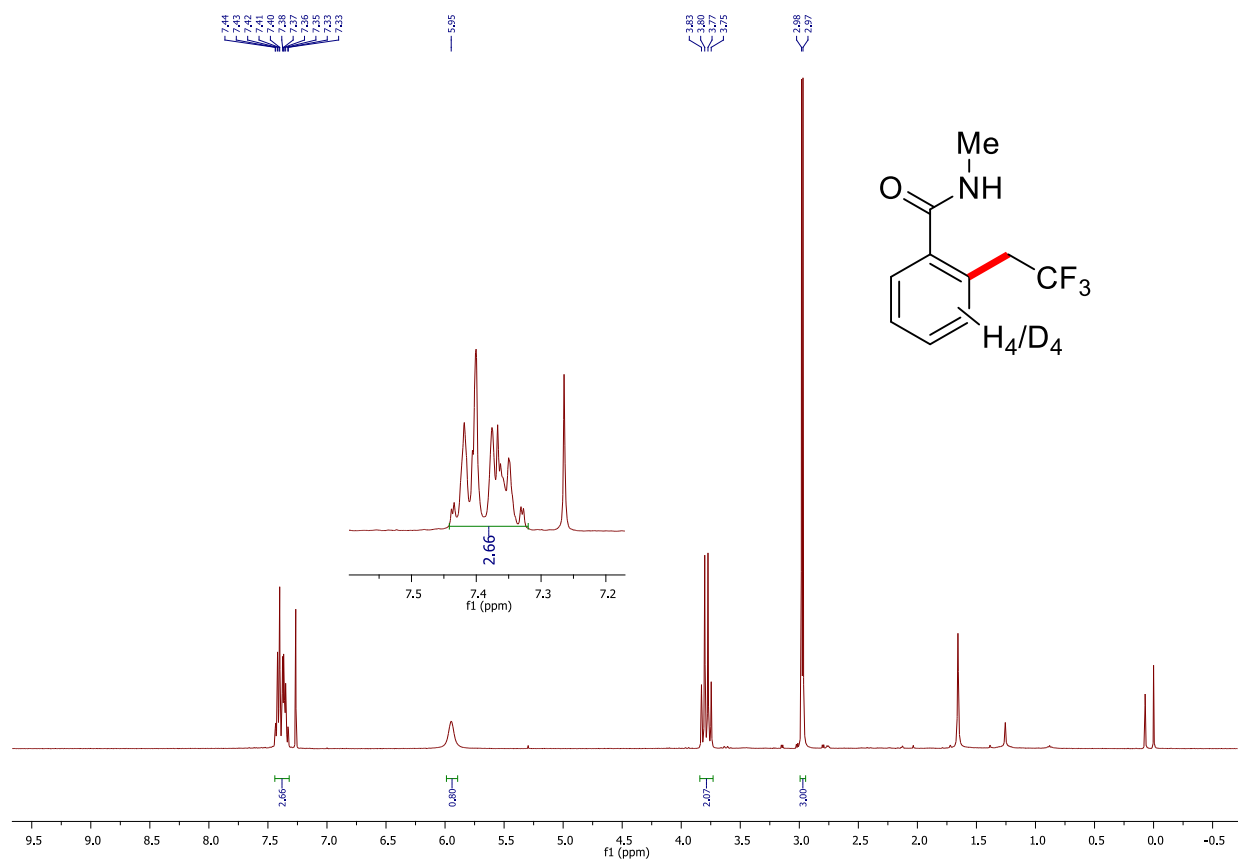

## V-2 Procedure for the synthesis of Palladacycle compound

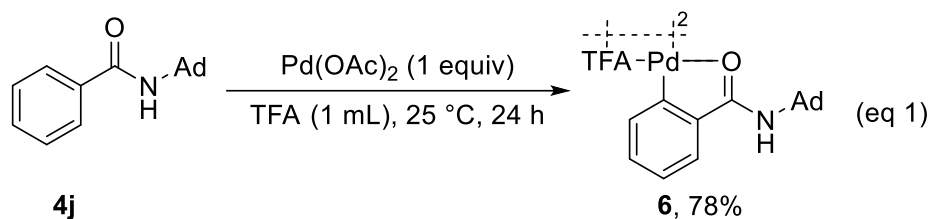

To a 15ml sealed-tube were added N-((3s,5s,7s)adamantan-1-yl)benzamide (50 mg, 0.20 mmol), Pd(OAc)<sub>2</sub> (44mg, 0.20 mmol) and 1ml TFA. The tube was sealed and stirred at rt for 24h. Then the reaction mixture was filtered and washed with hexane to give the desired TFA bridged palladacycle product **6** as a yellowish green solid (78 mg, 82%). The yellowish green solid was then recrystallized from hexane/DCE to give crystal that can be characterized by X-ray crystallography. **MP** = °C. **<sup>1</sup>H NMR** (400 MHz, CD<sub>2</sub>Cl<sub>2</sub>) δ = 7.15 (s, 2H), 6.97 (s, 1H), 6.71 (d, *J*=34.4 Hz, 1H), 6.34 (s, 1H), 5.09 (s, 2H), 2.13 (s, 9H), 1.70 (s, 6H). **<sup>19</sup>F NMR** (377 MHz, CD<sub>2</sub>Cl<sub>2</sub>) δ = -73.88, -74.26, -74.35, -74.83, -76.08. **<sup>13</sup>C NMR** (101 MHz, <sup>19</sup>F coupled, CD<sub>2</sub>Cl<sub>2</sub>) δ = 179.11, 143.96, 140.64, 131.93, 131.05, 130.97, 130.86, 130.81, 125.03, 124.33, 54.82, 41.08, 35.97, 29.54.

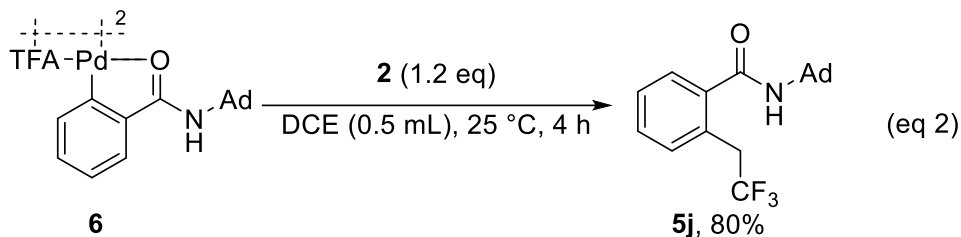

A 4 mL screw-cap vial equipped with a stirring bar was charged with *palladacycle* compound (**6**, 20.0 mg, 0.2 mmol) and *mesityl(2,2,2-trifluoroethyl)iodonium trifluoromethanesulfonate* (**2**, 0.22 mmol). Then 0.5 mL *DCE* was added and started to stir the dark brown mixture at room temperature. After the completion of the reaction, Reaction mixture was washed with NaHCO<sub>3</sub> solution and extracted with EtOAc (3 x 20mL). The combined organics were dried over MgSO<sub>4</sub>, filtered and dried under vacuum to get the crude product, which was further purified by flash column chromatography using EtOAc and Hexane solvent system to furnish desired product **5j** in 80% yield.

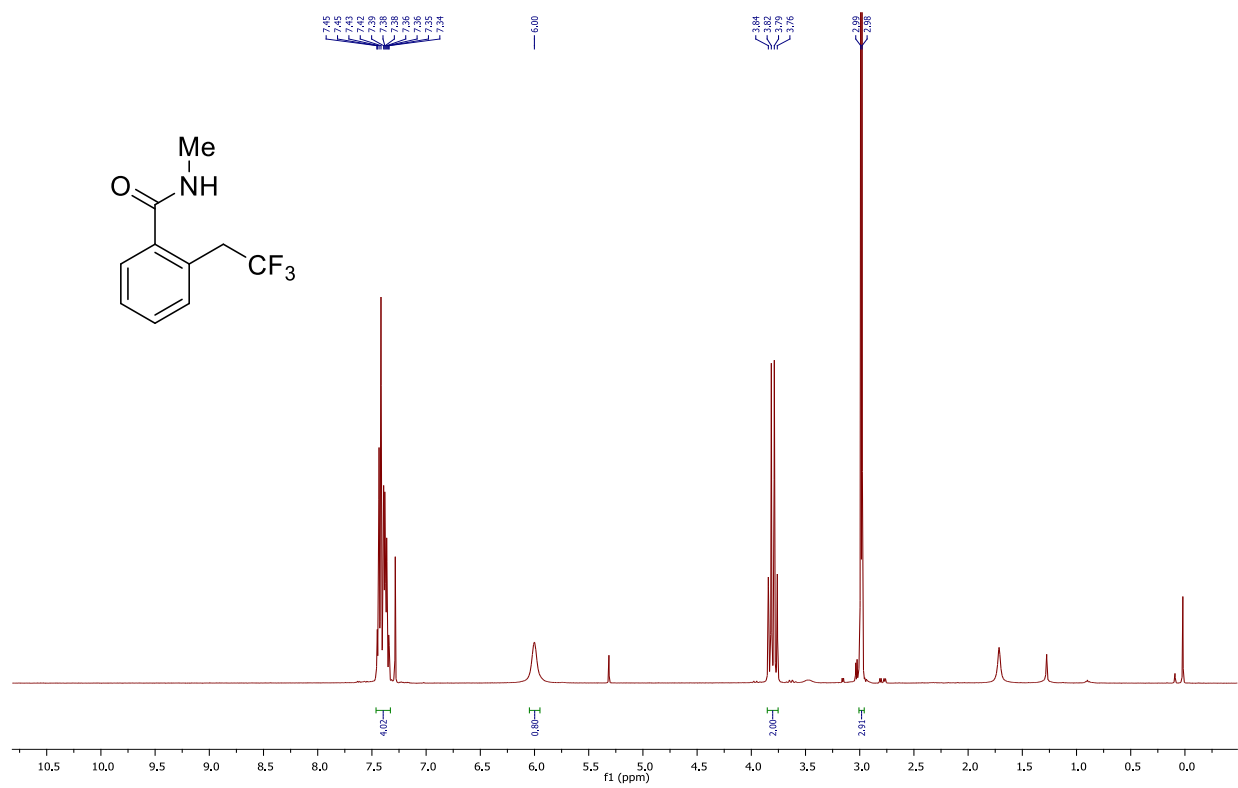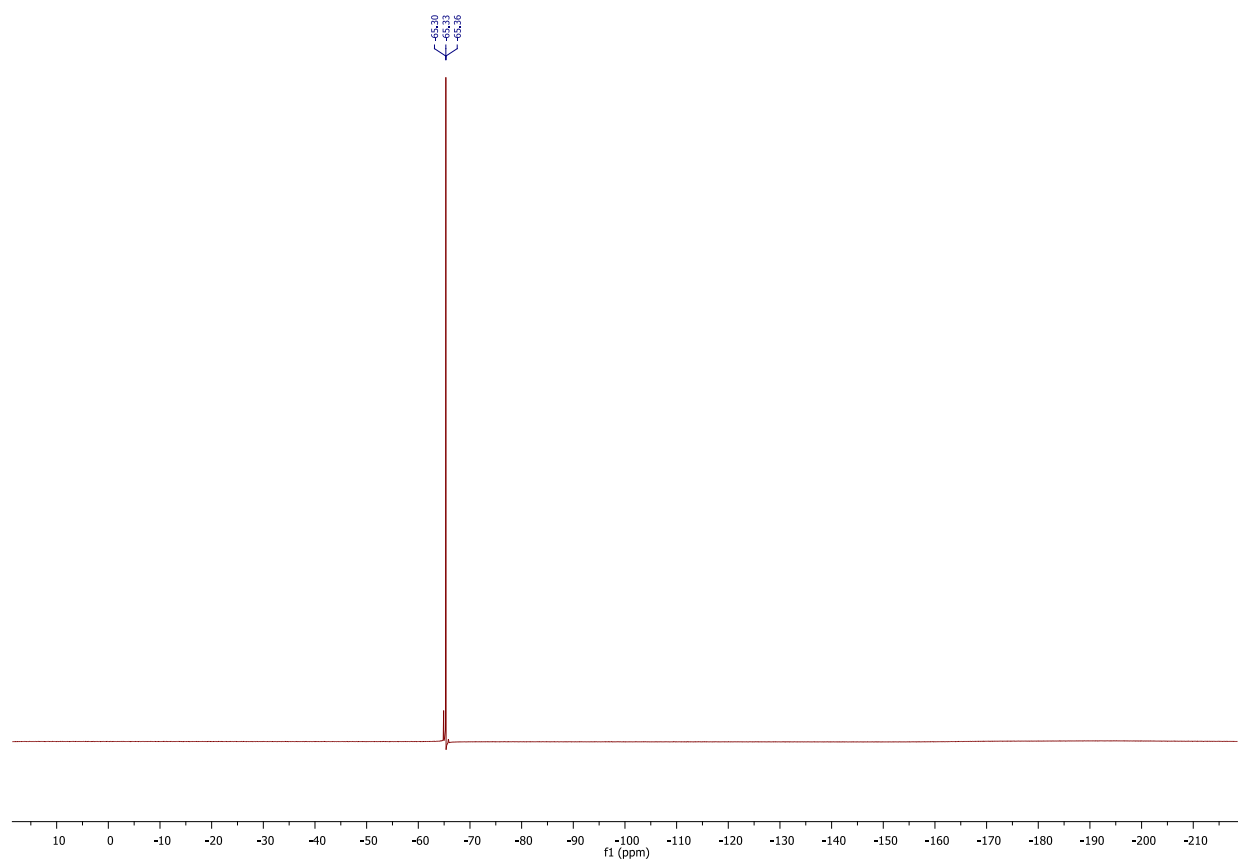

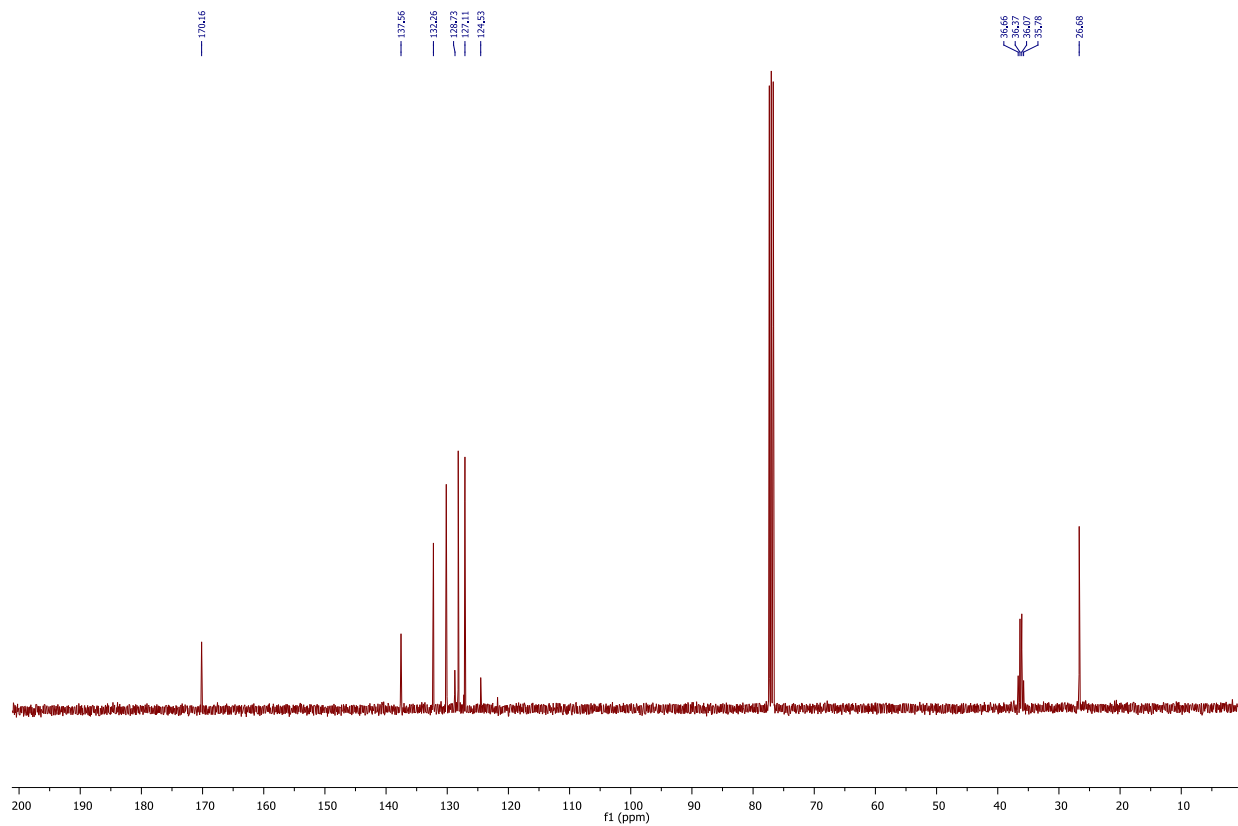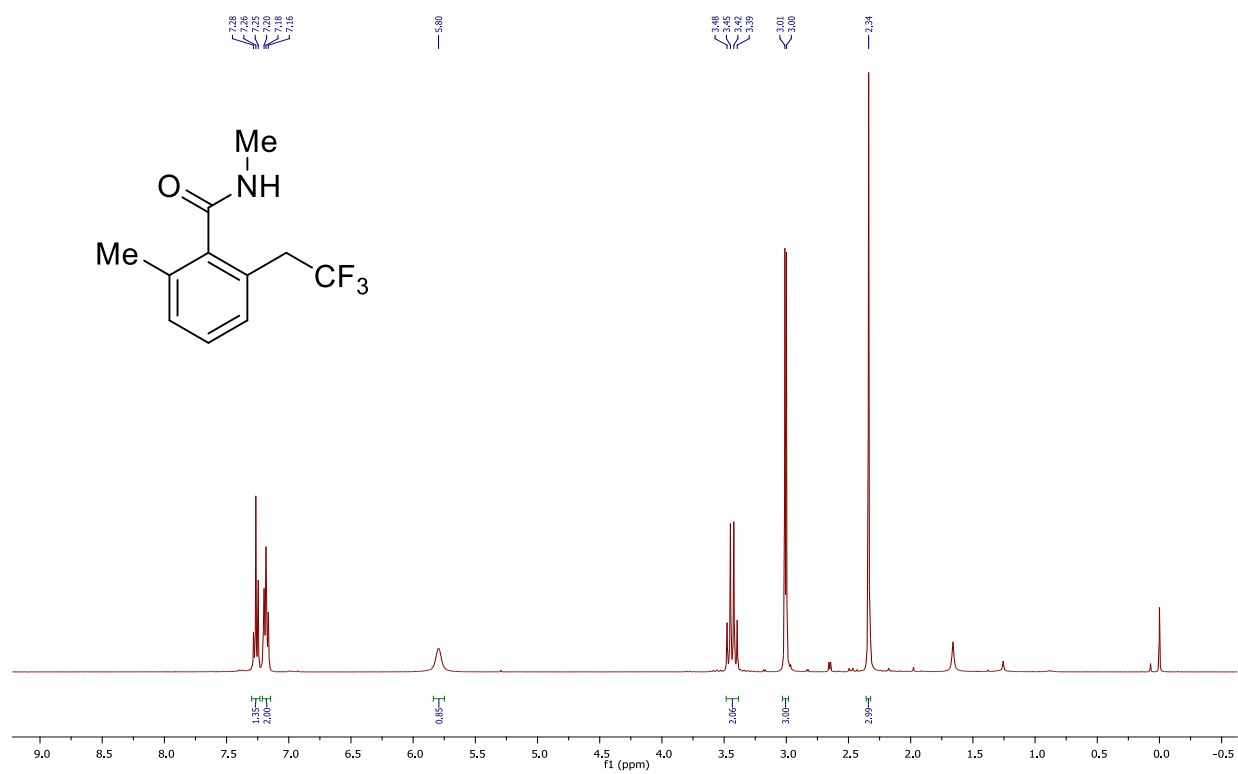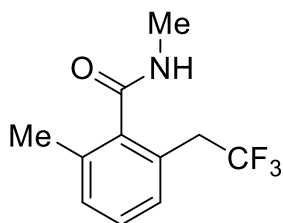



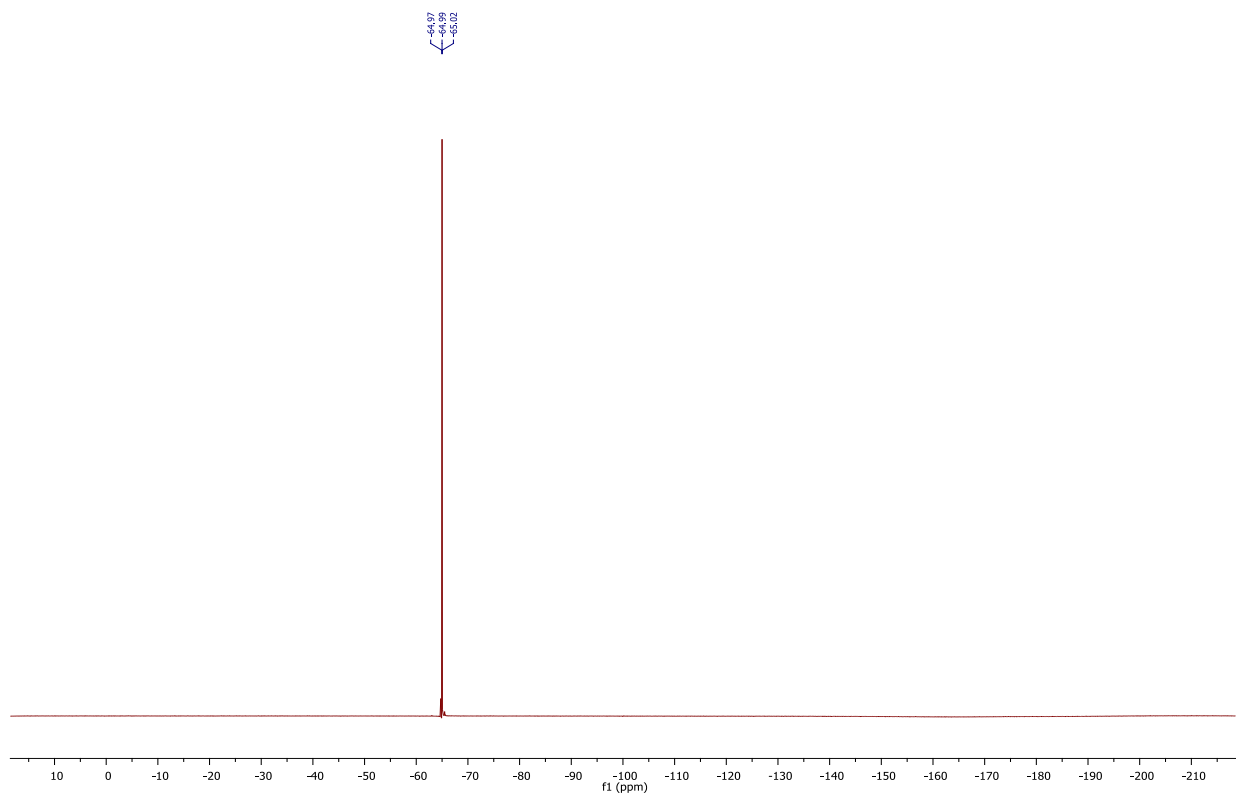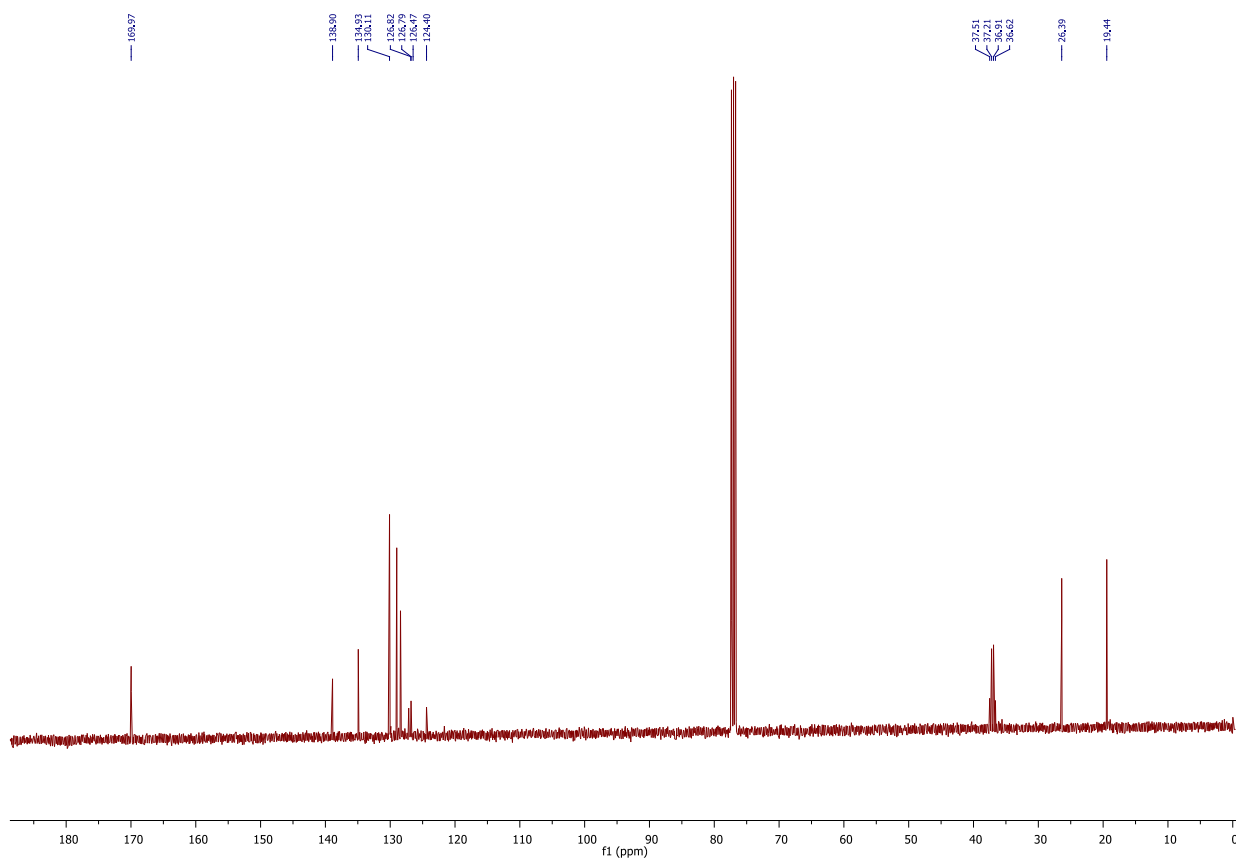

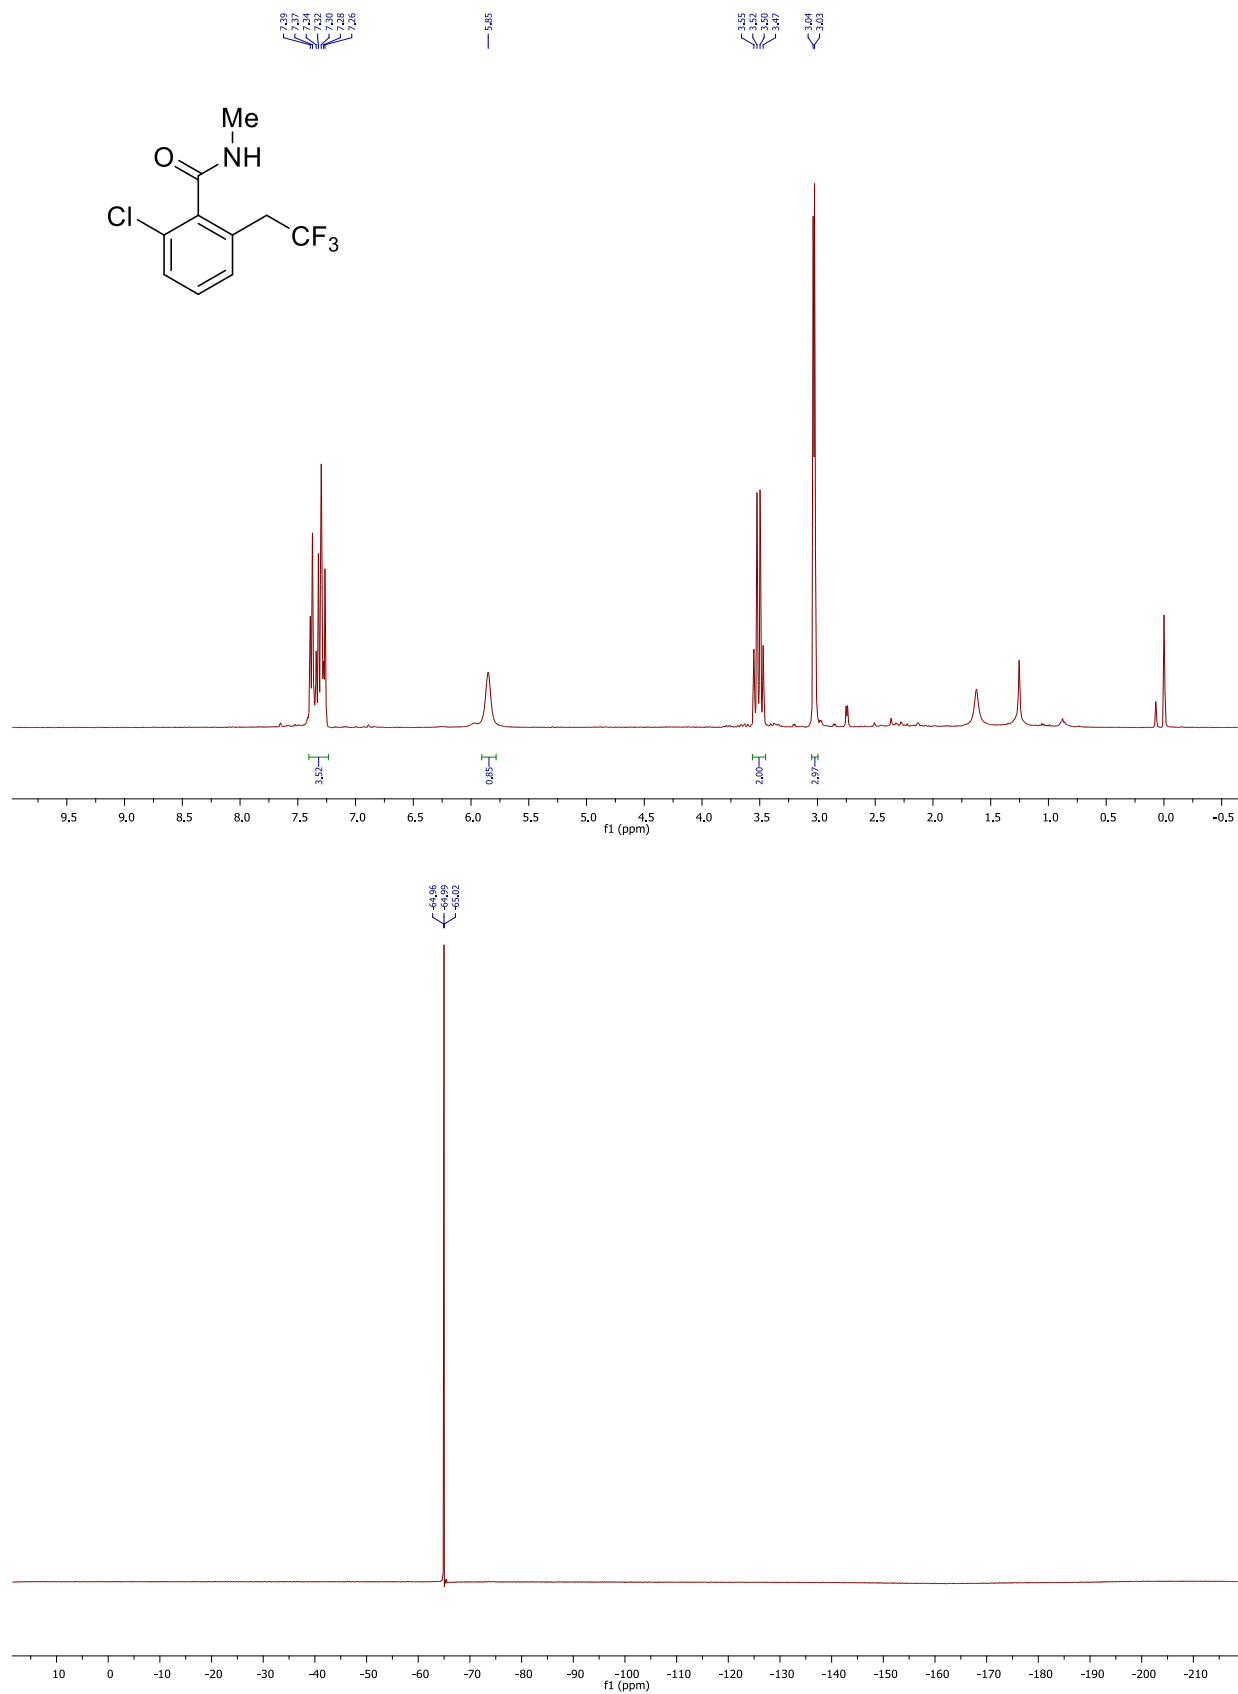

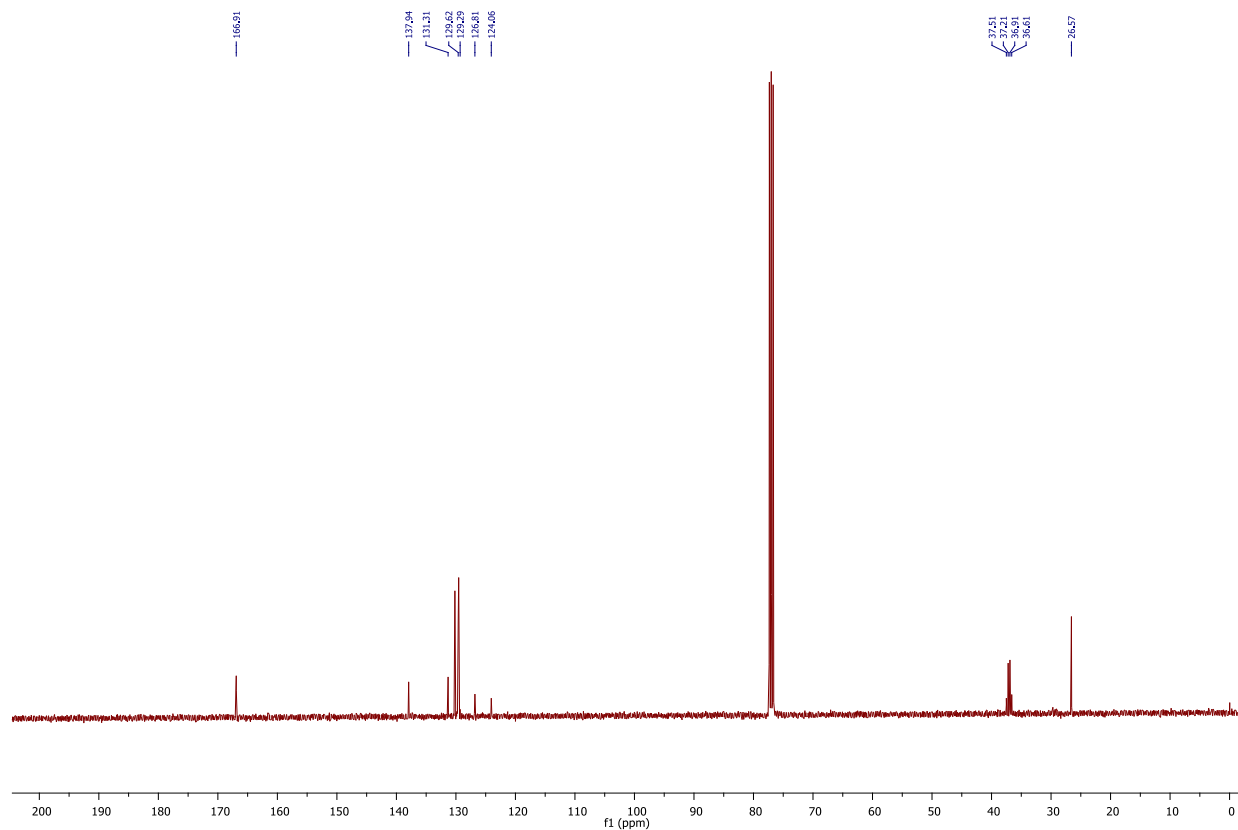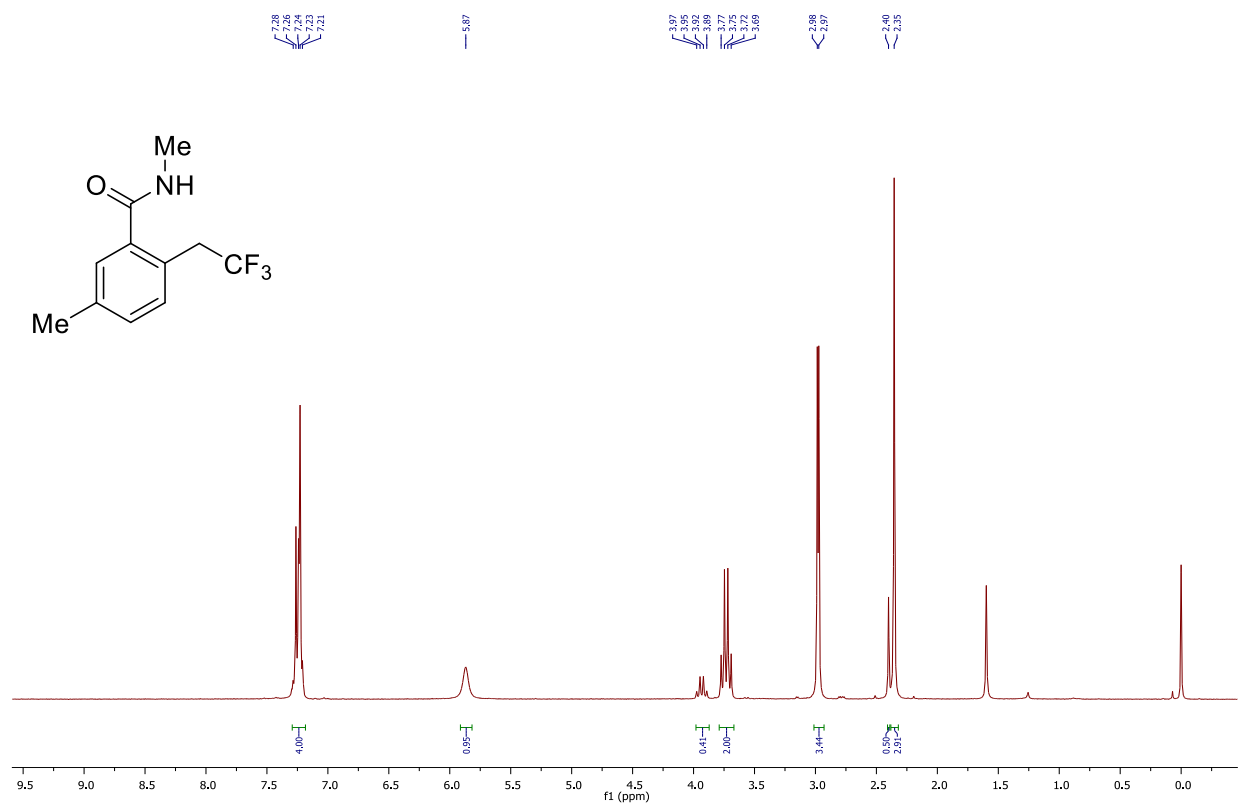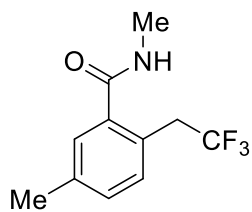

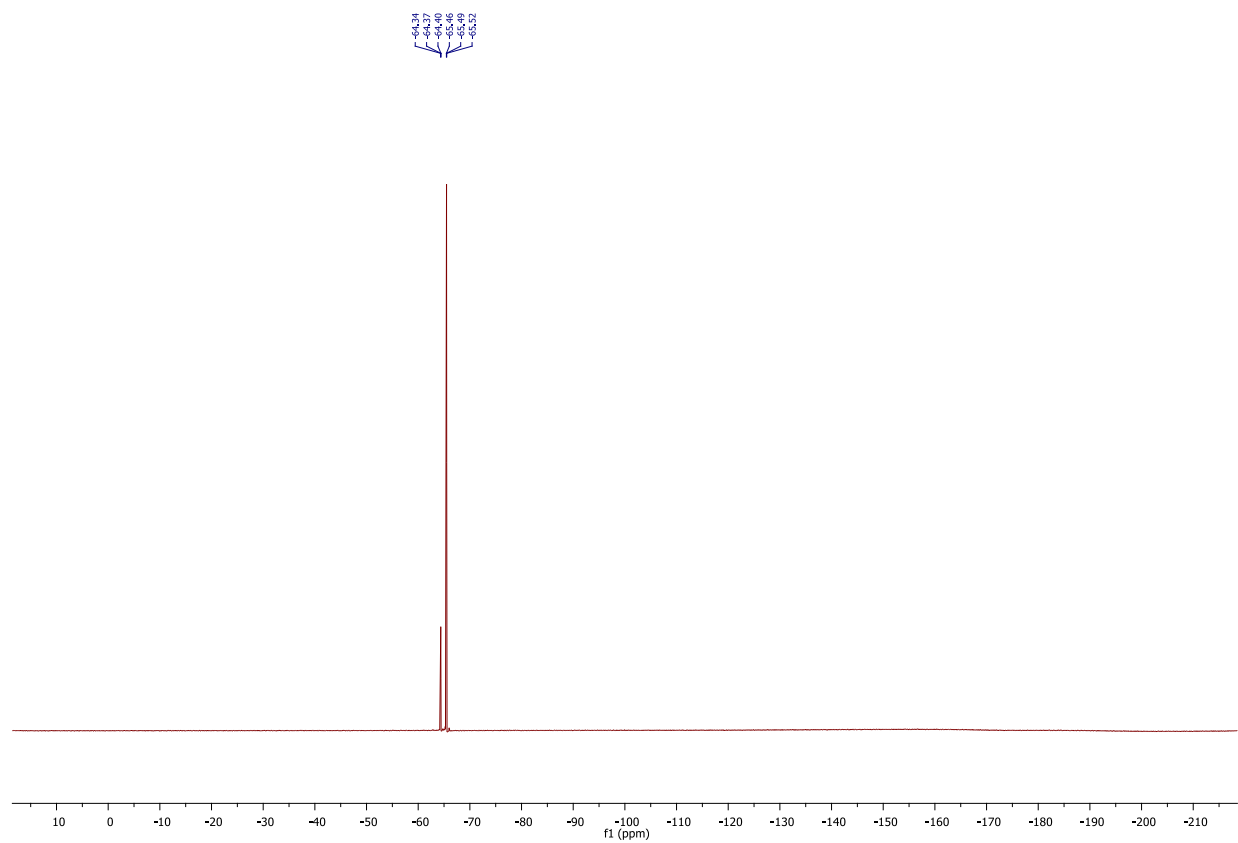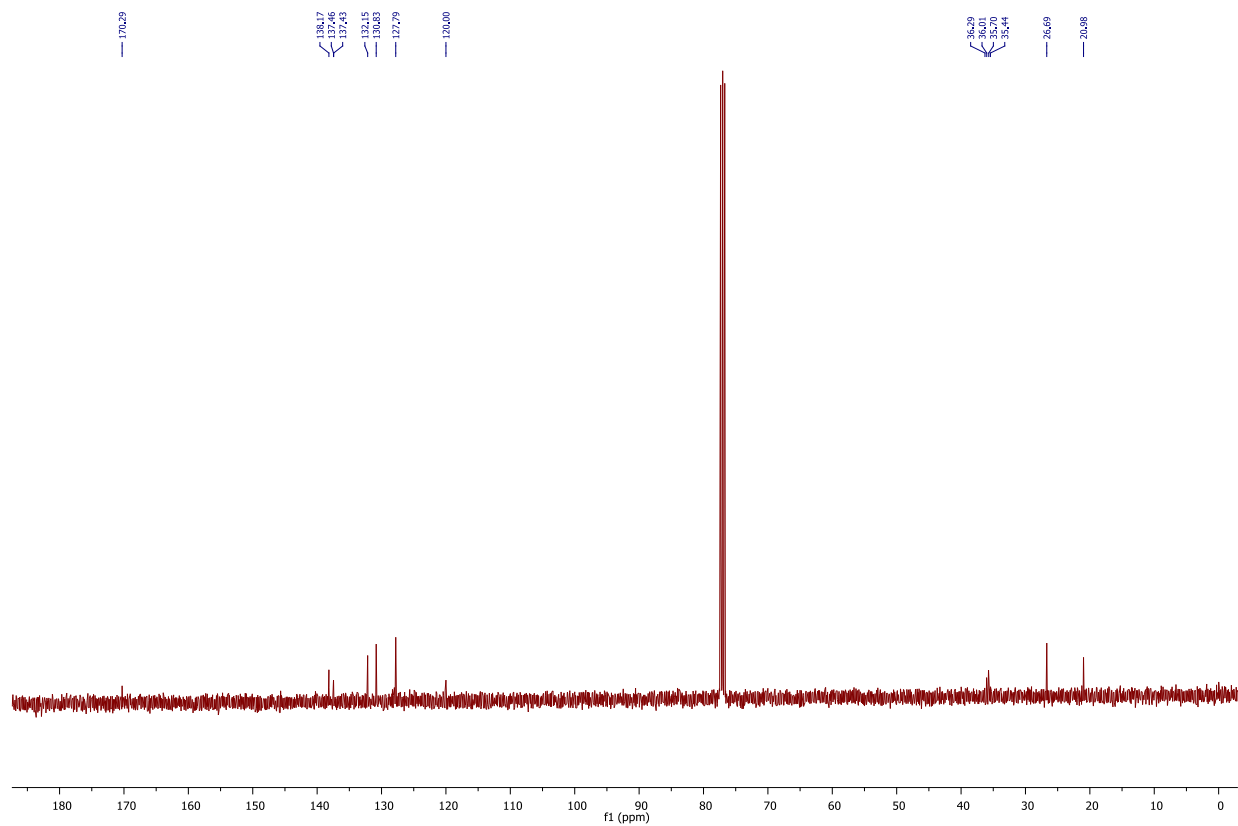

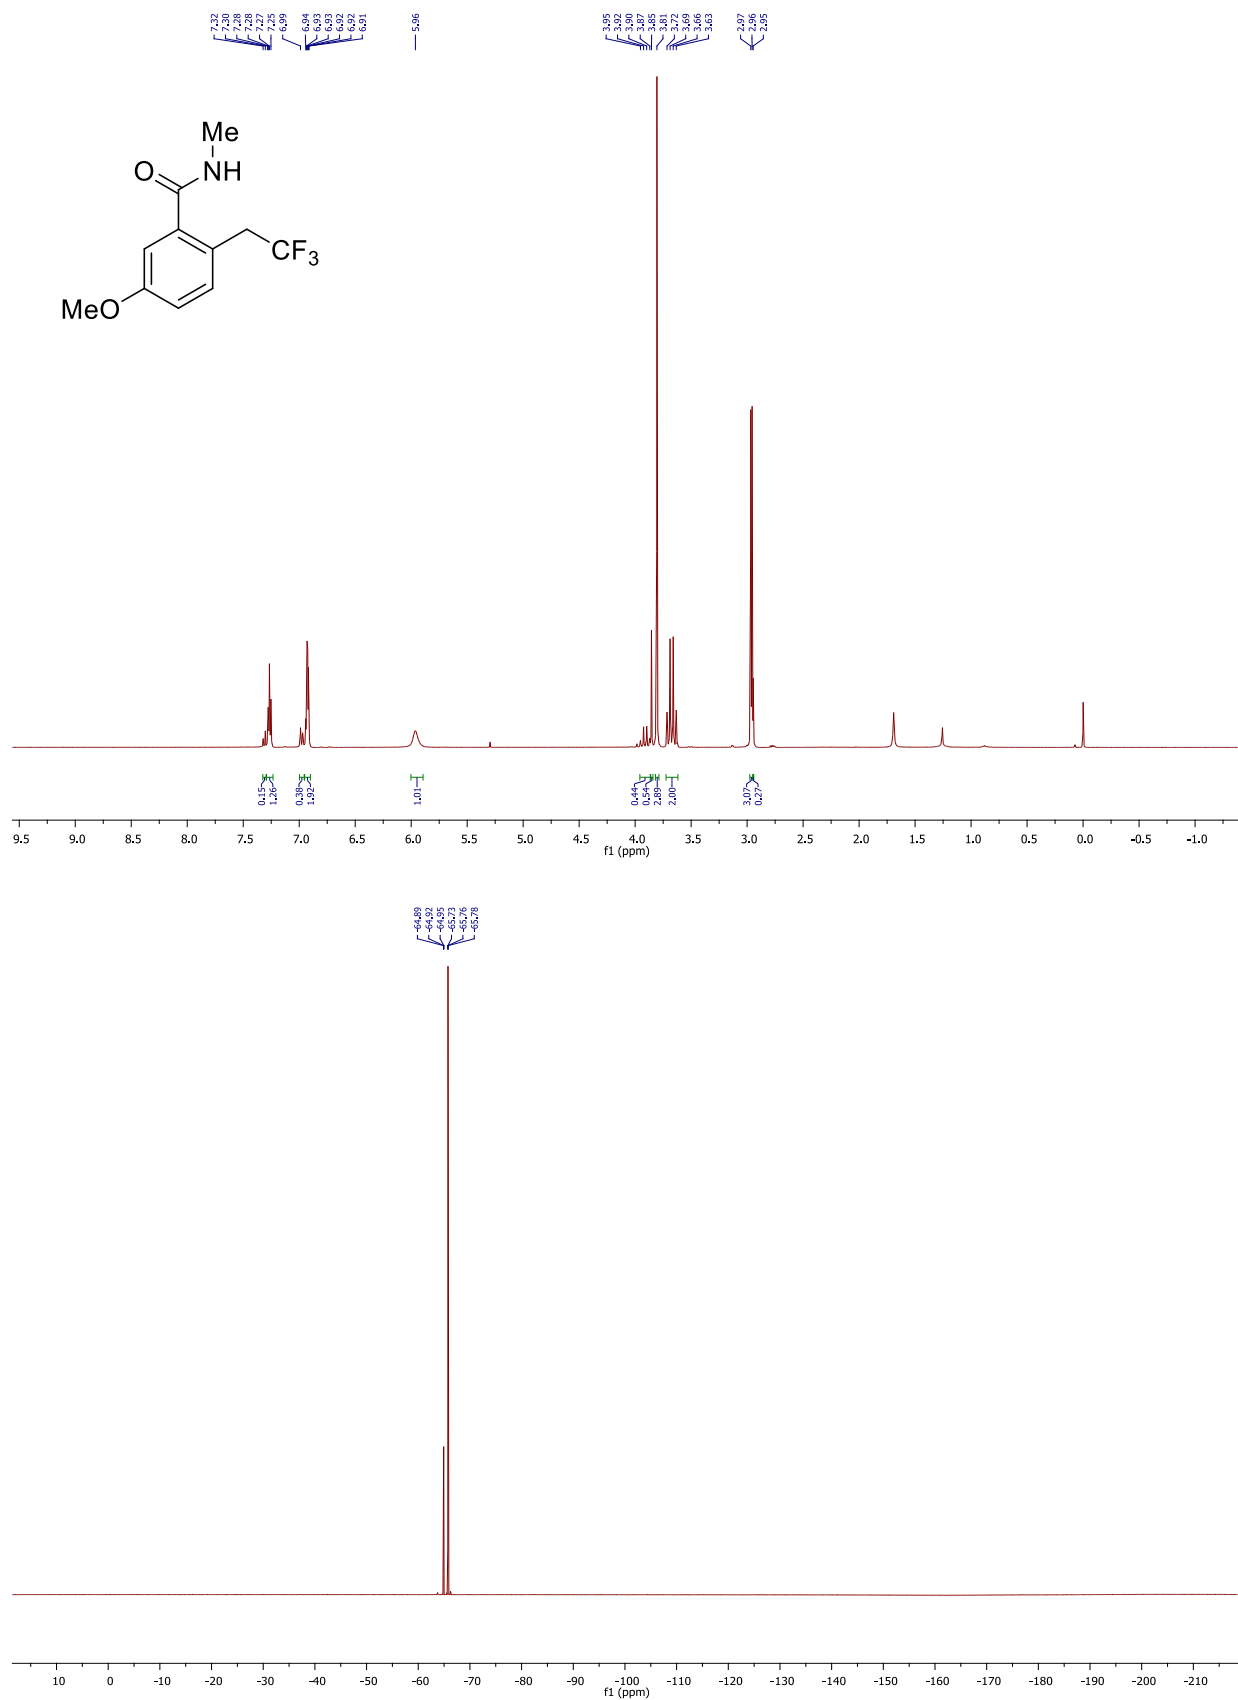

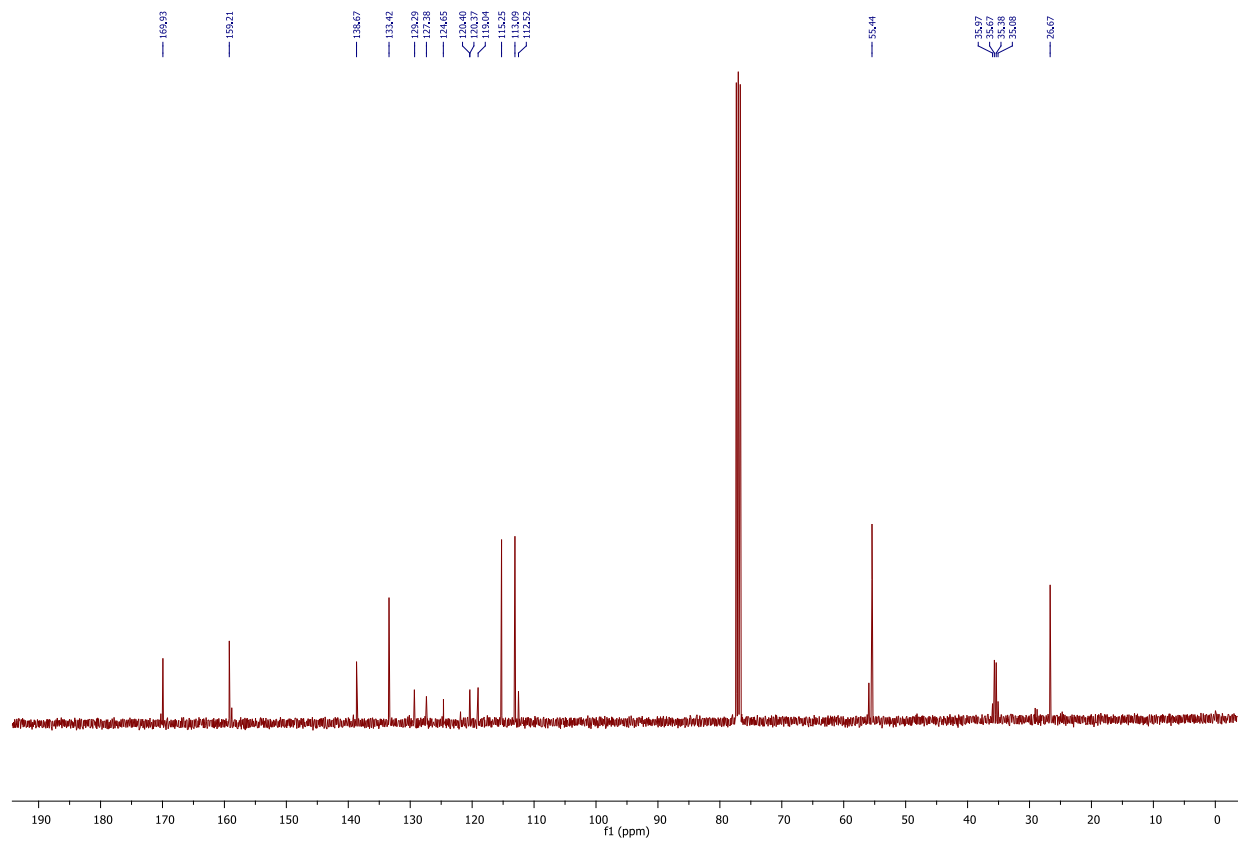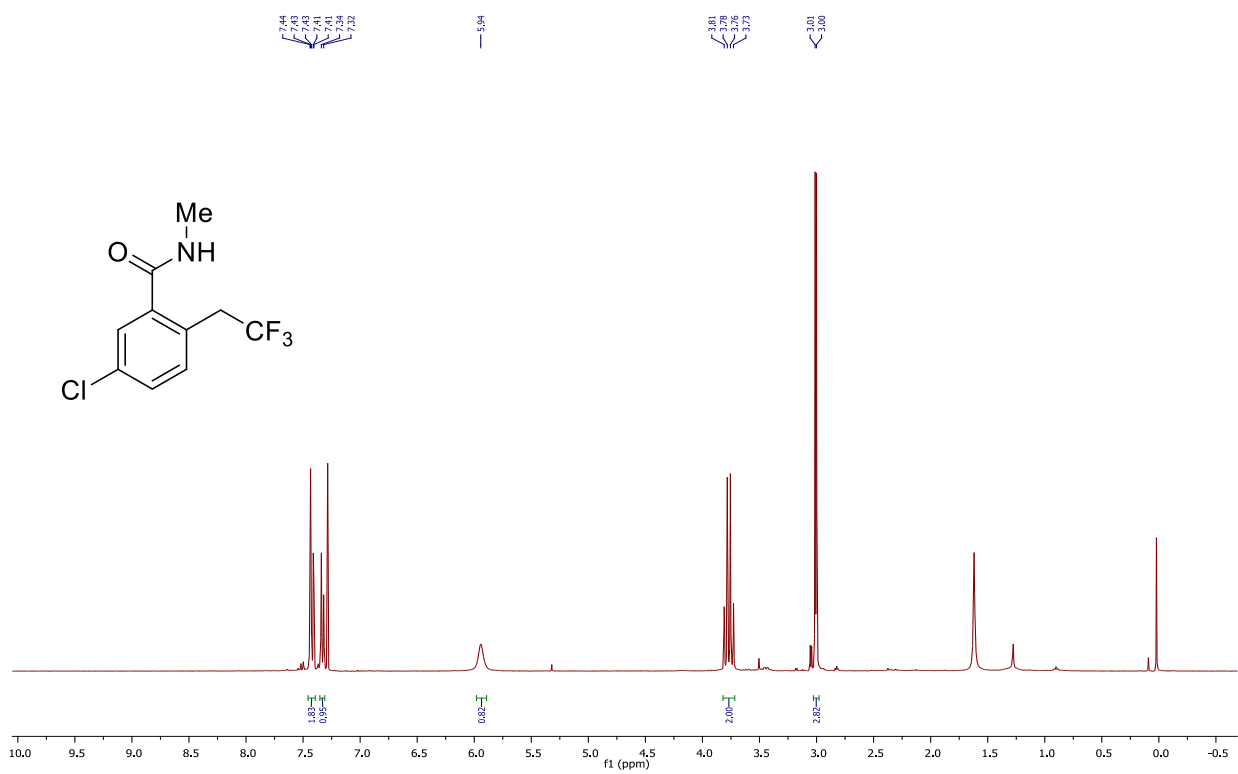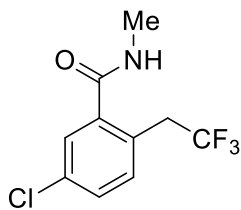

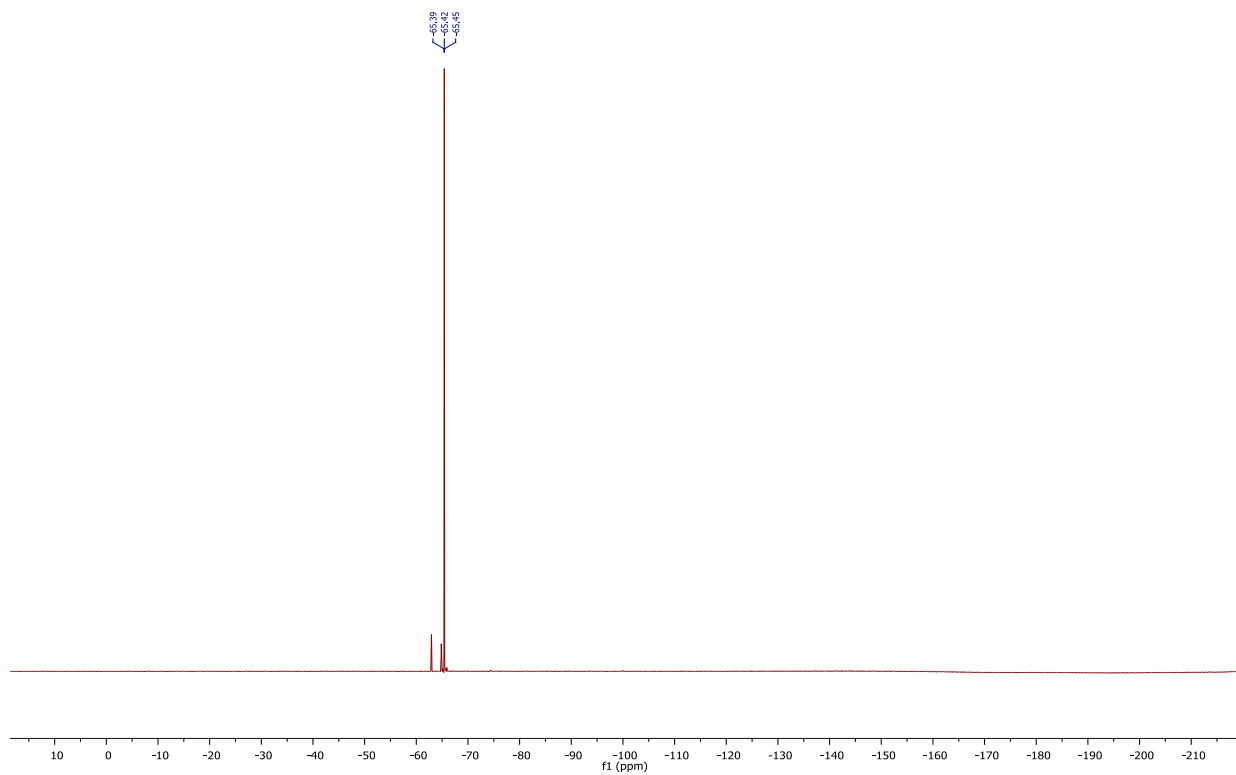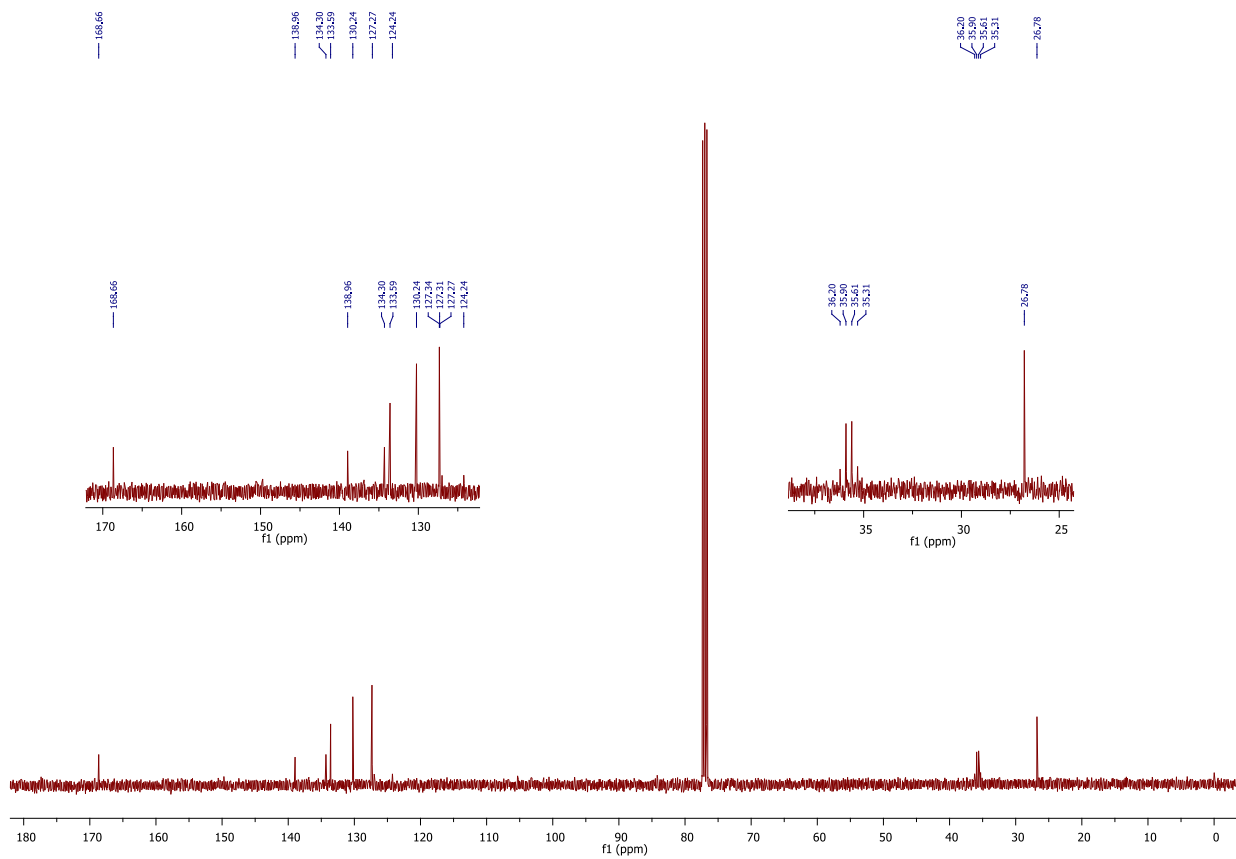

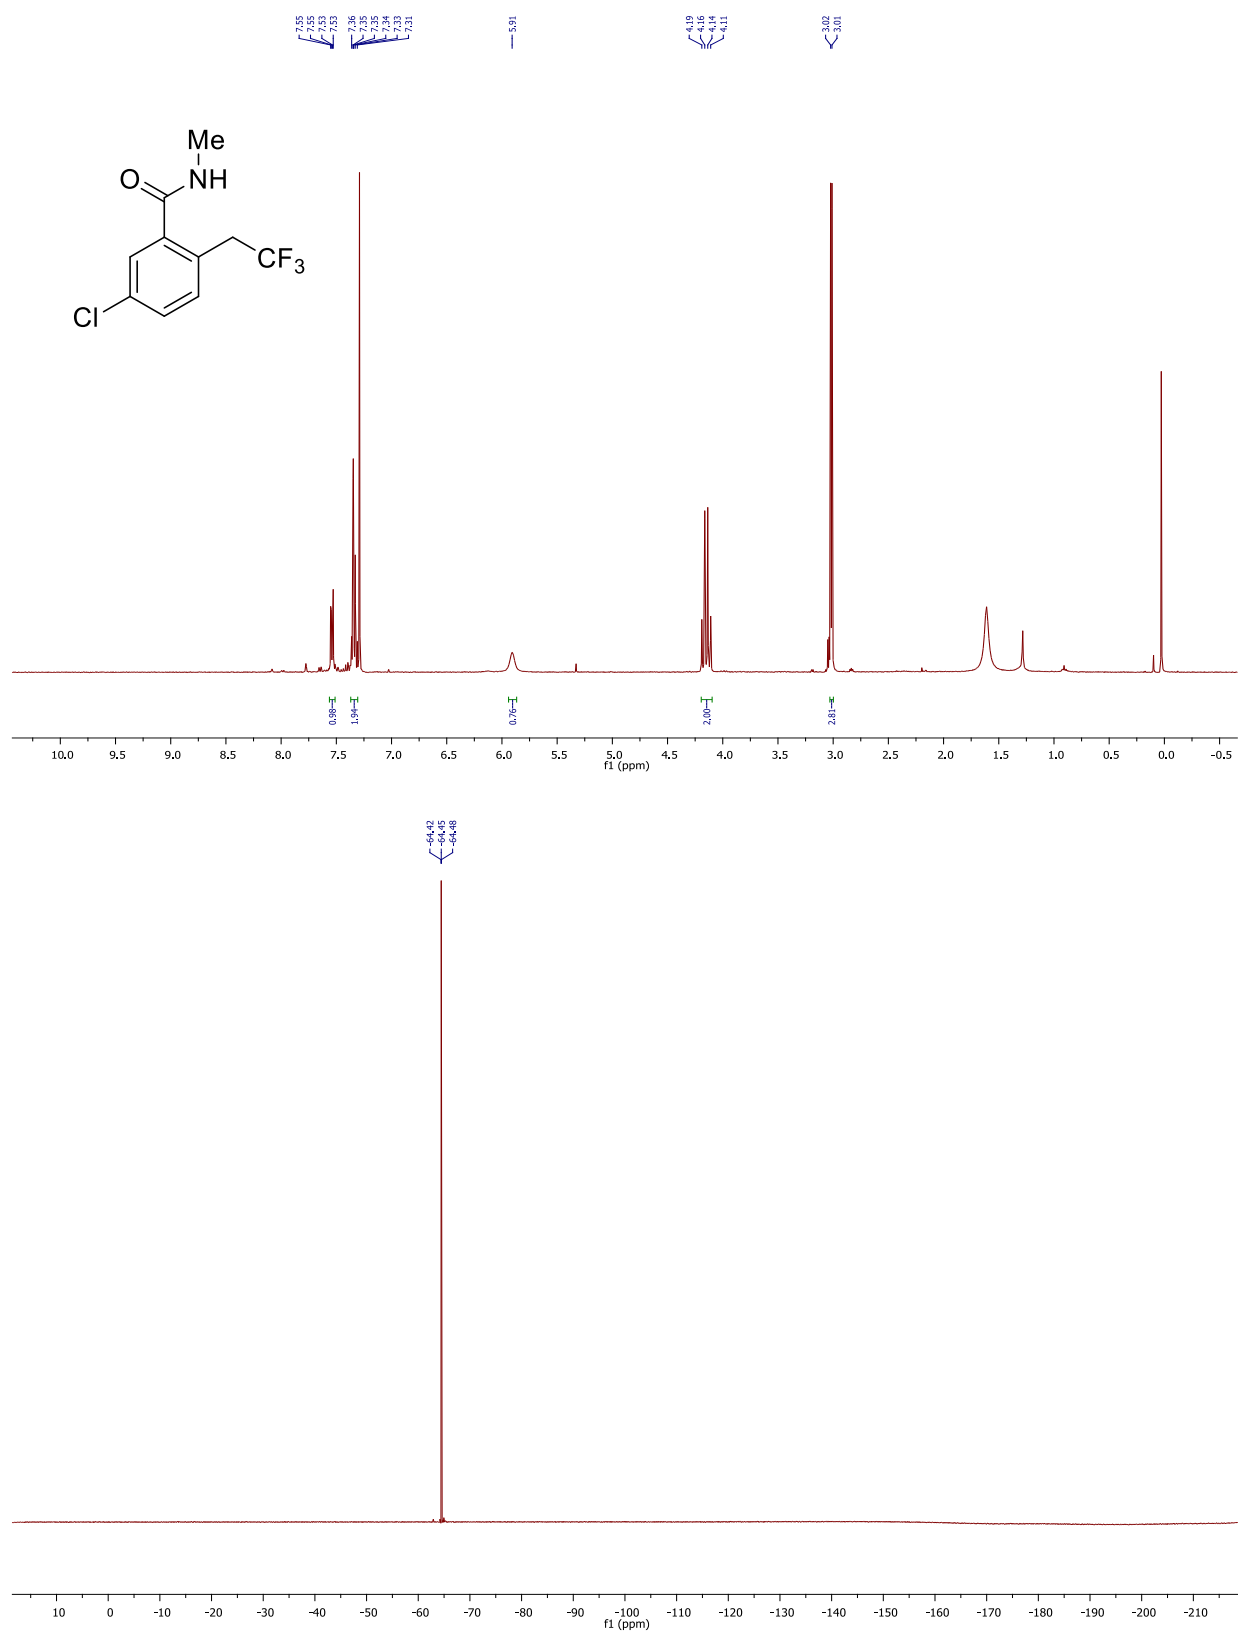



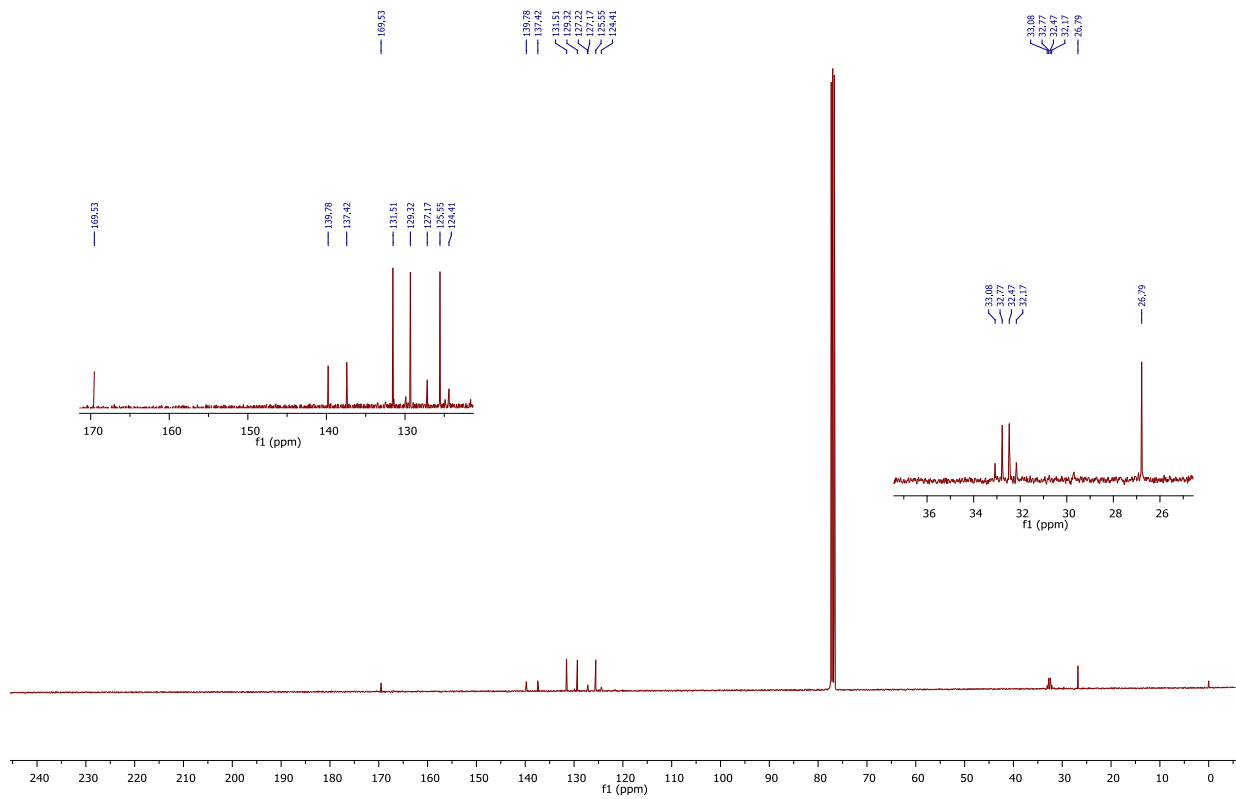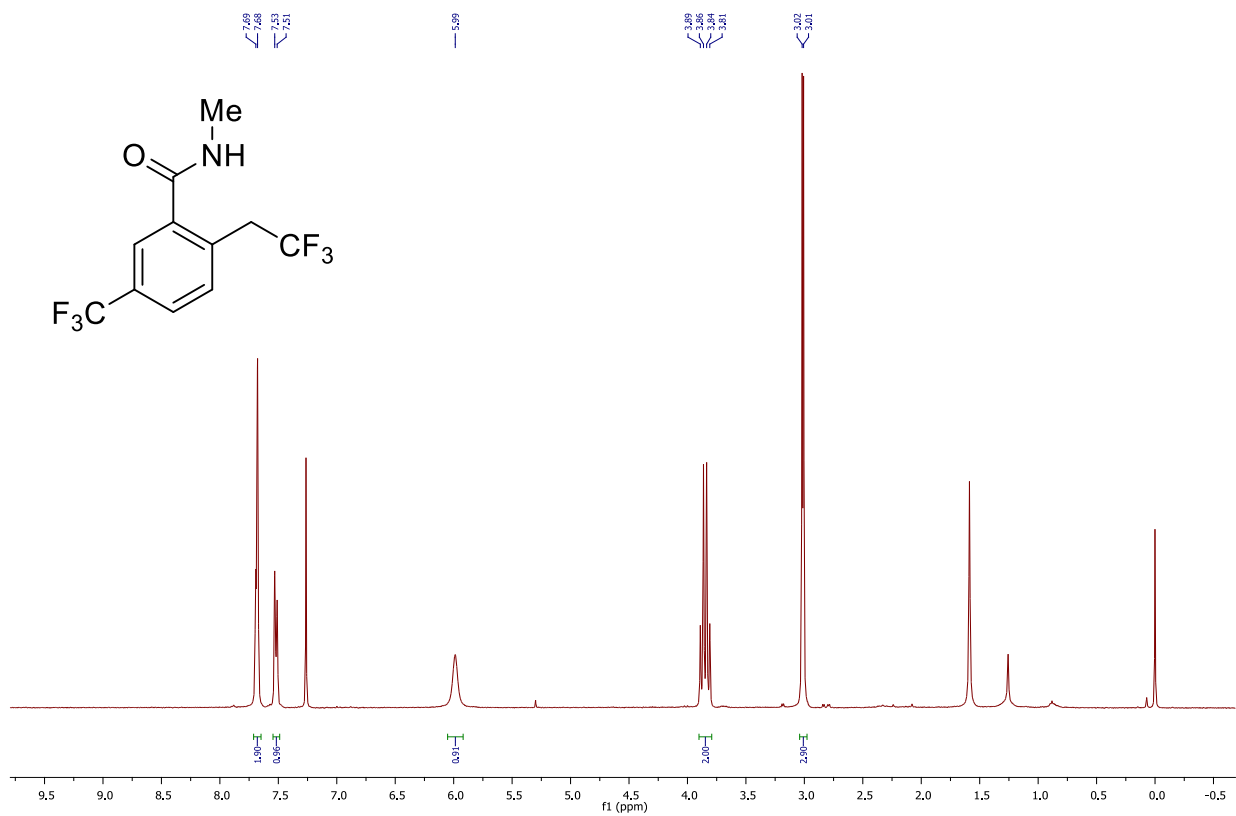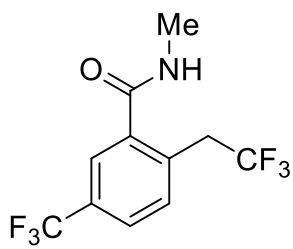

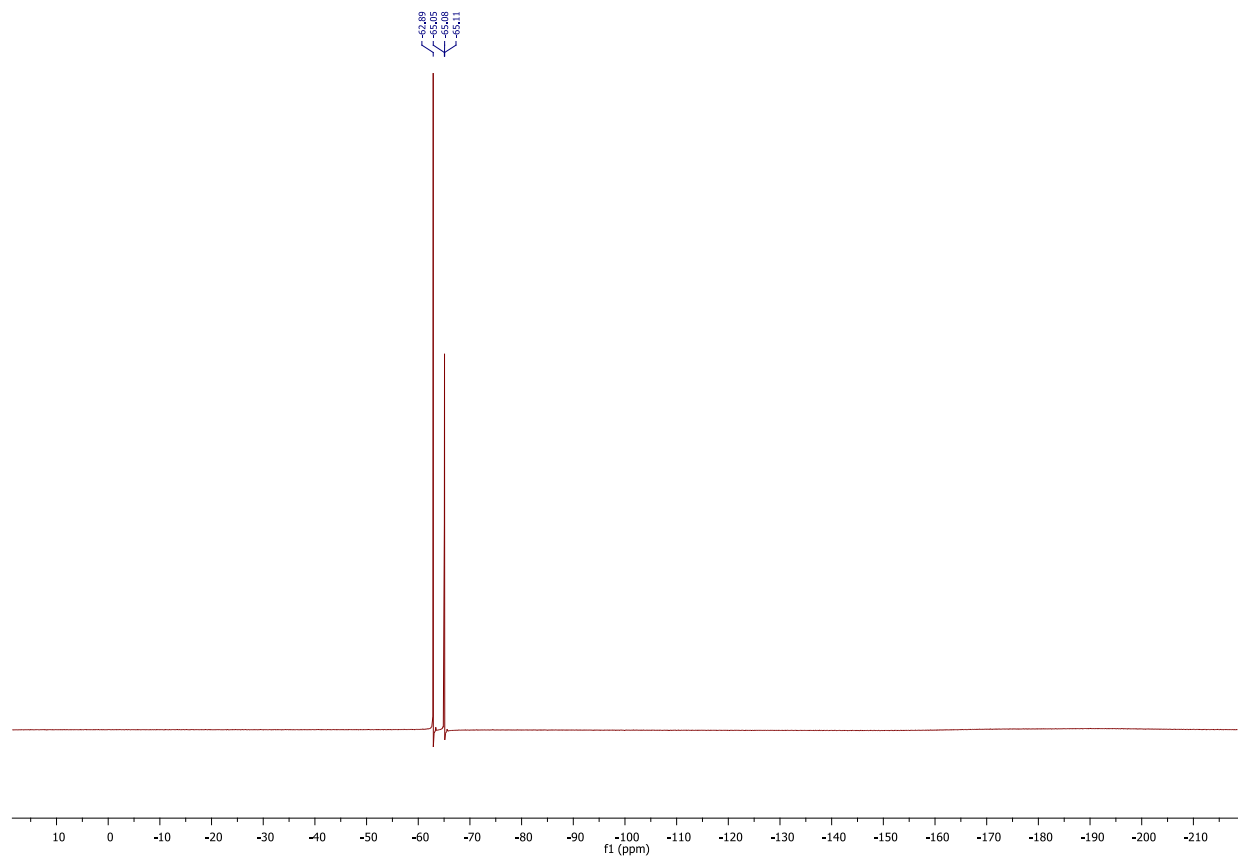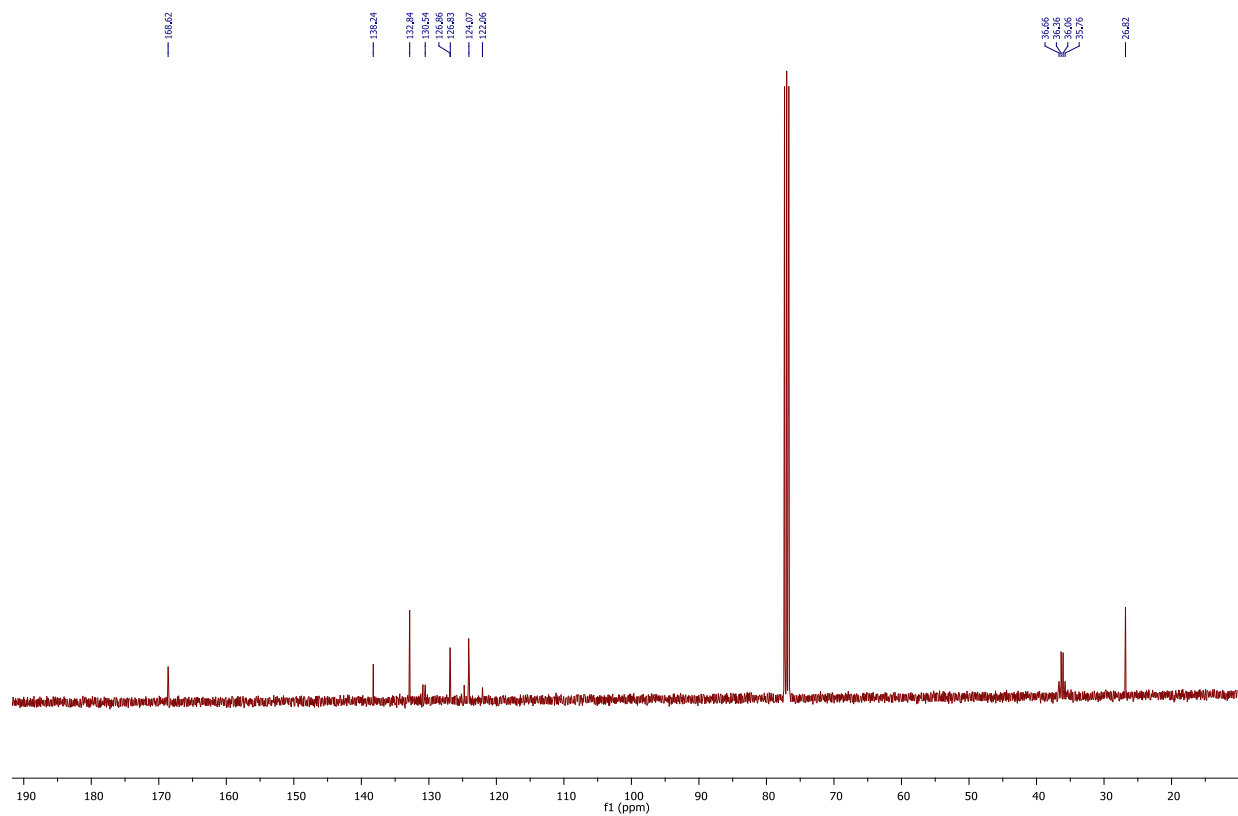

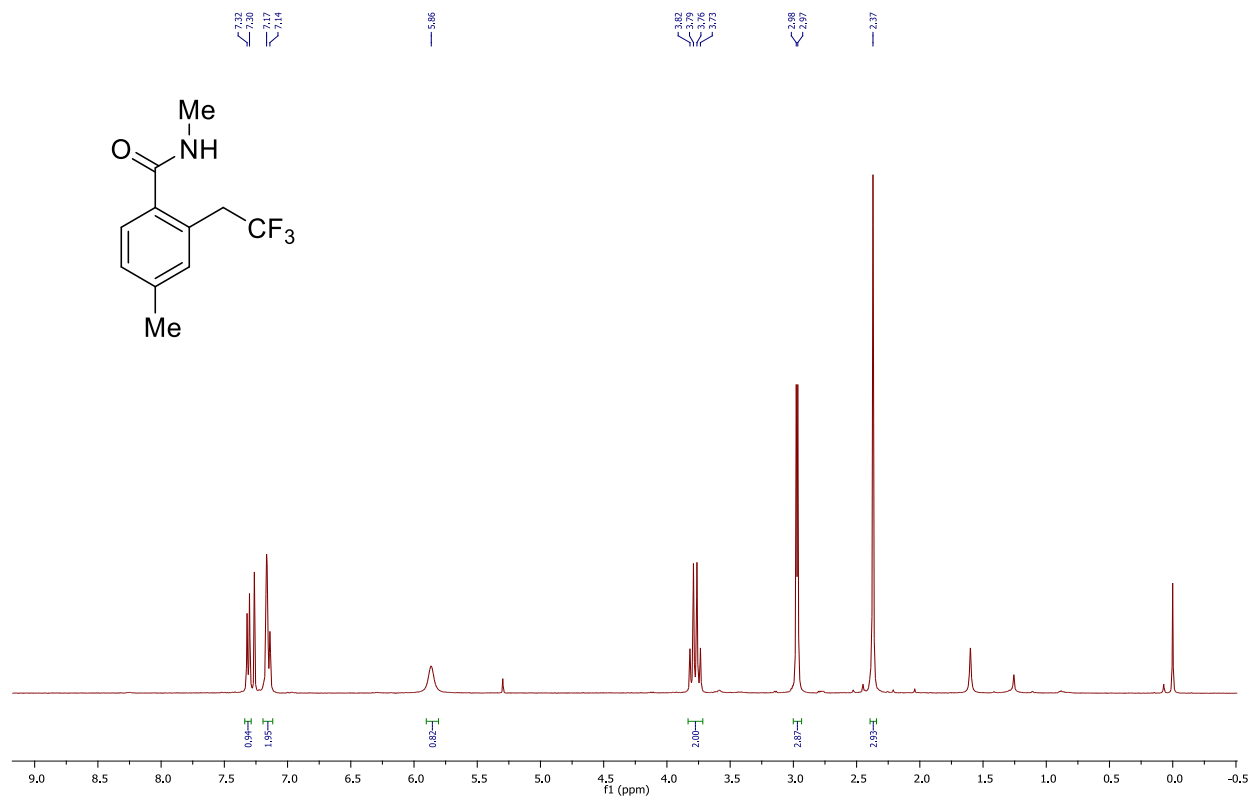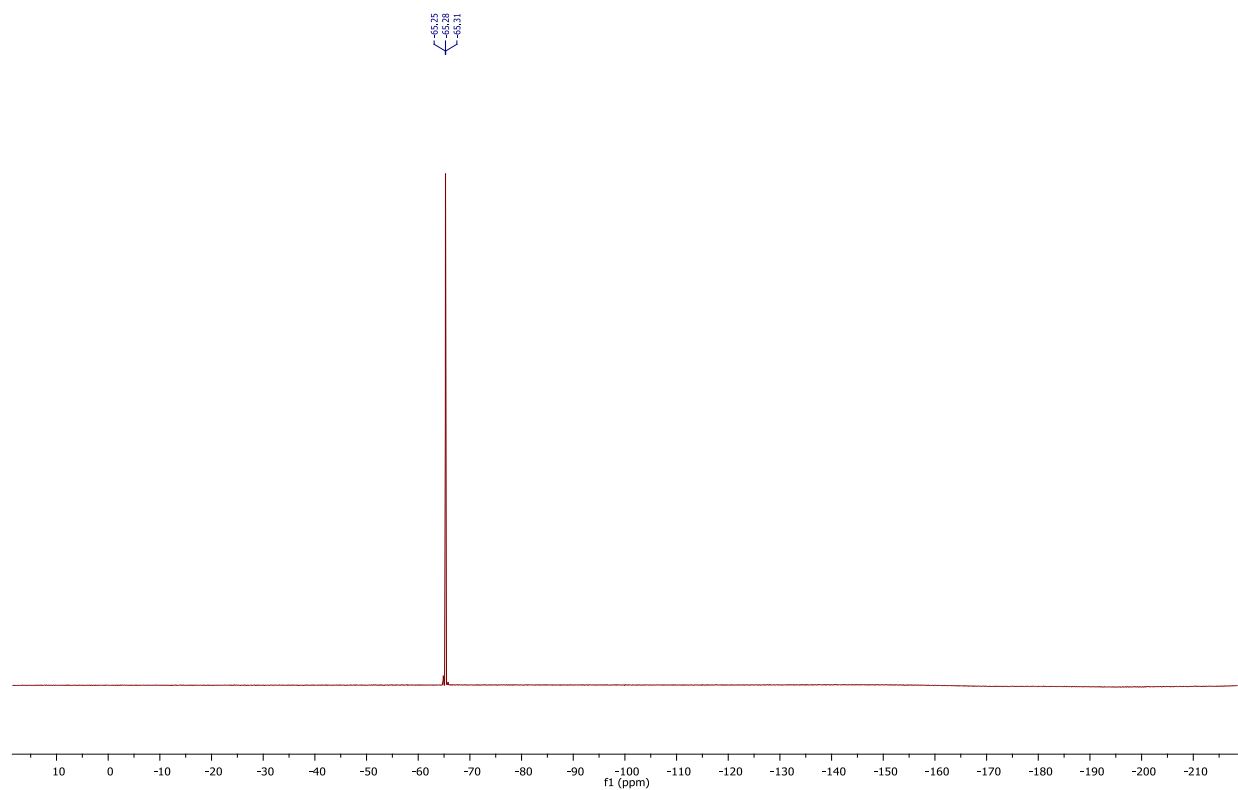

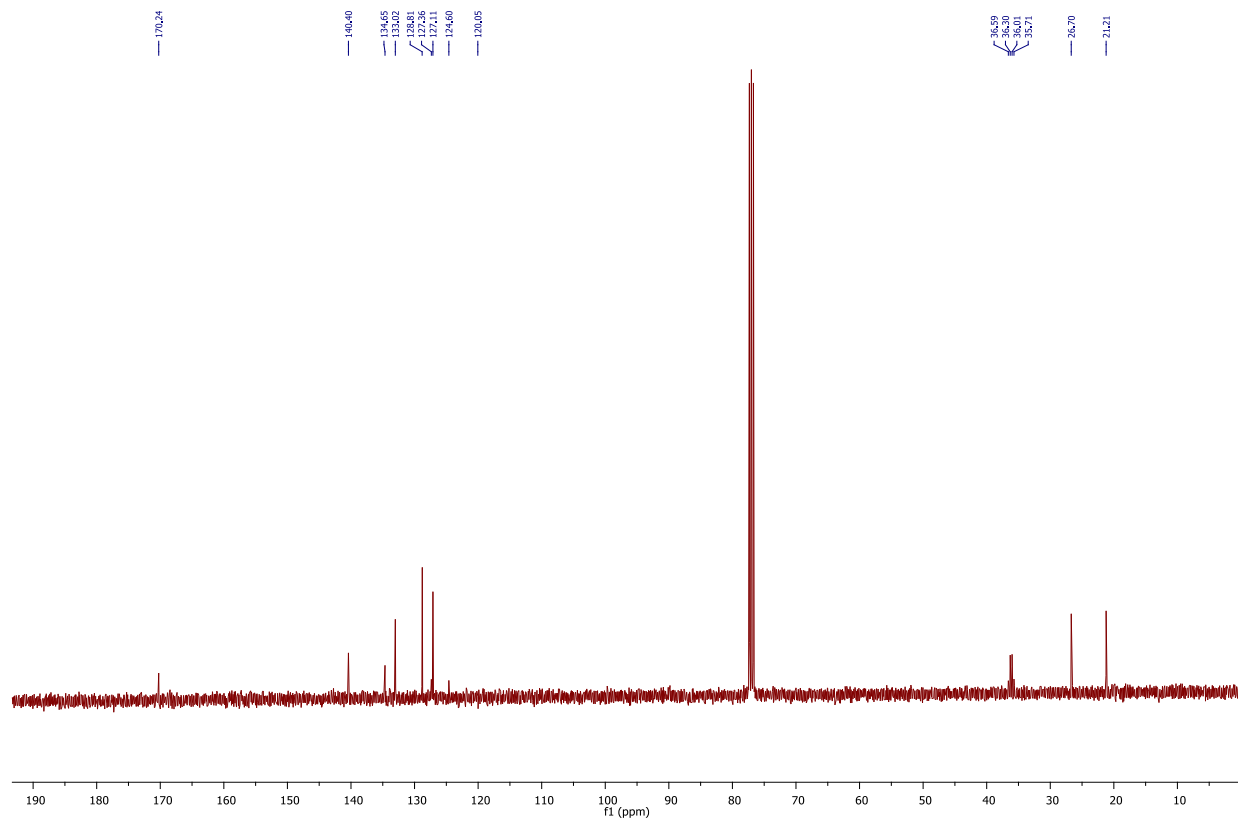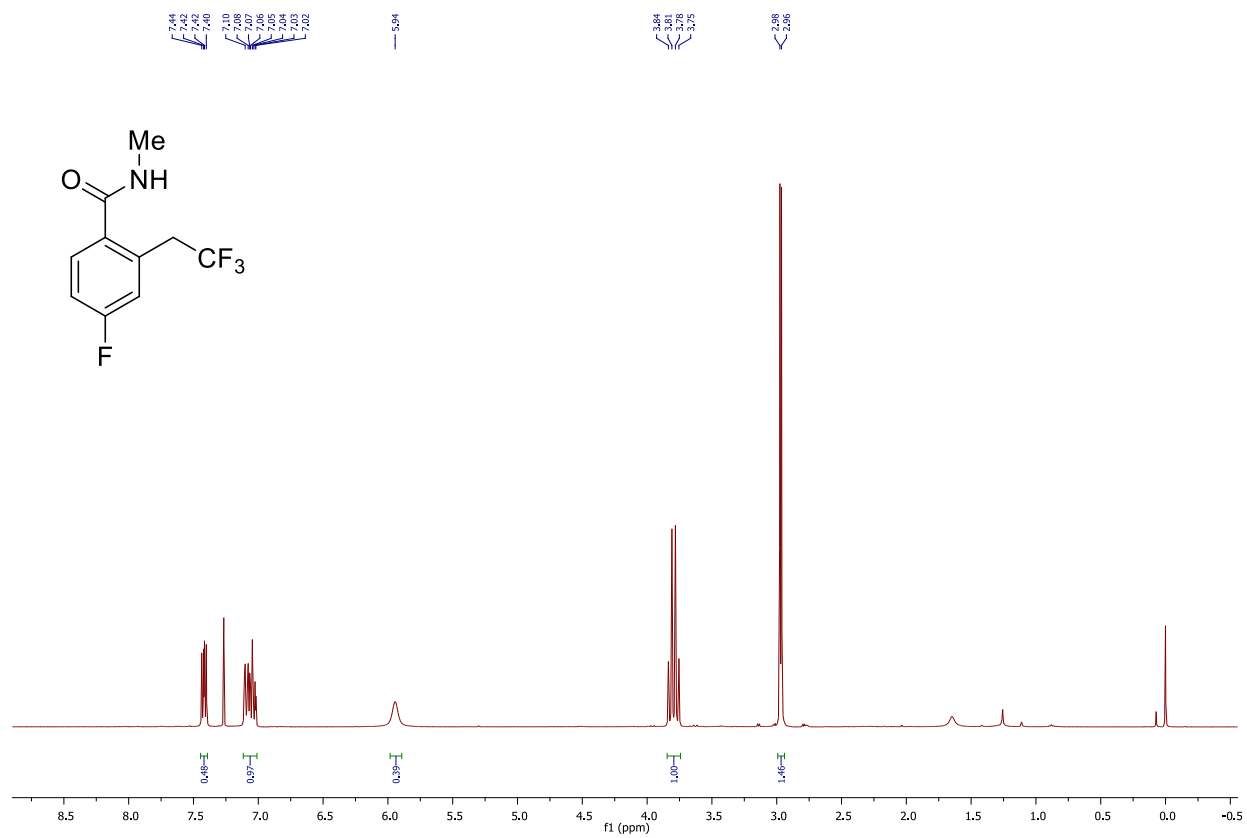

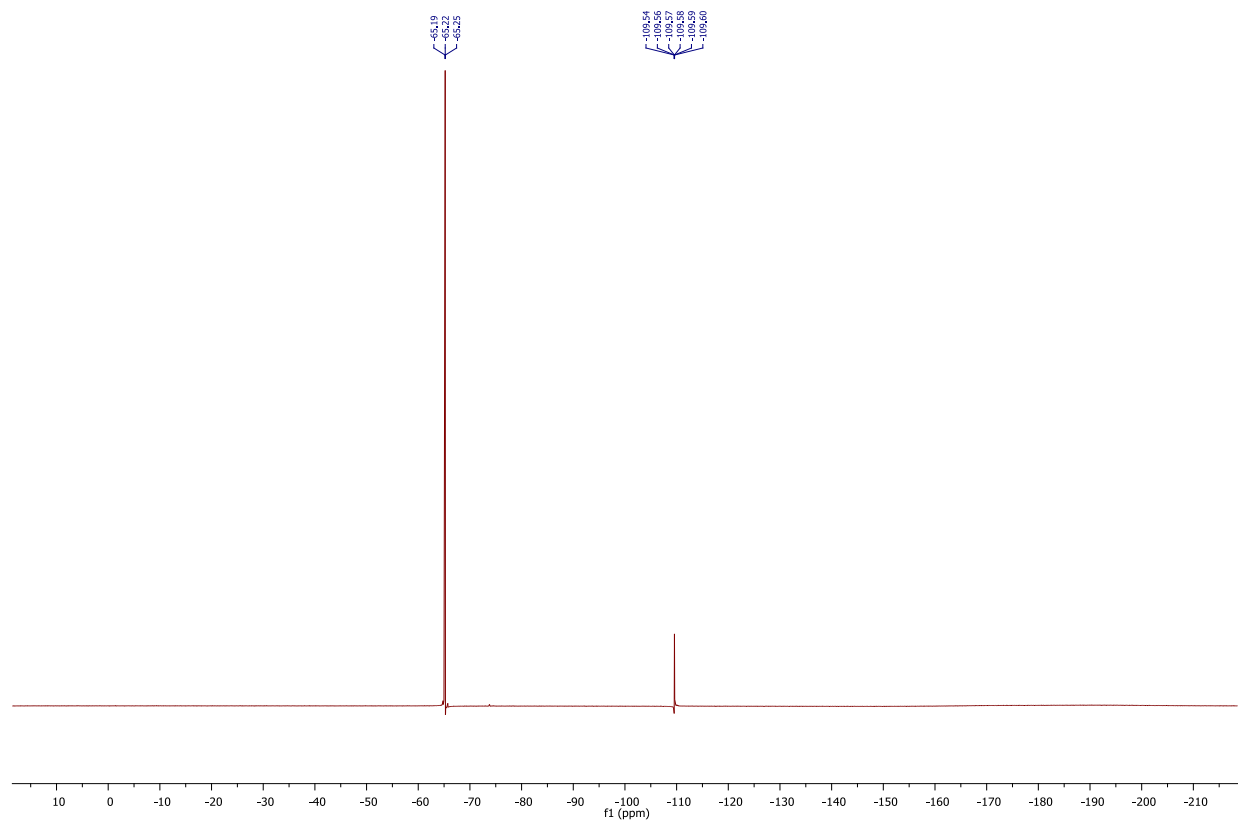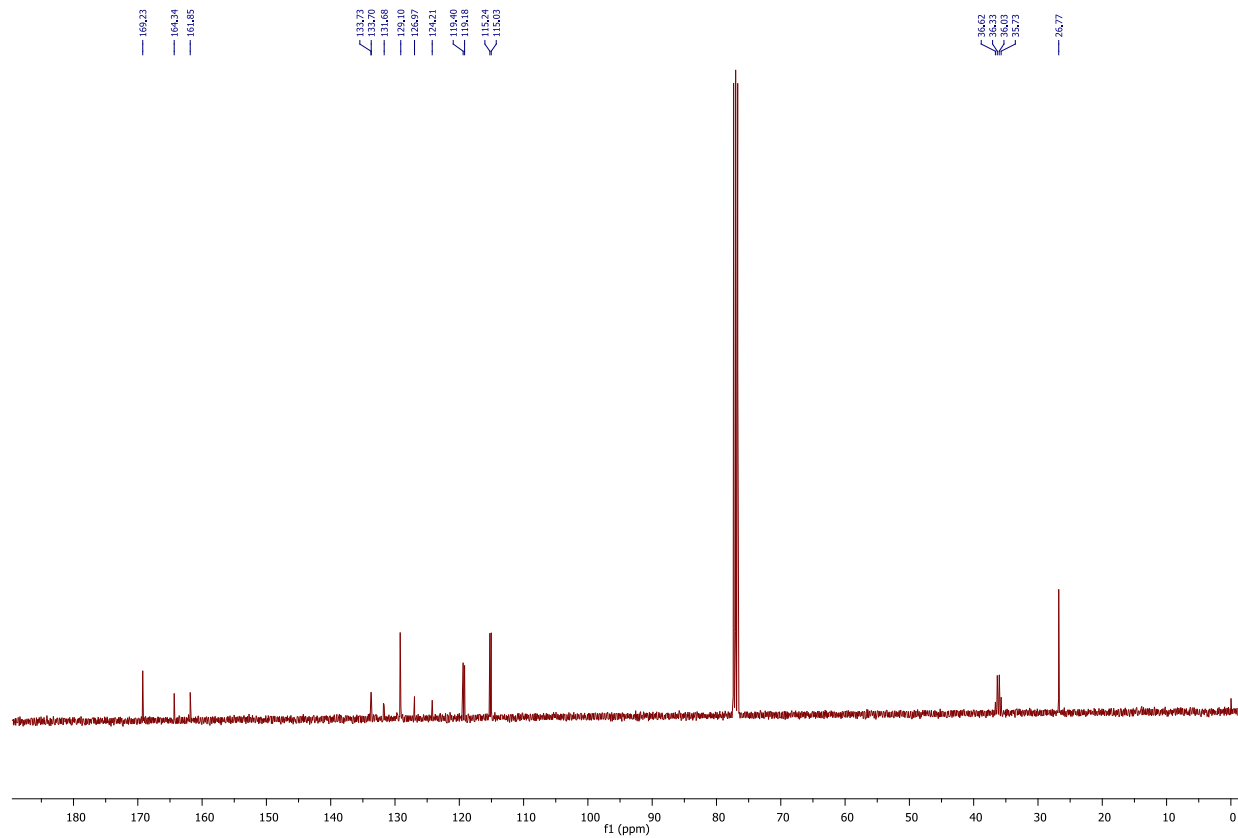

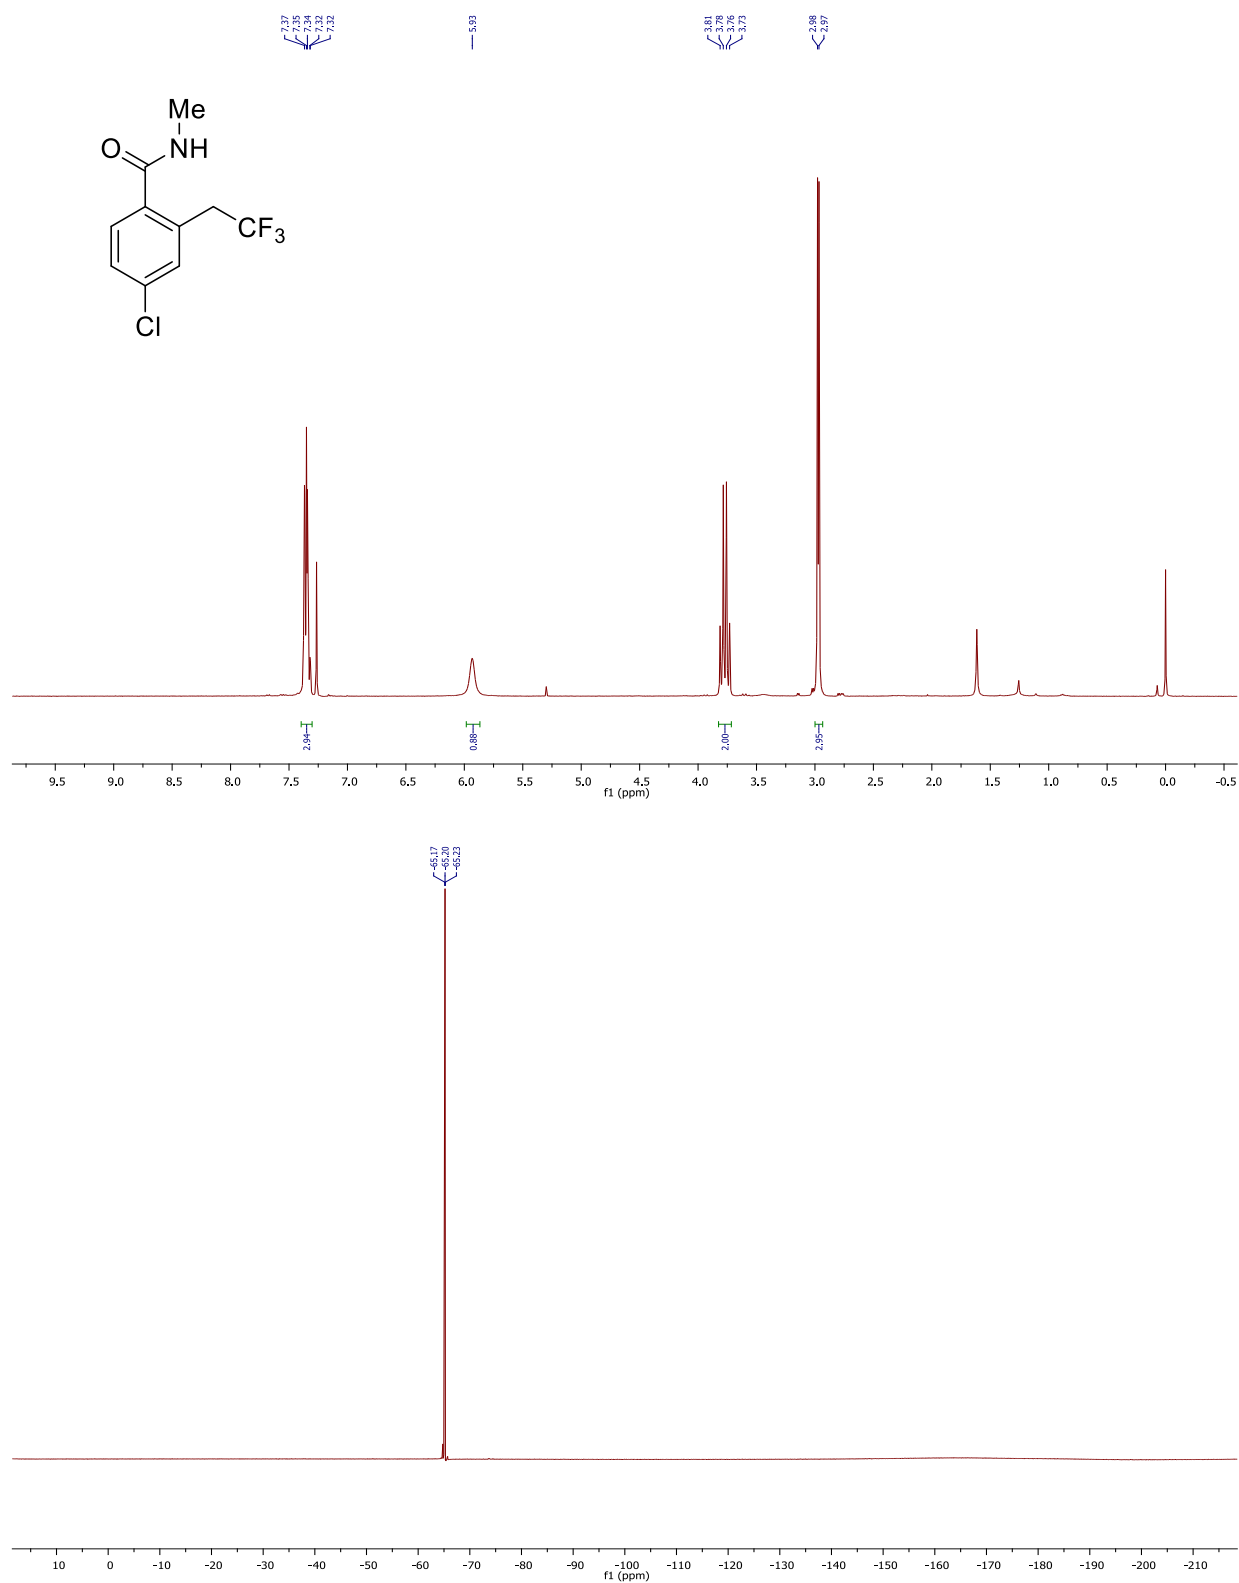

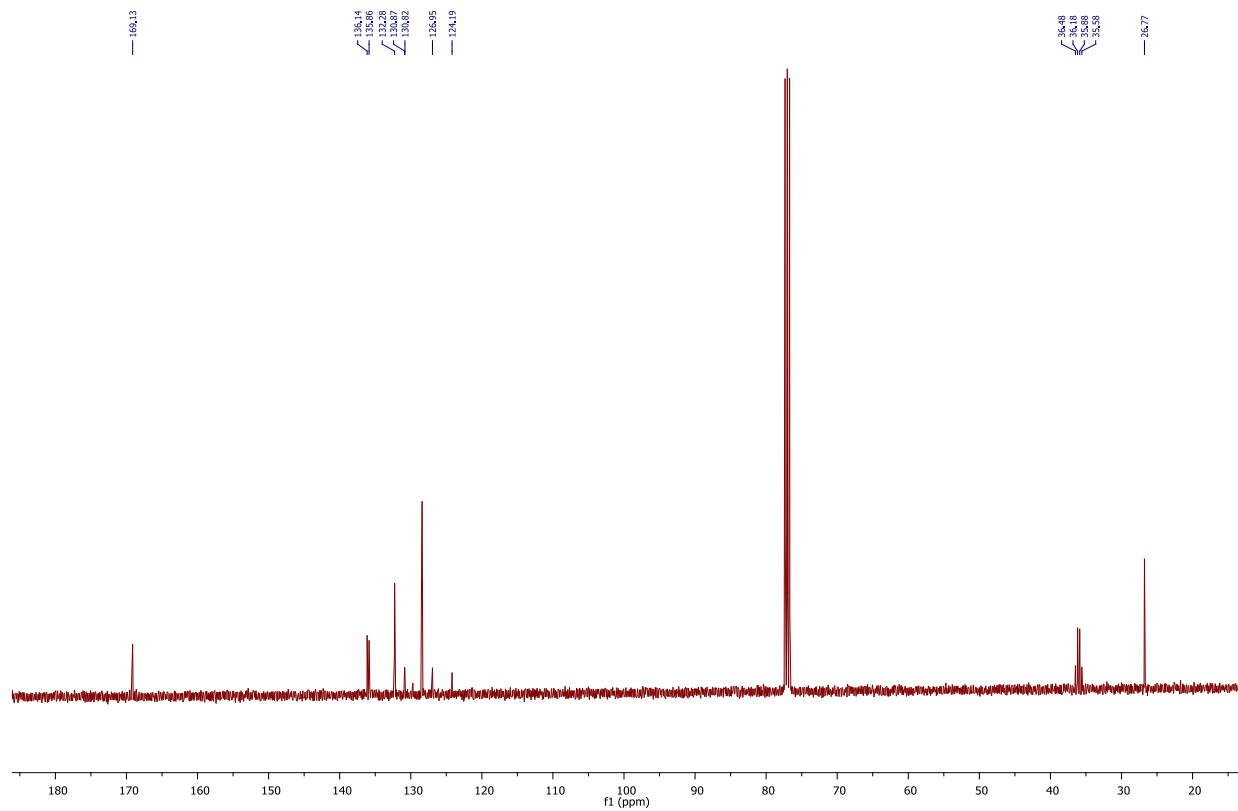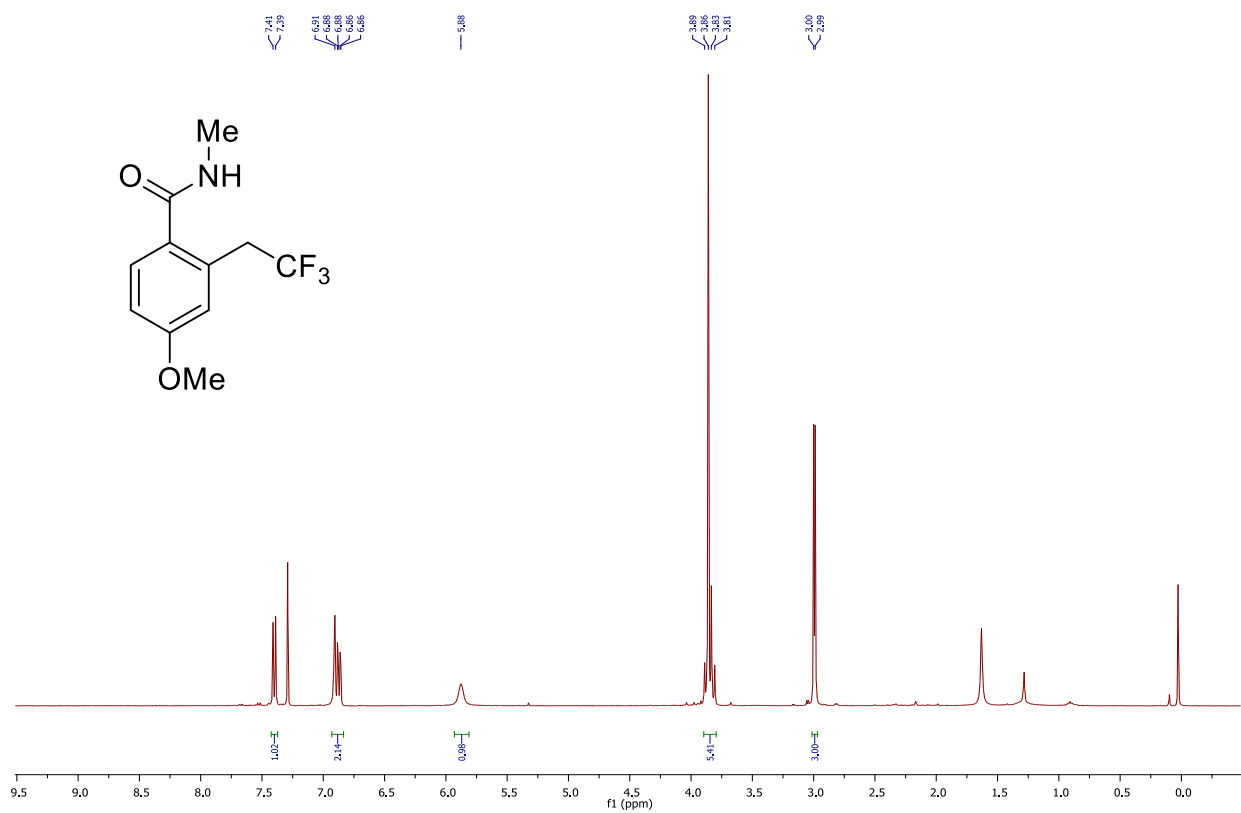

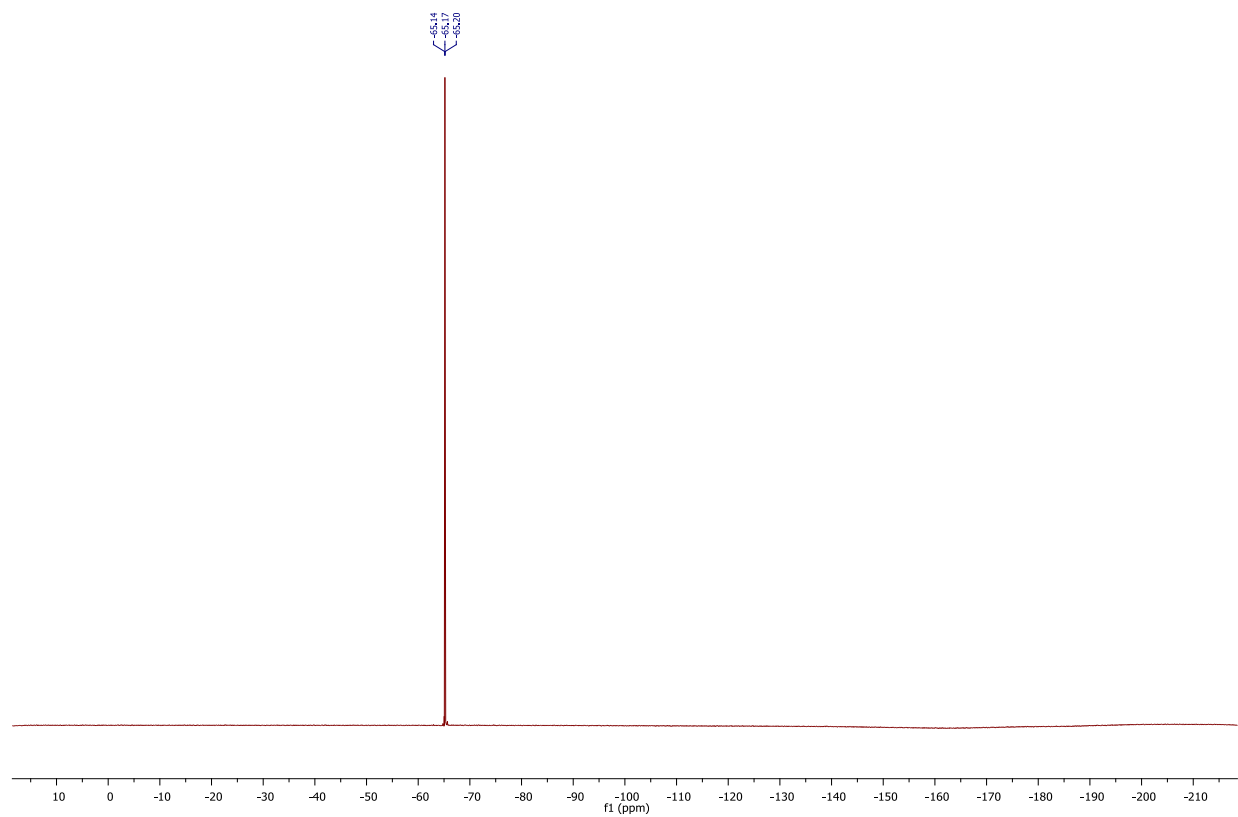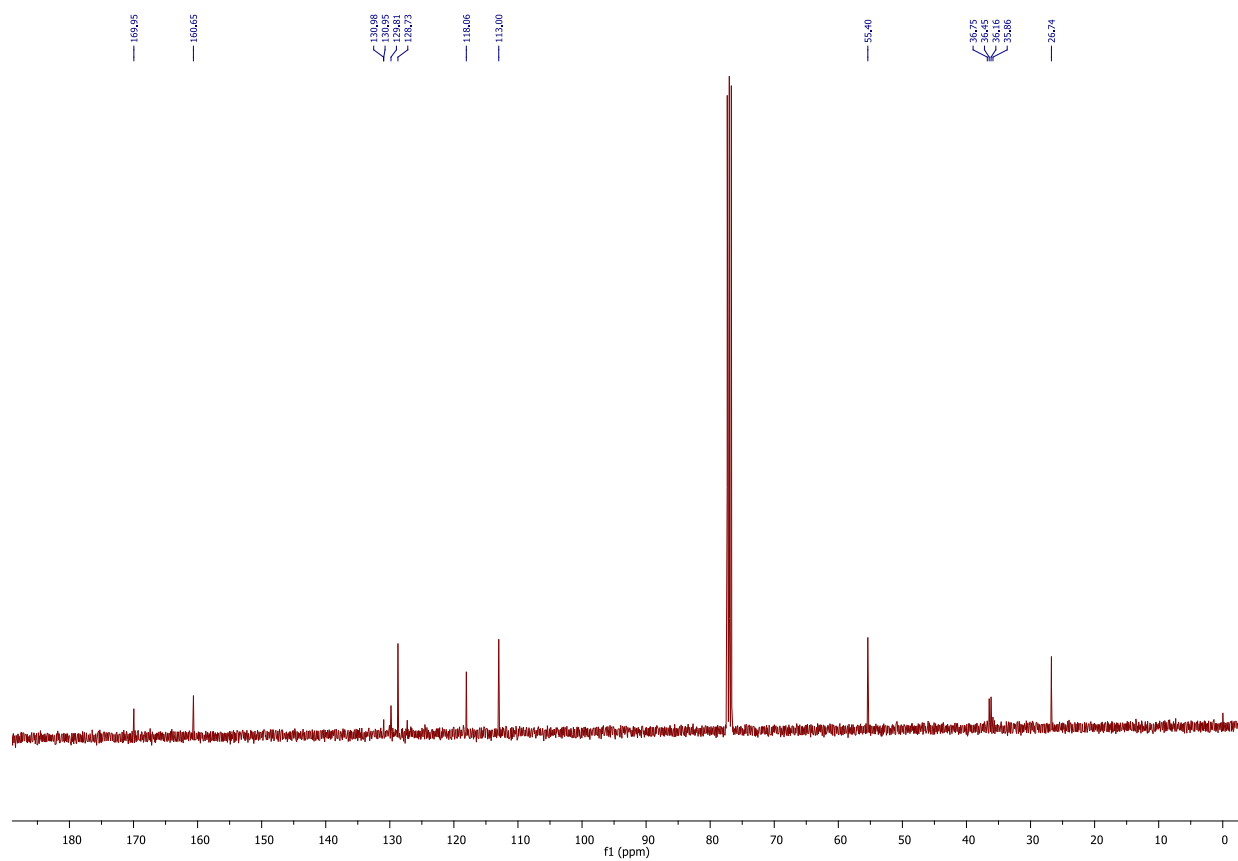



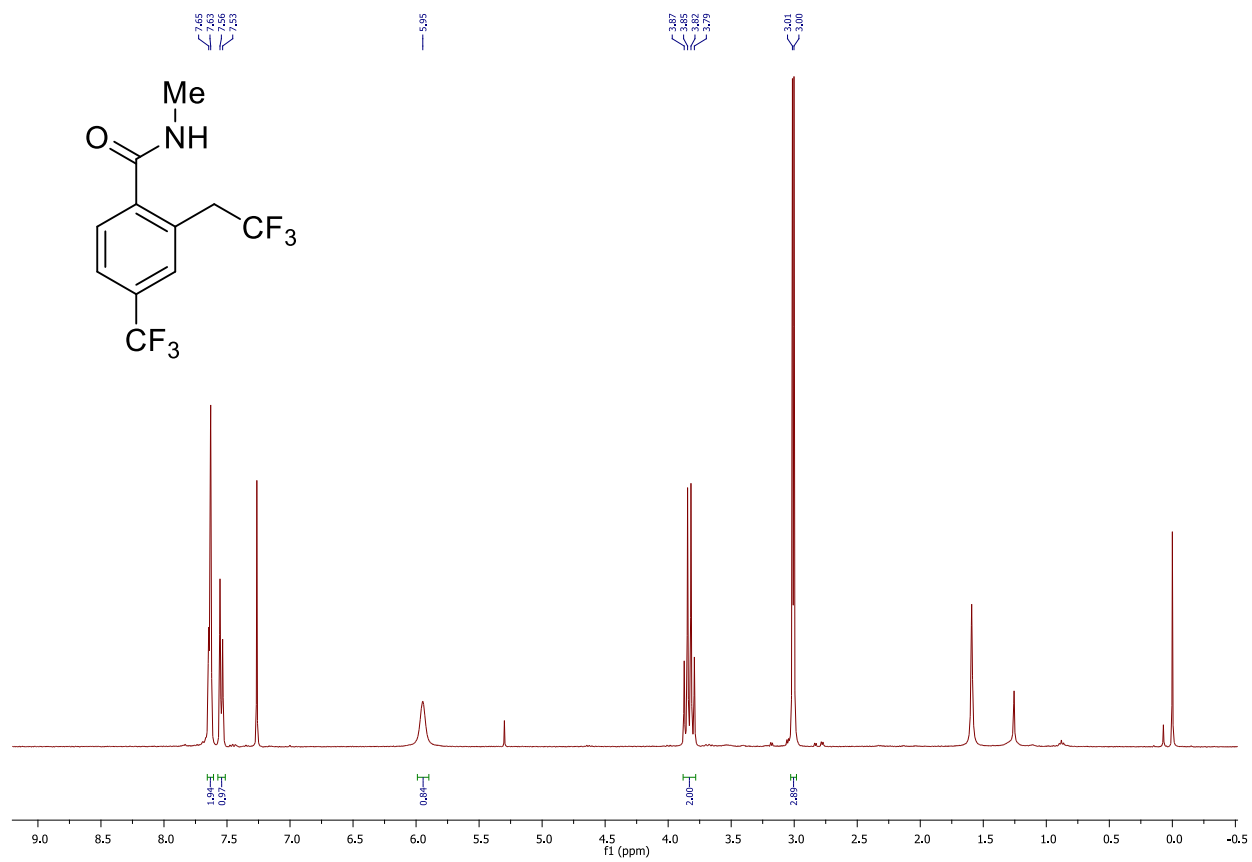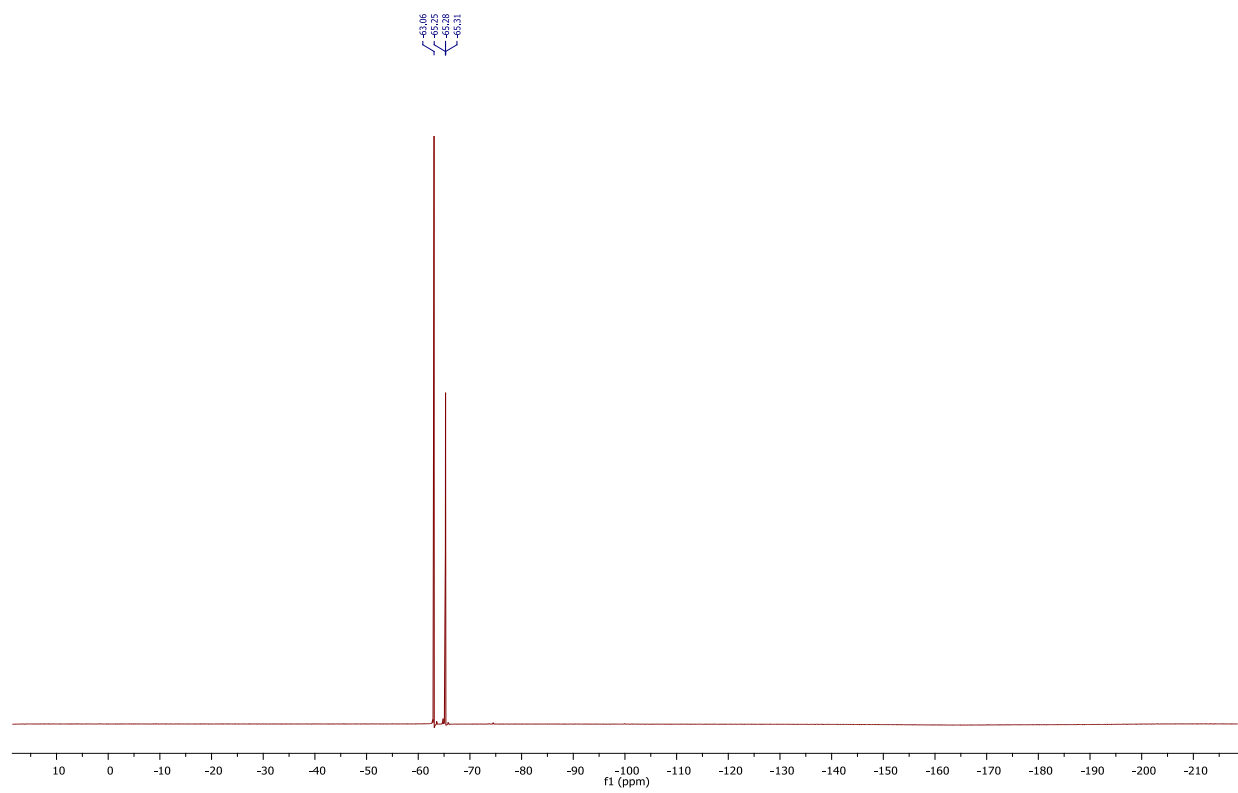

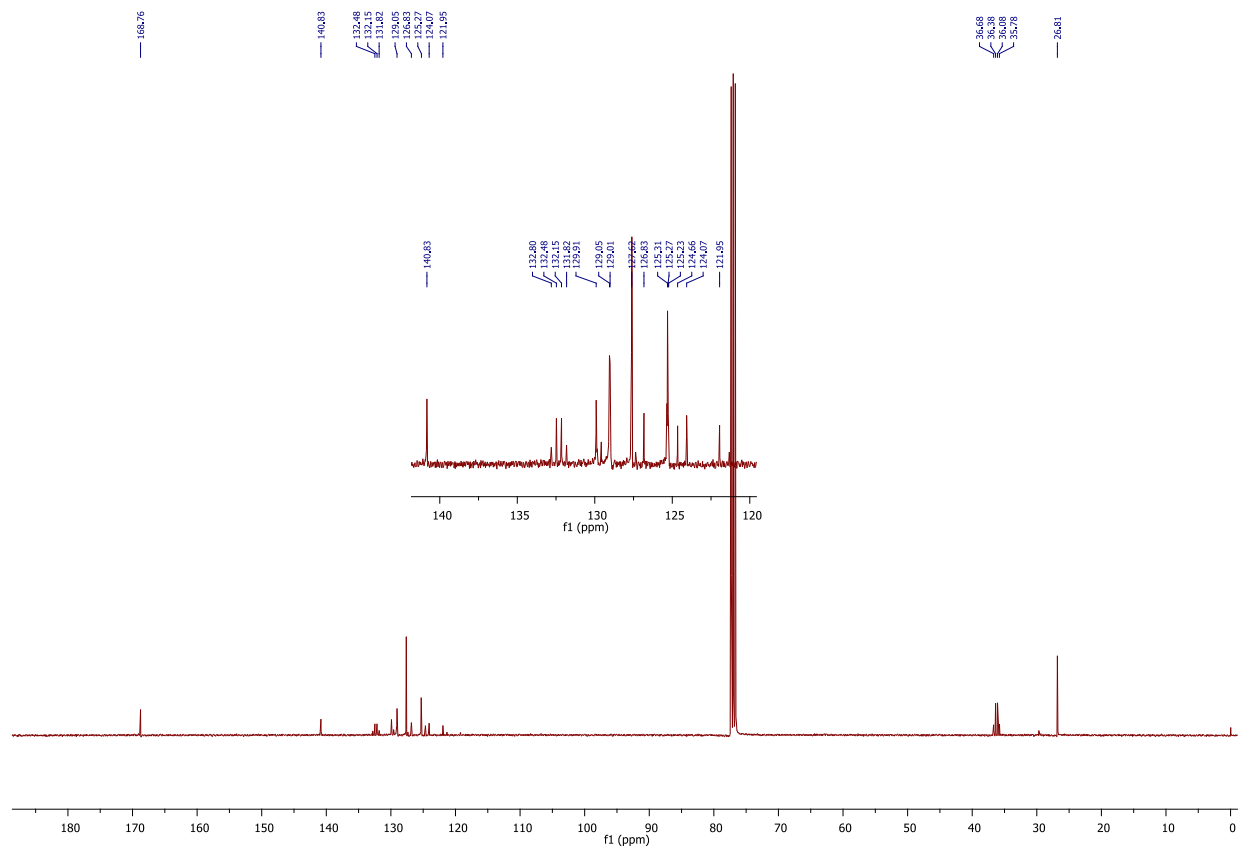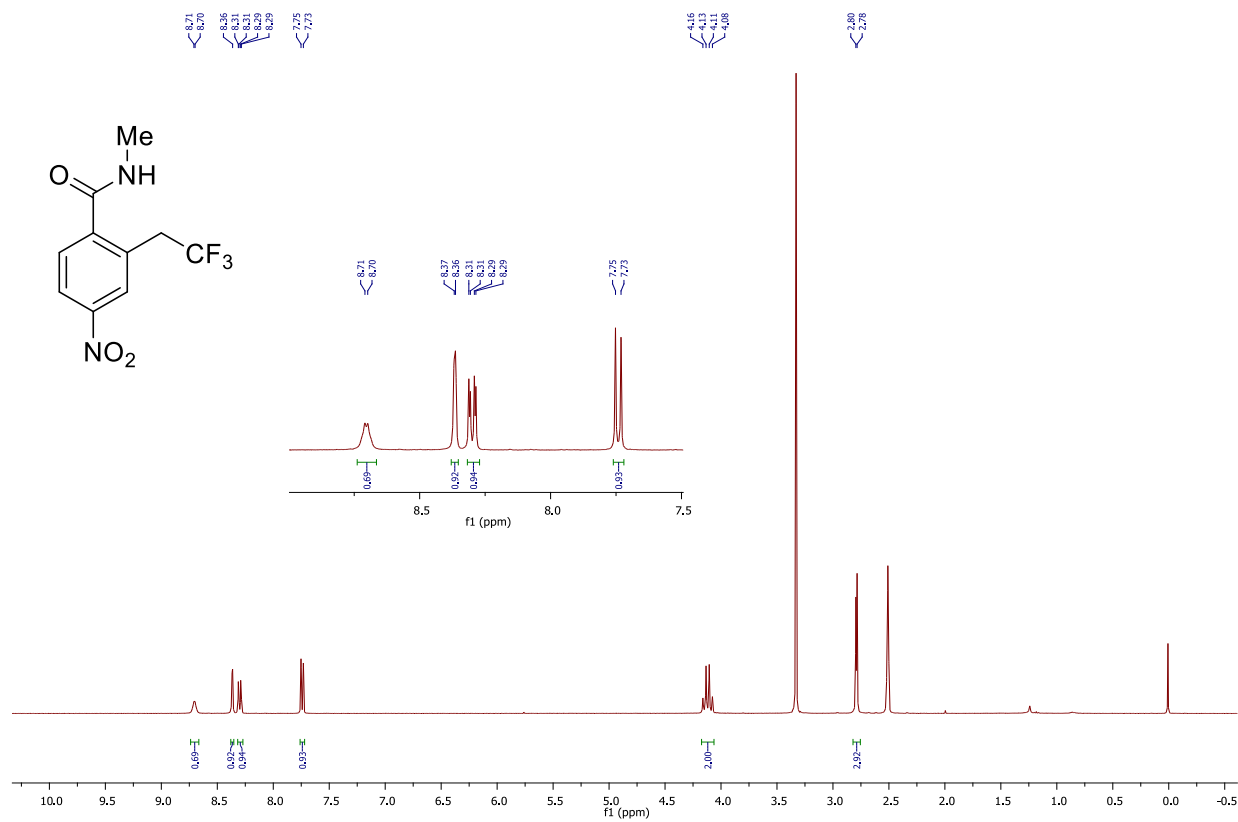

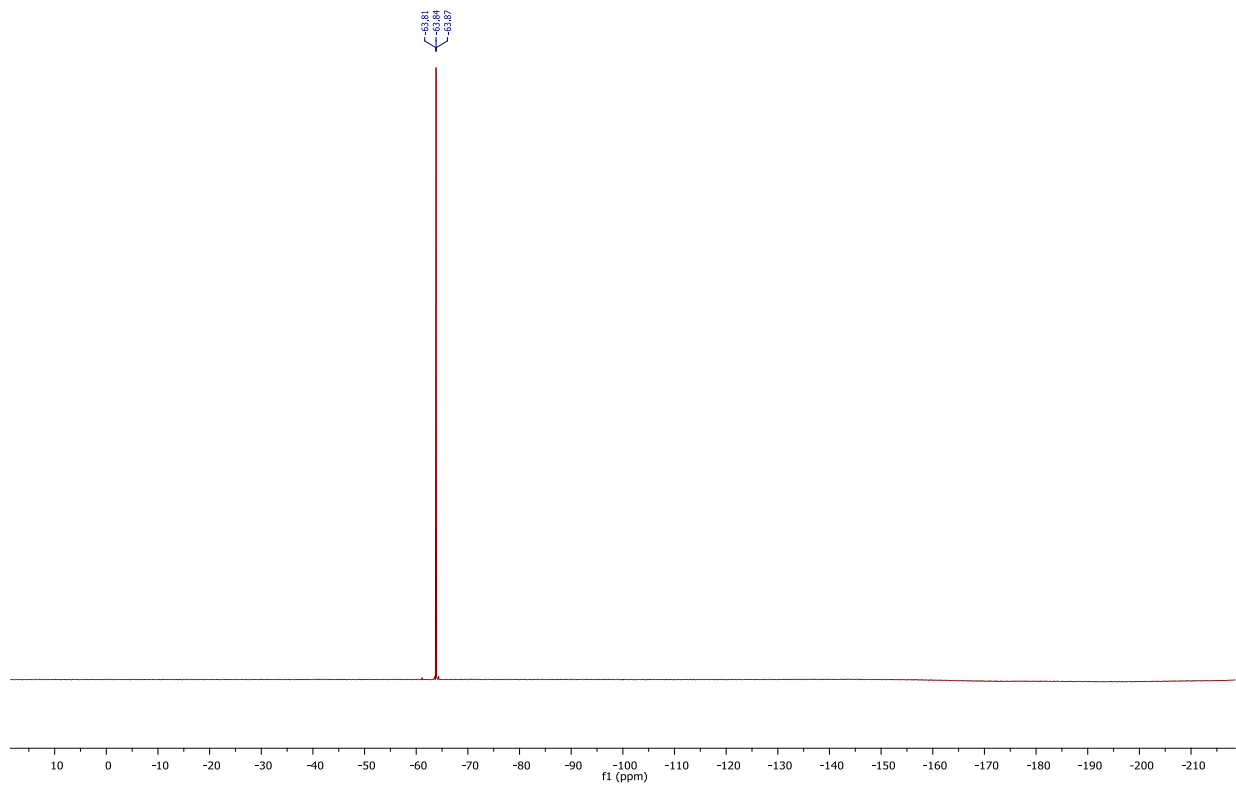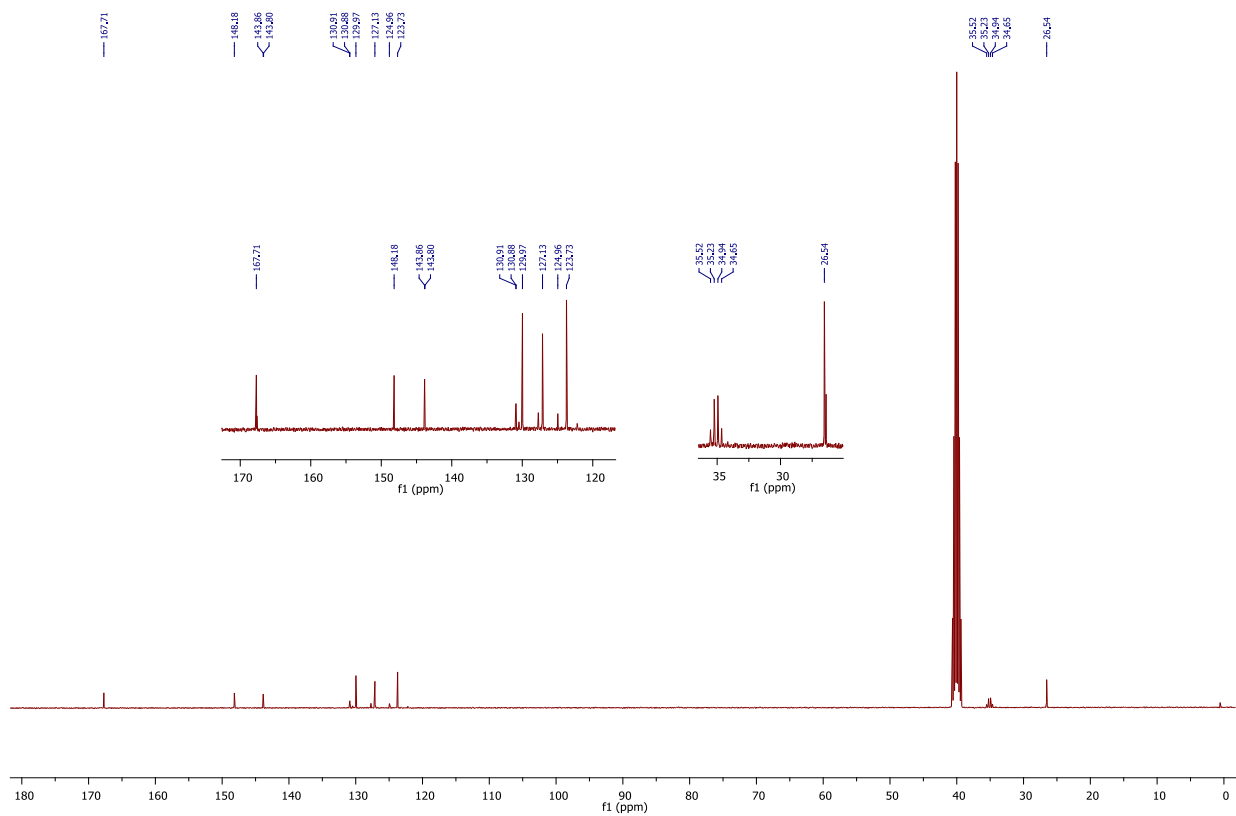

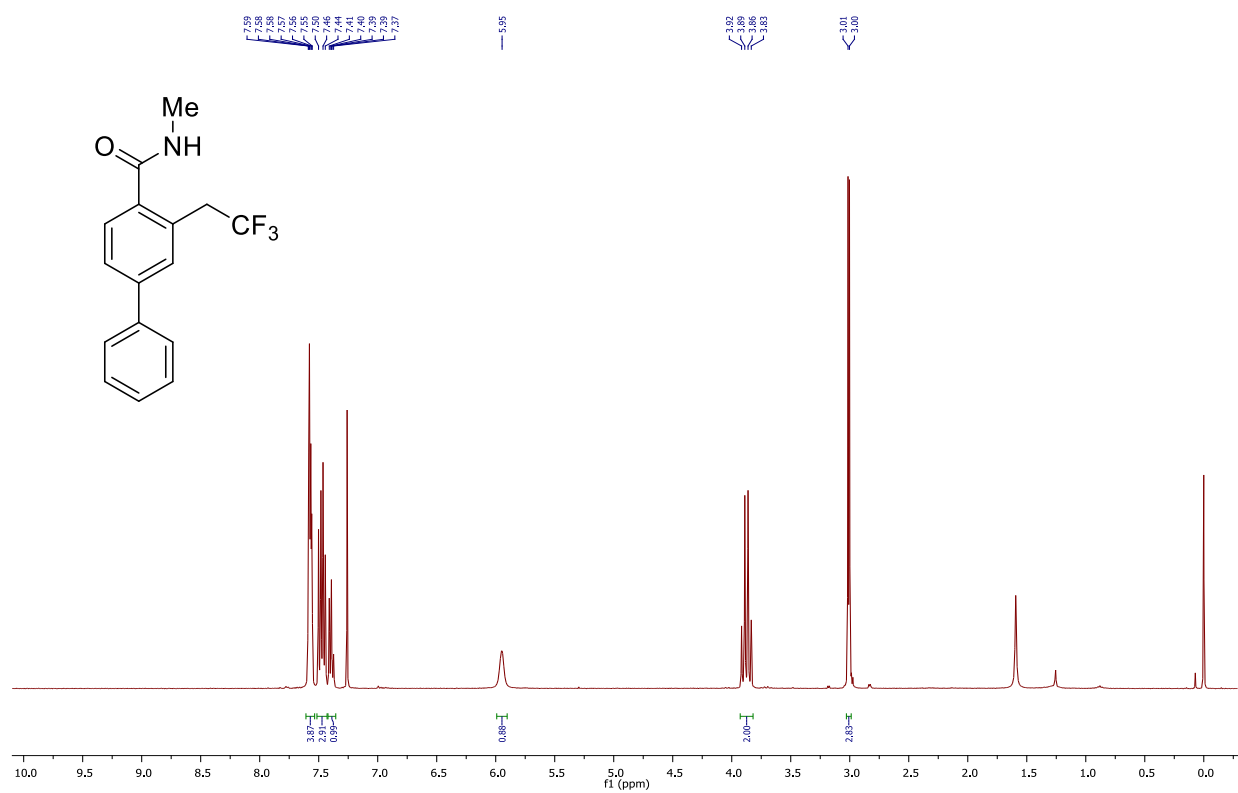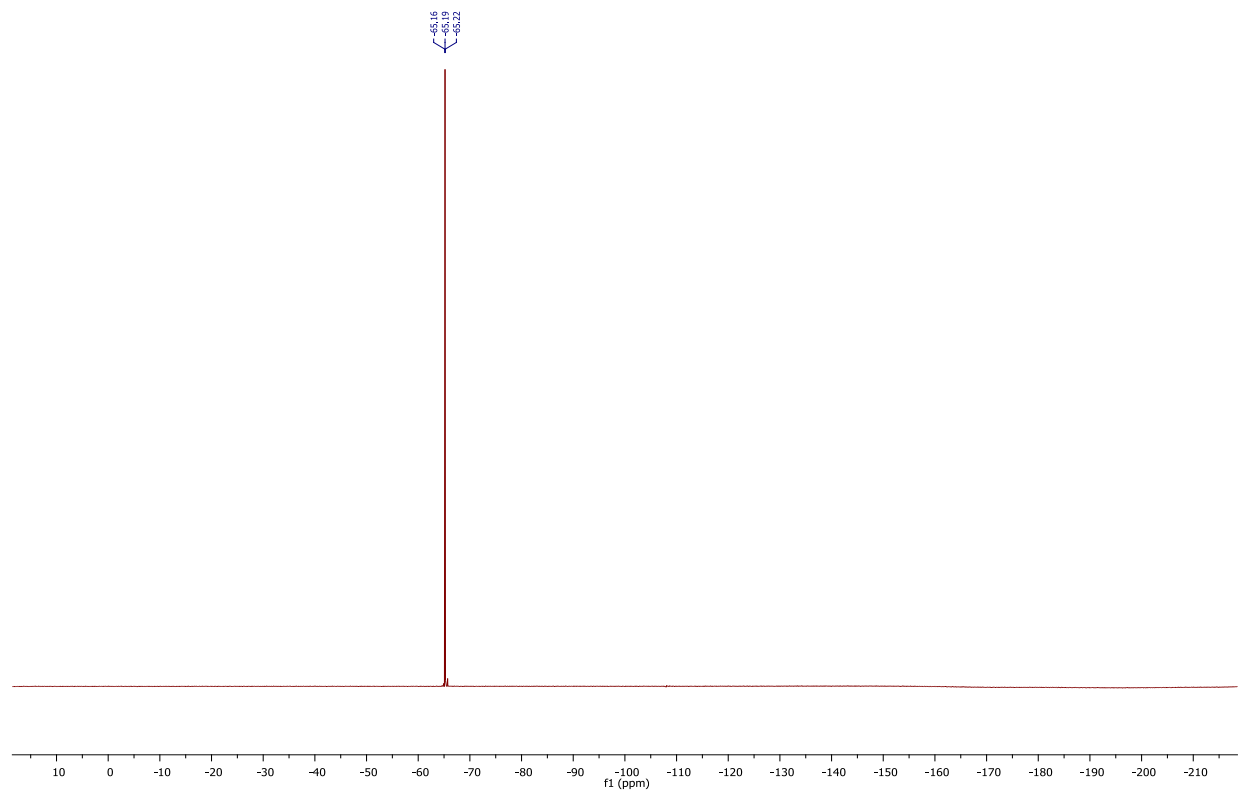

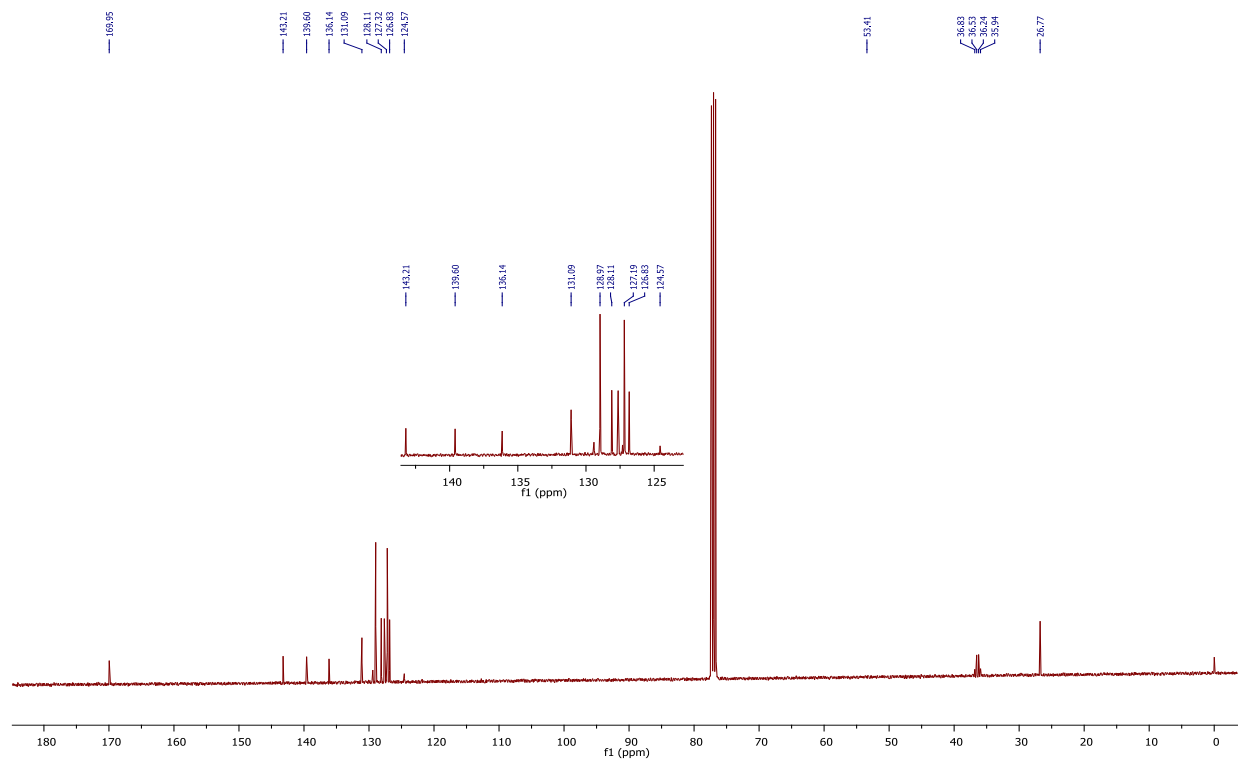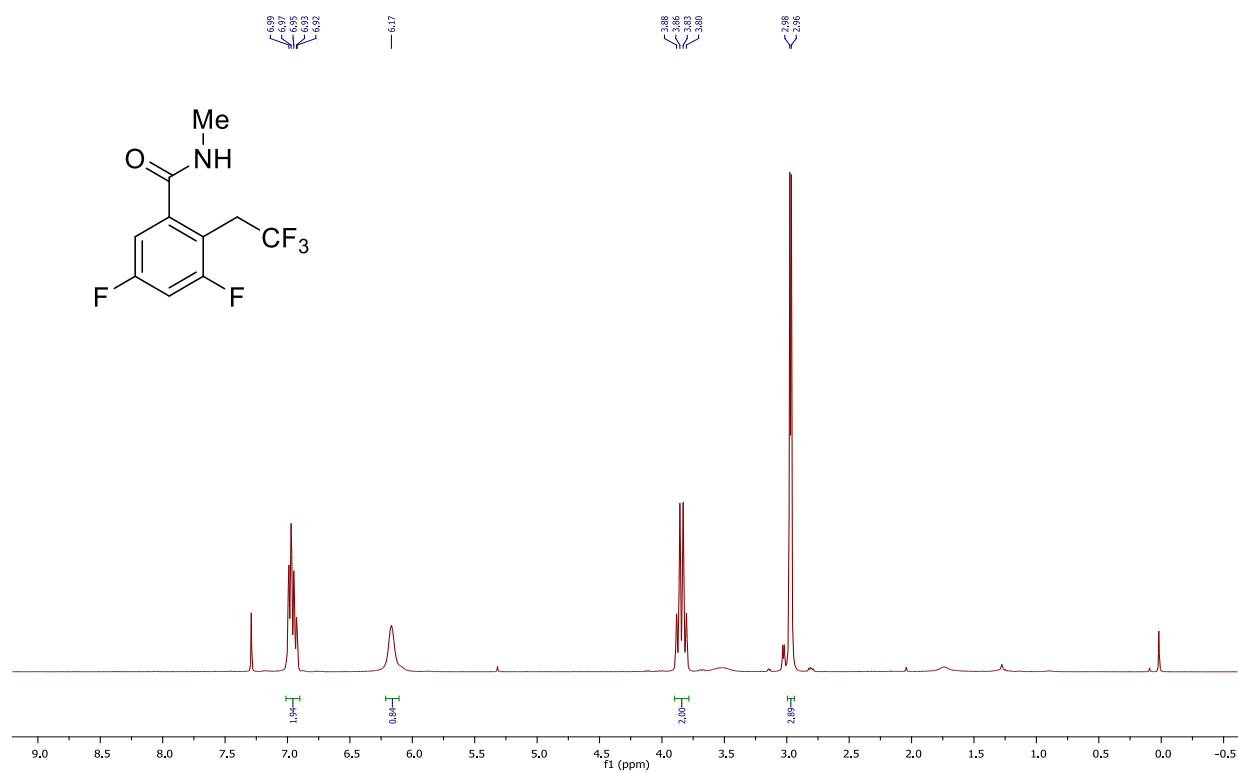

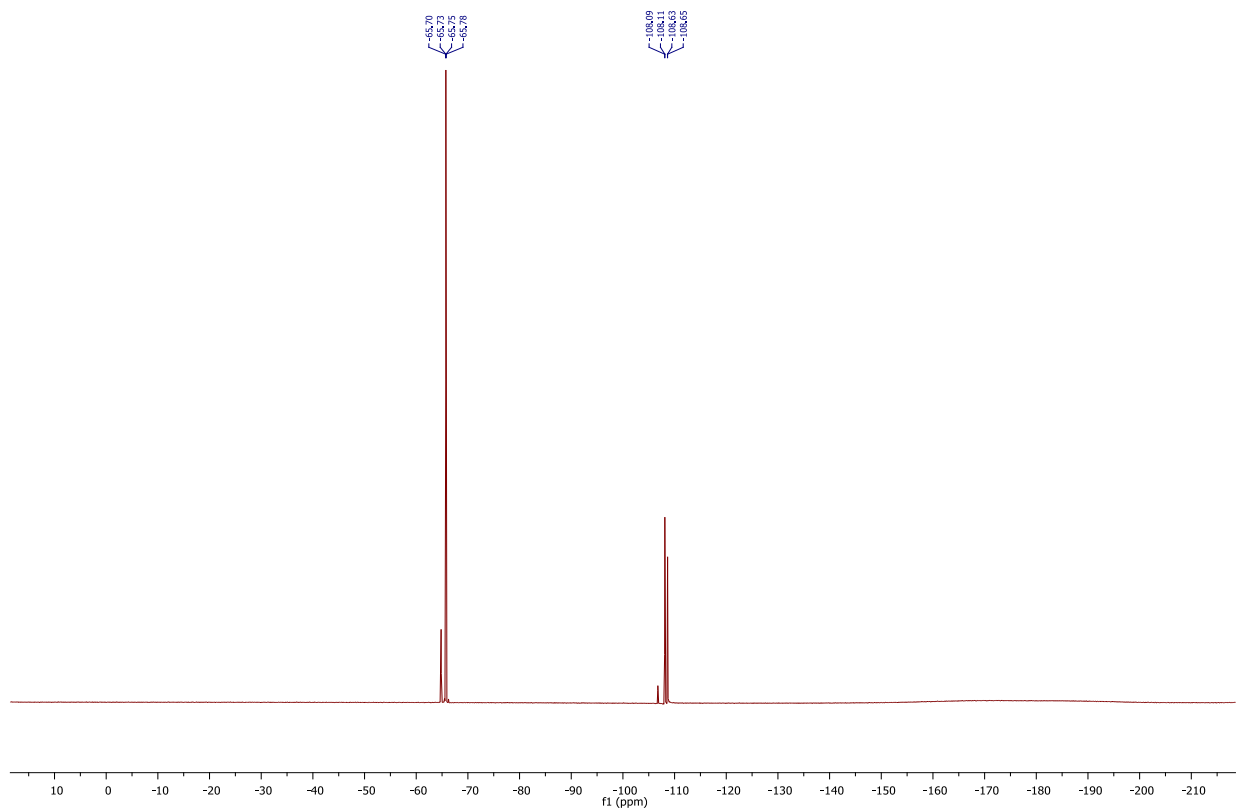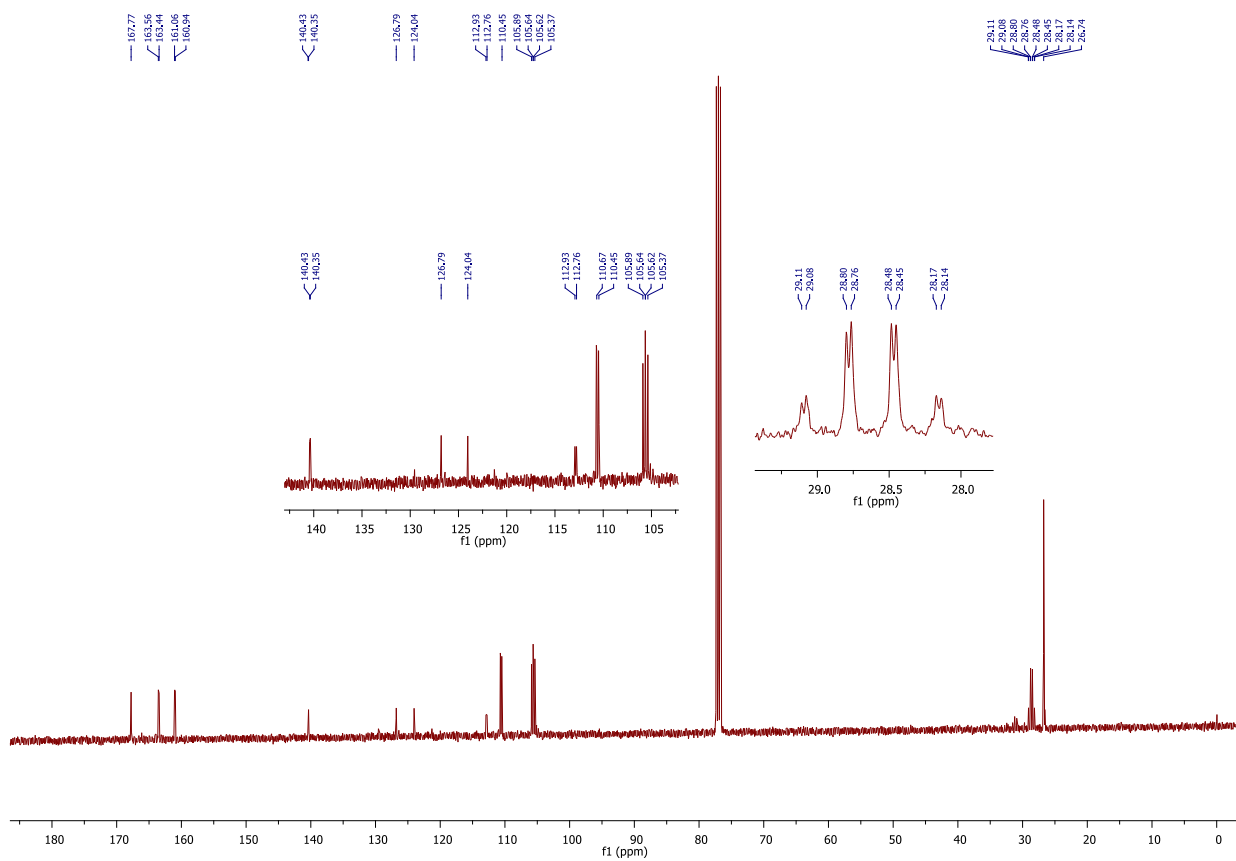

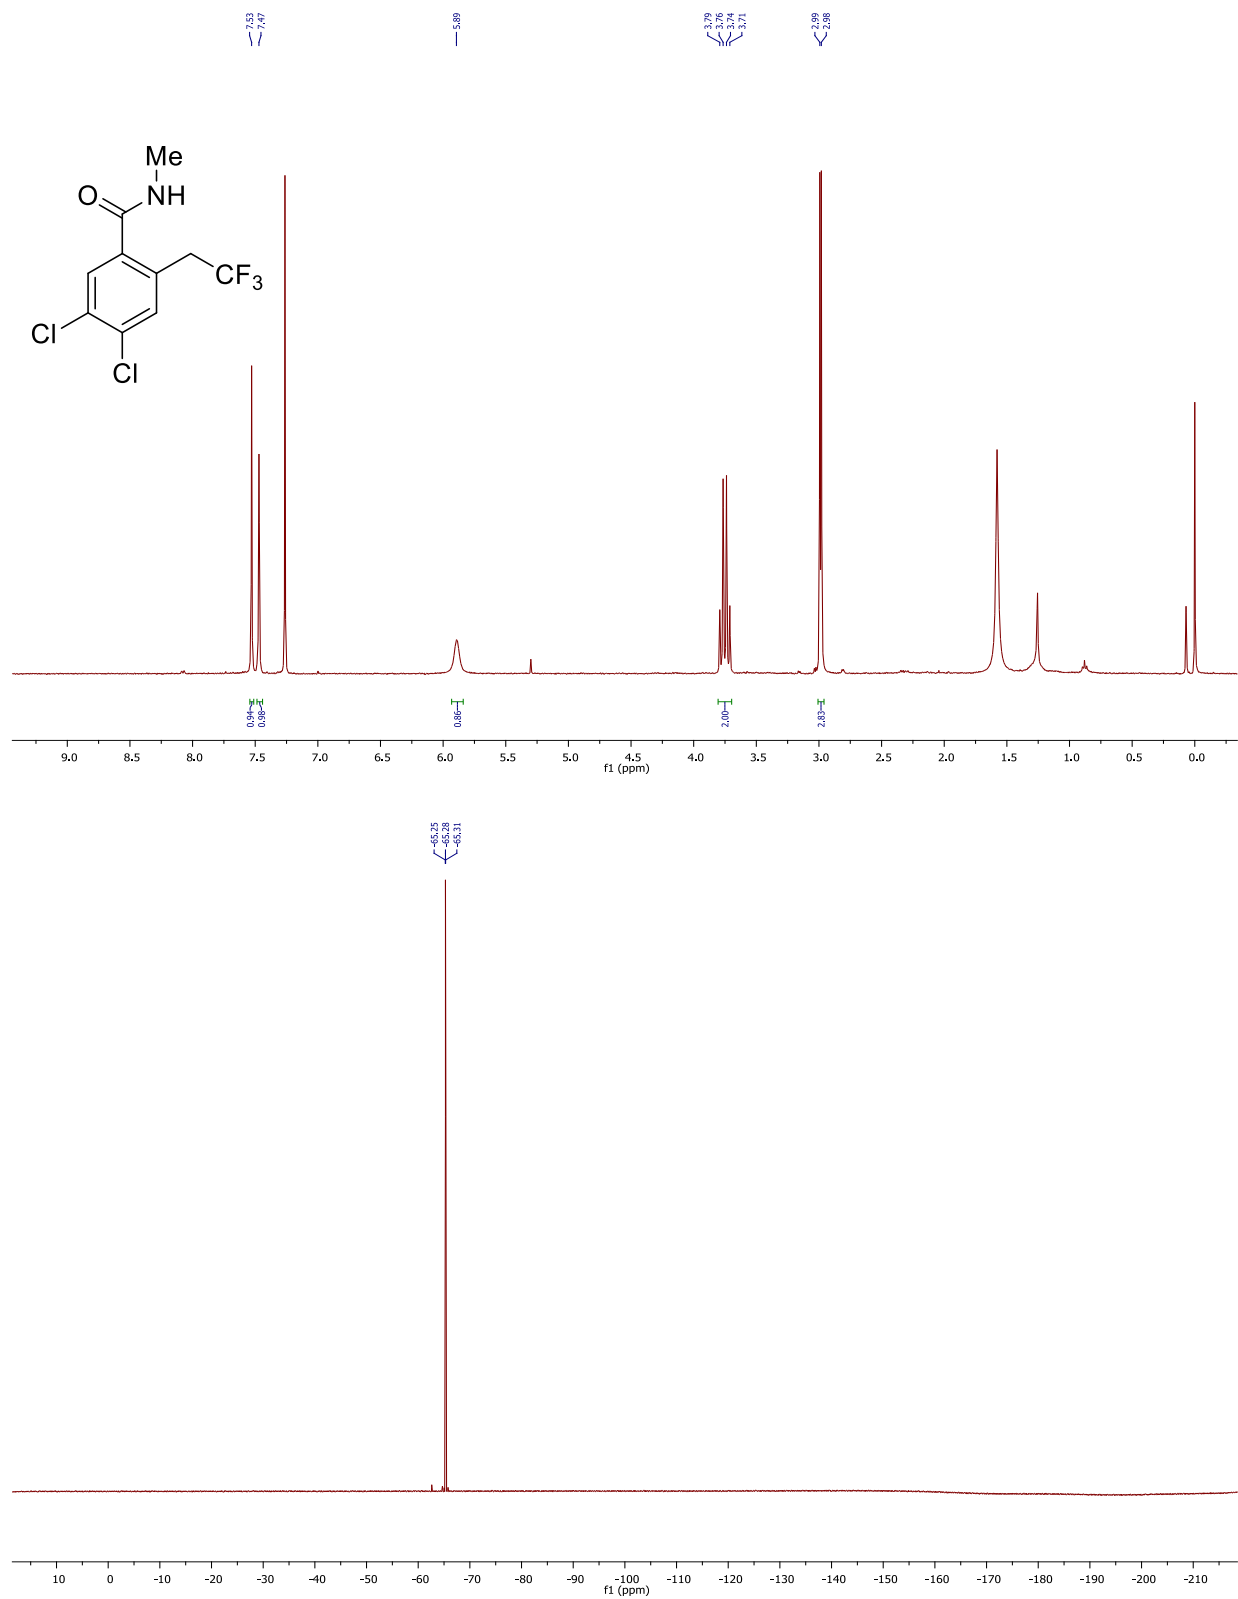

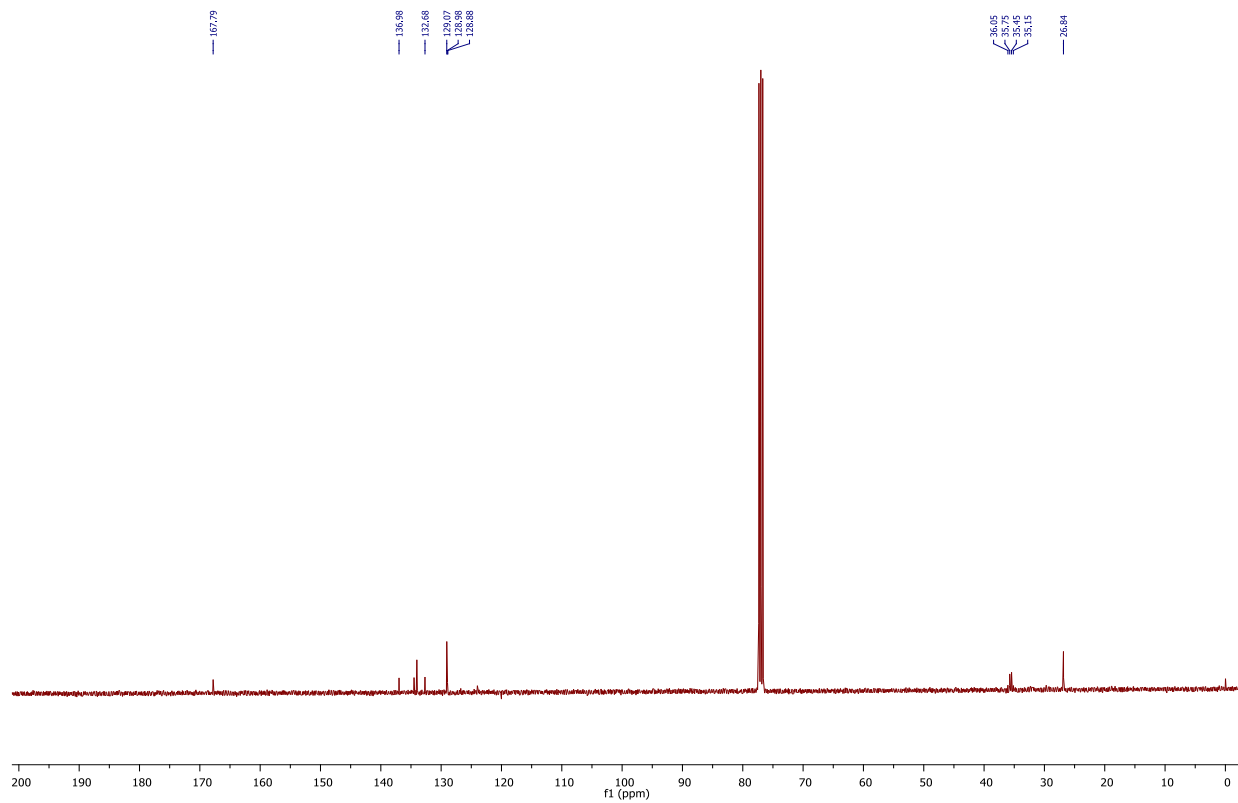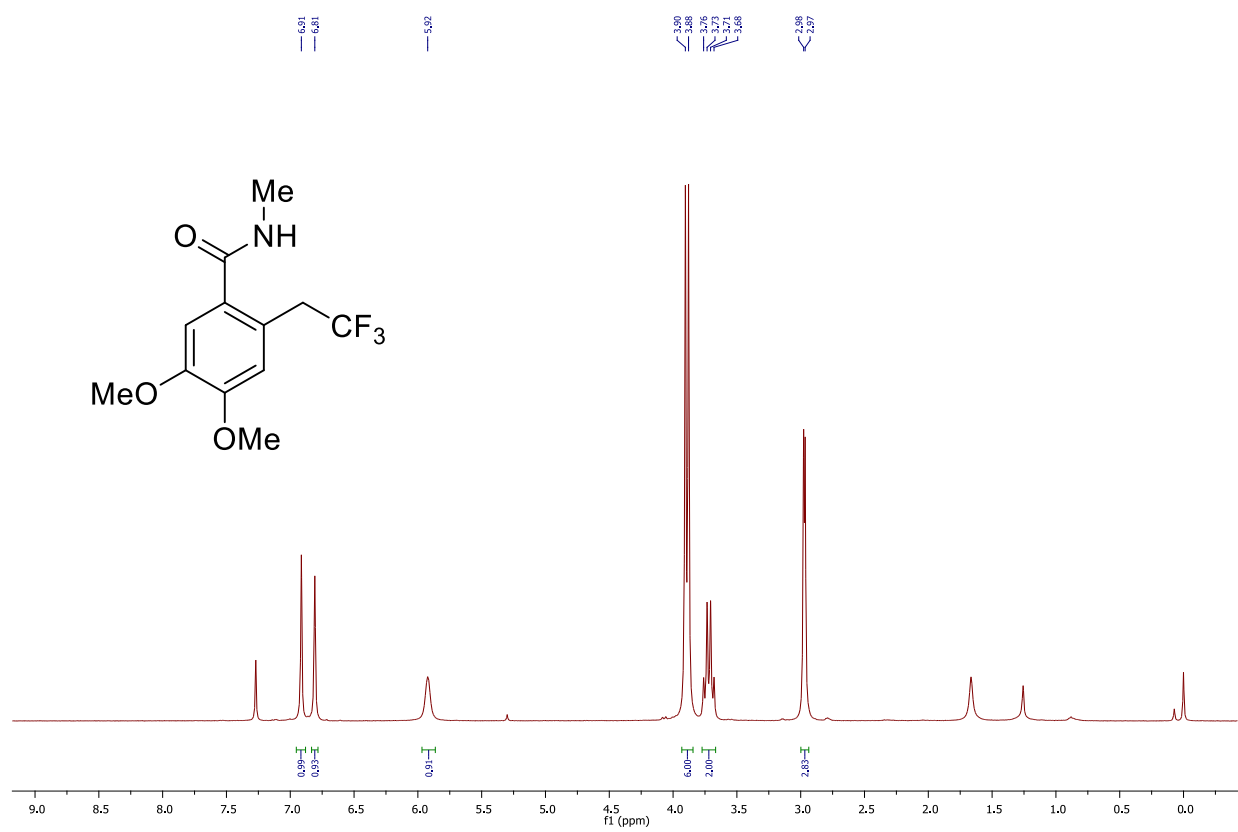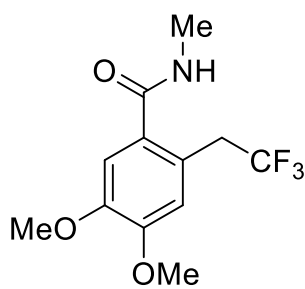



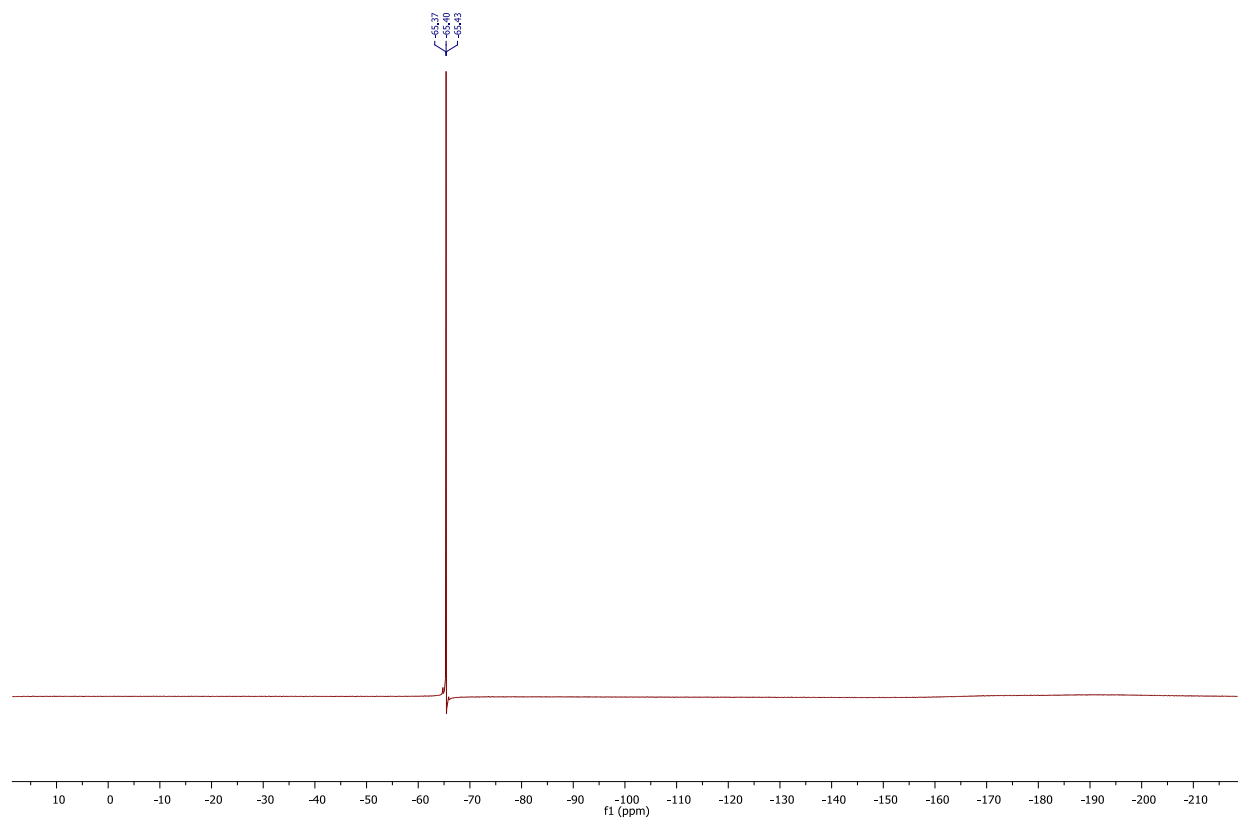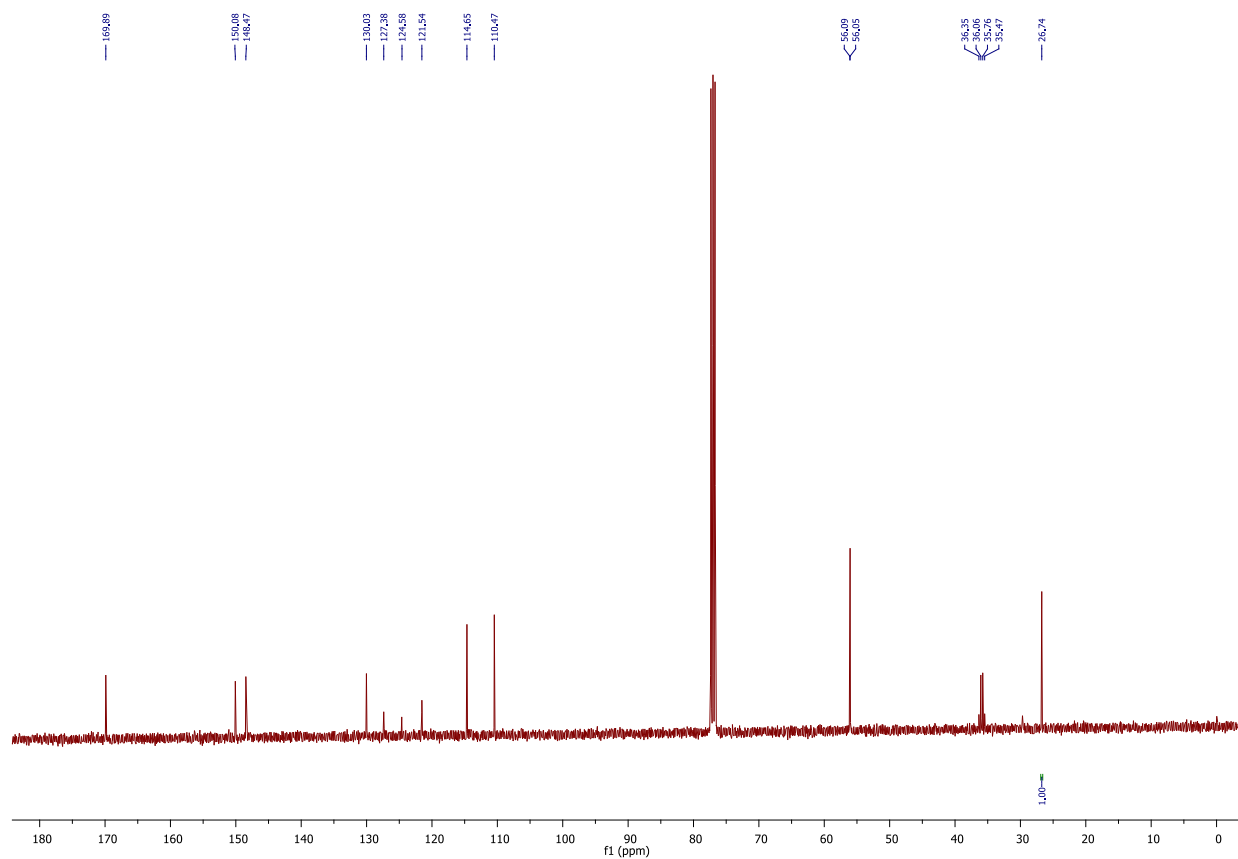

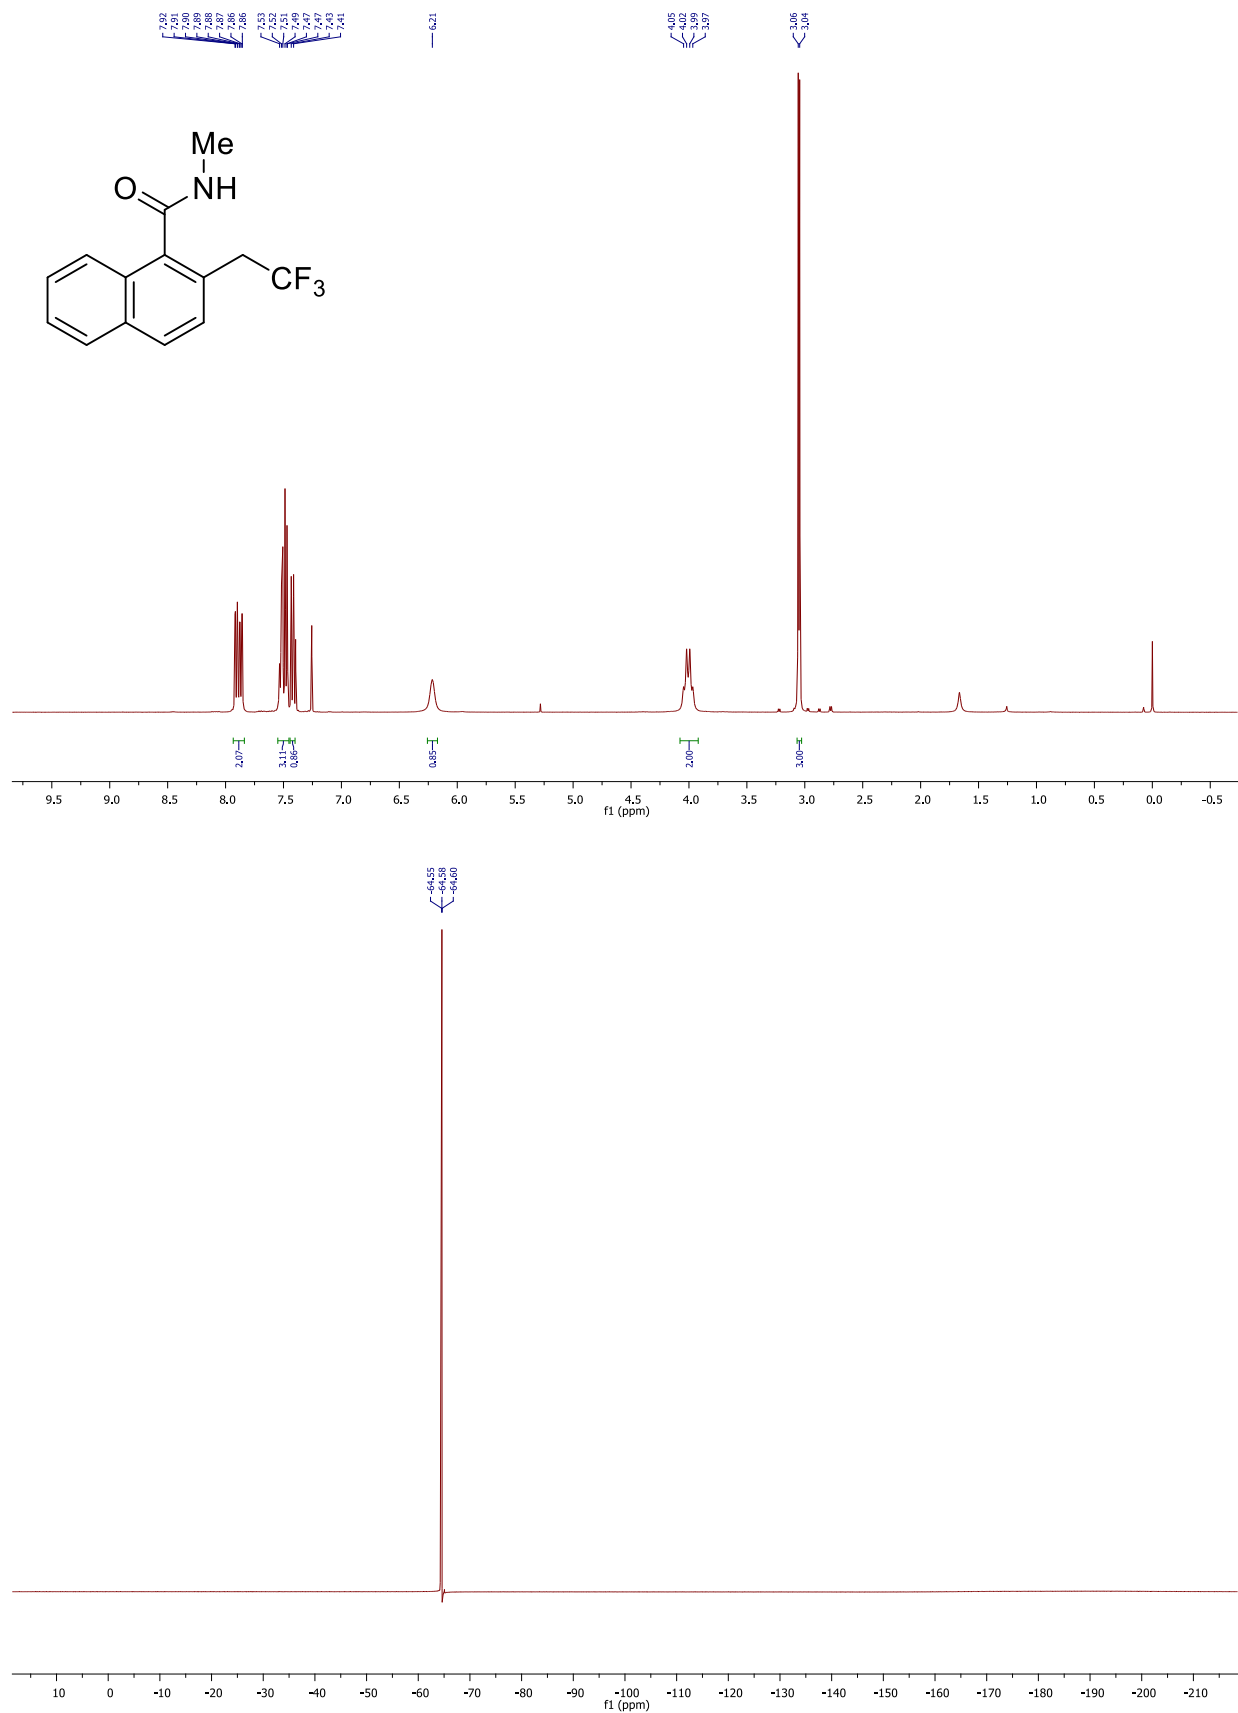

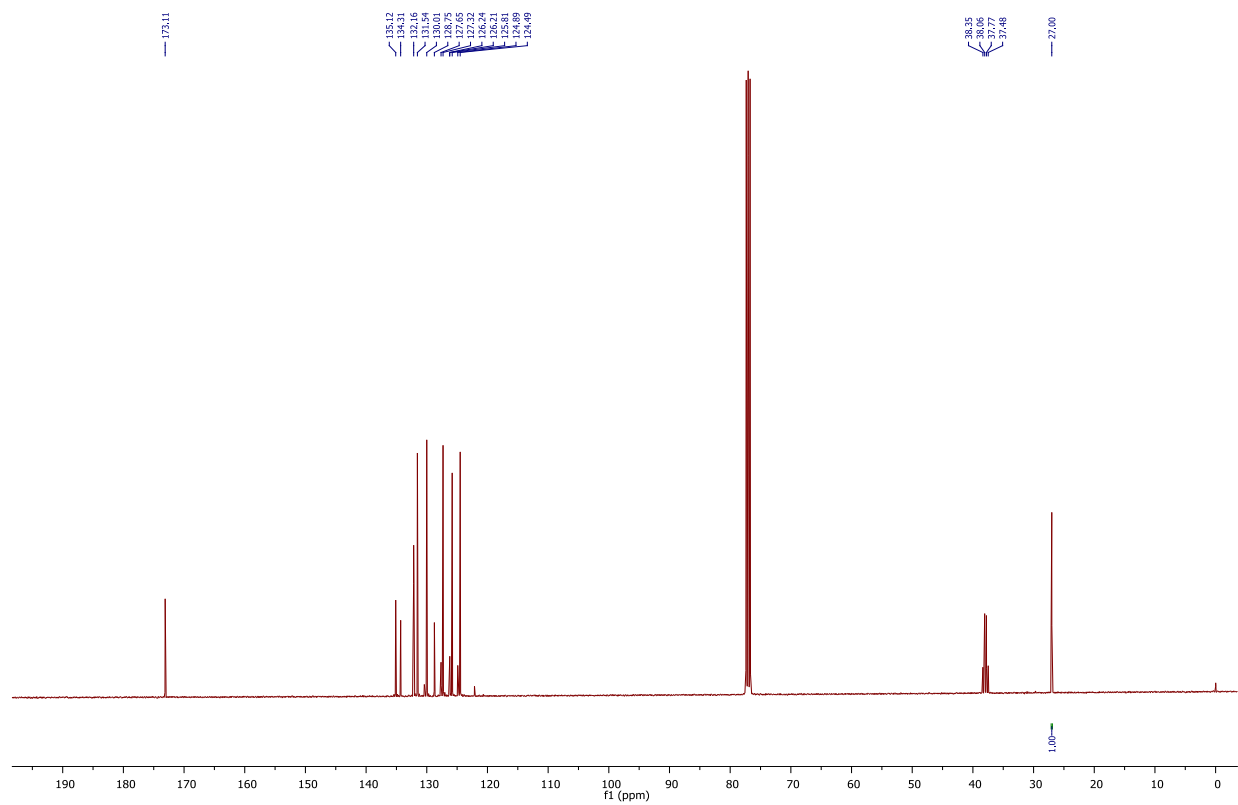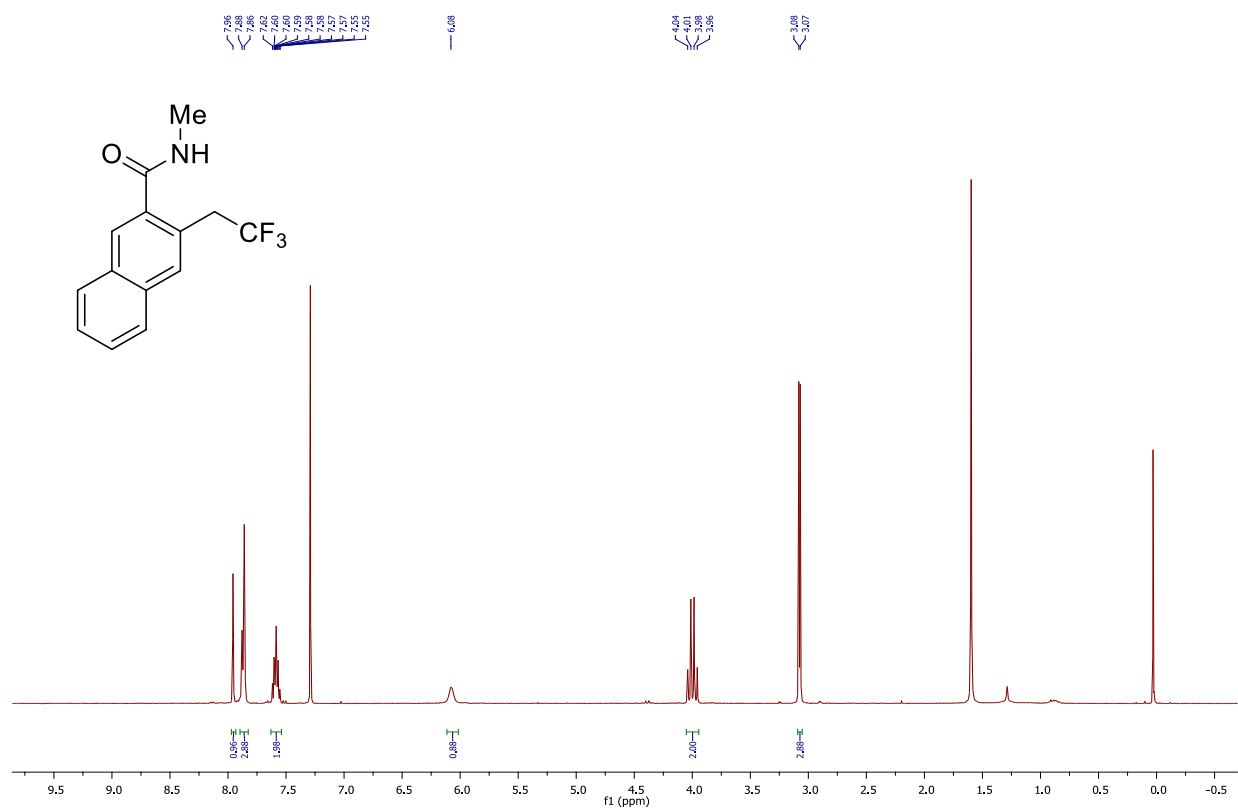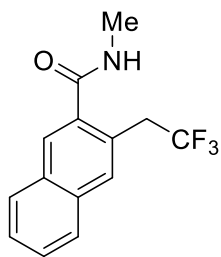

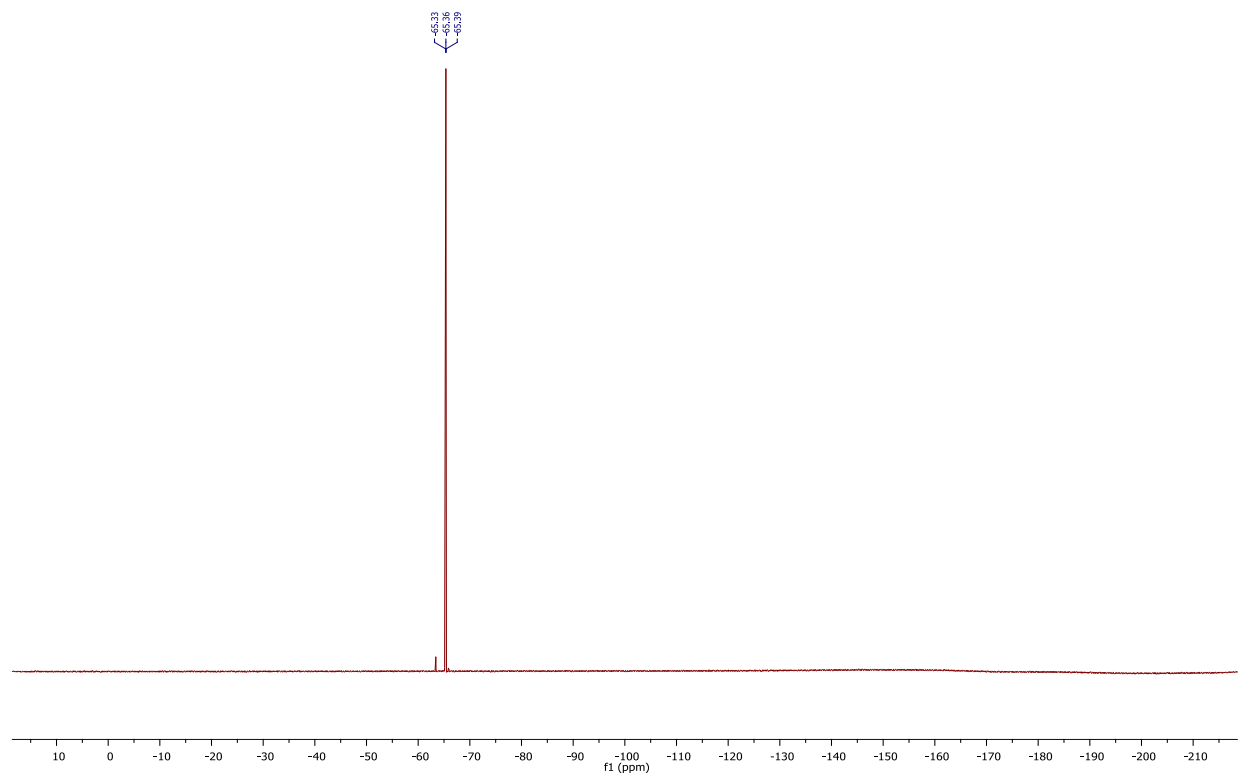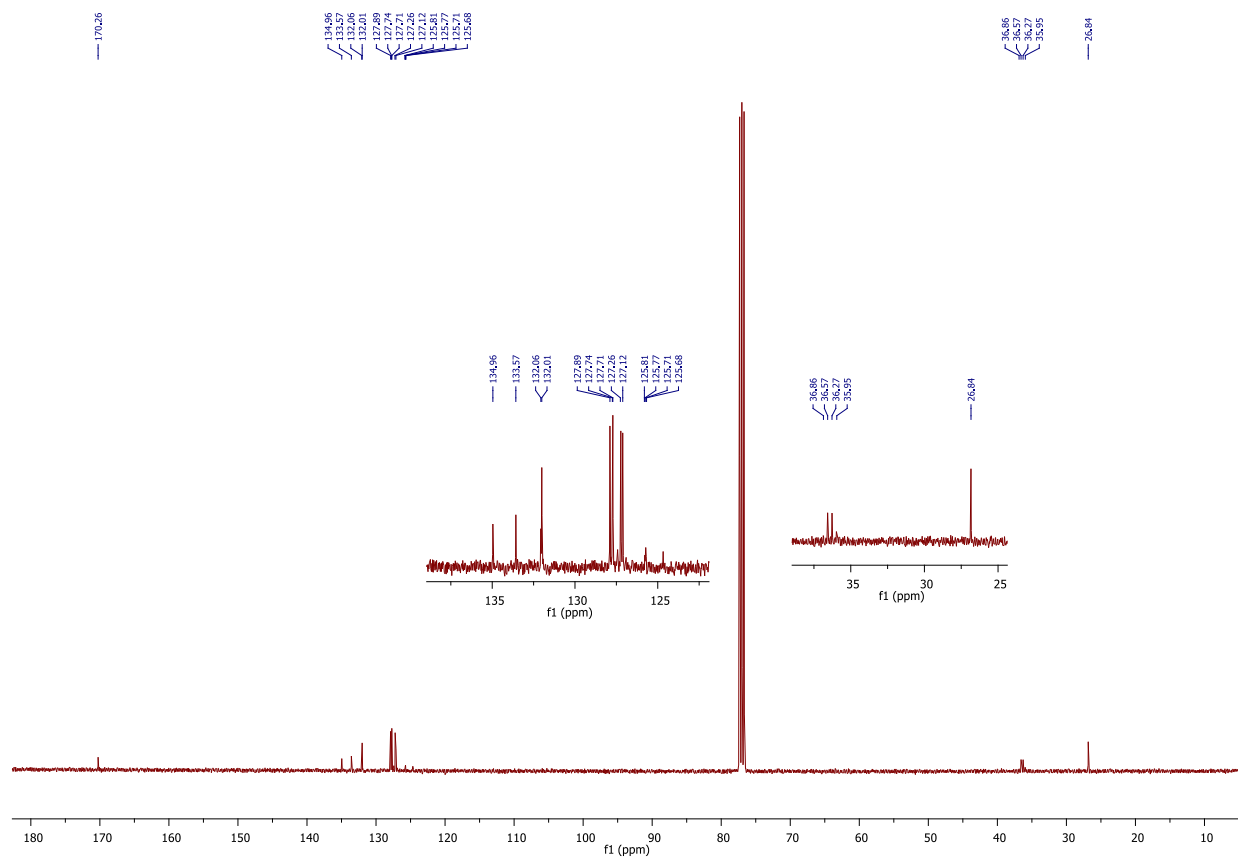

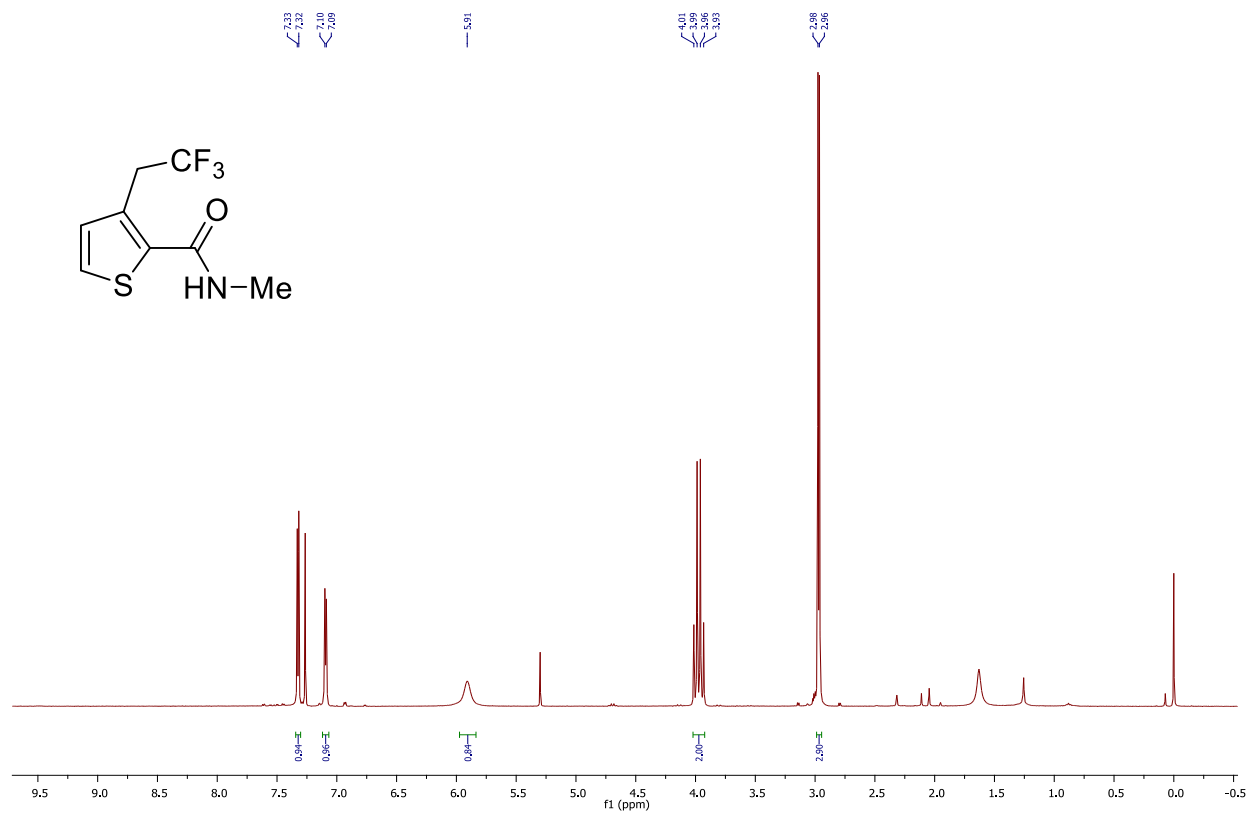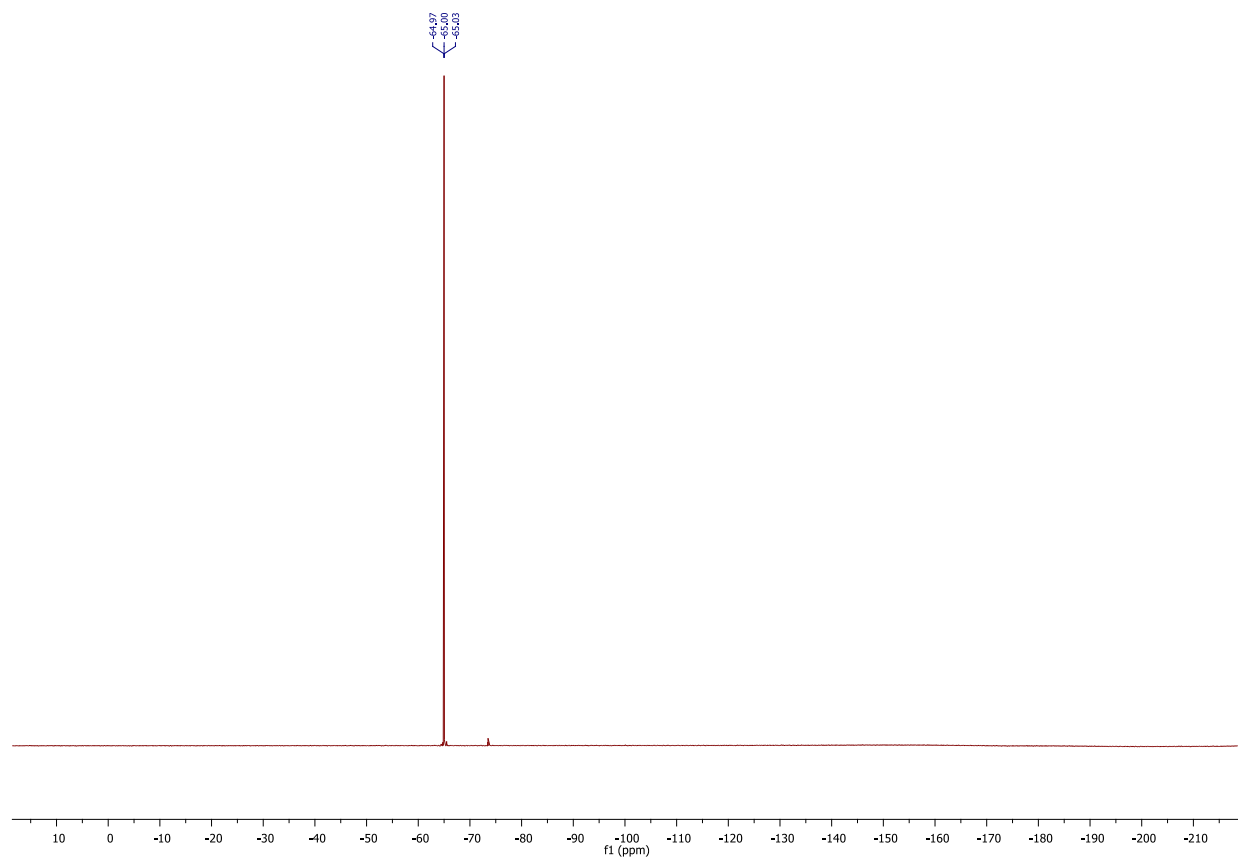

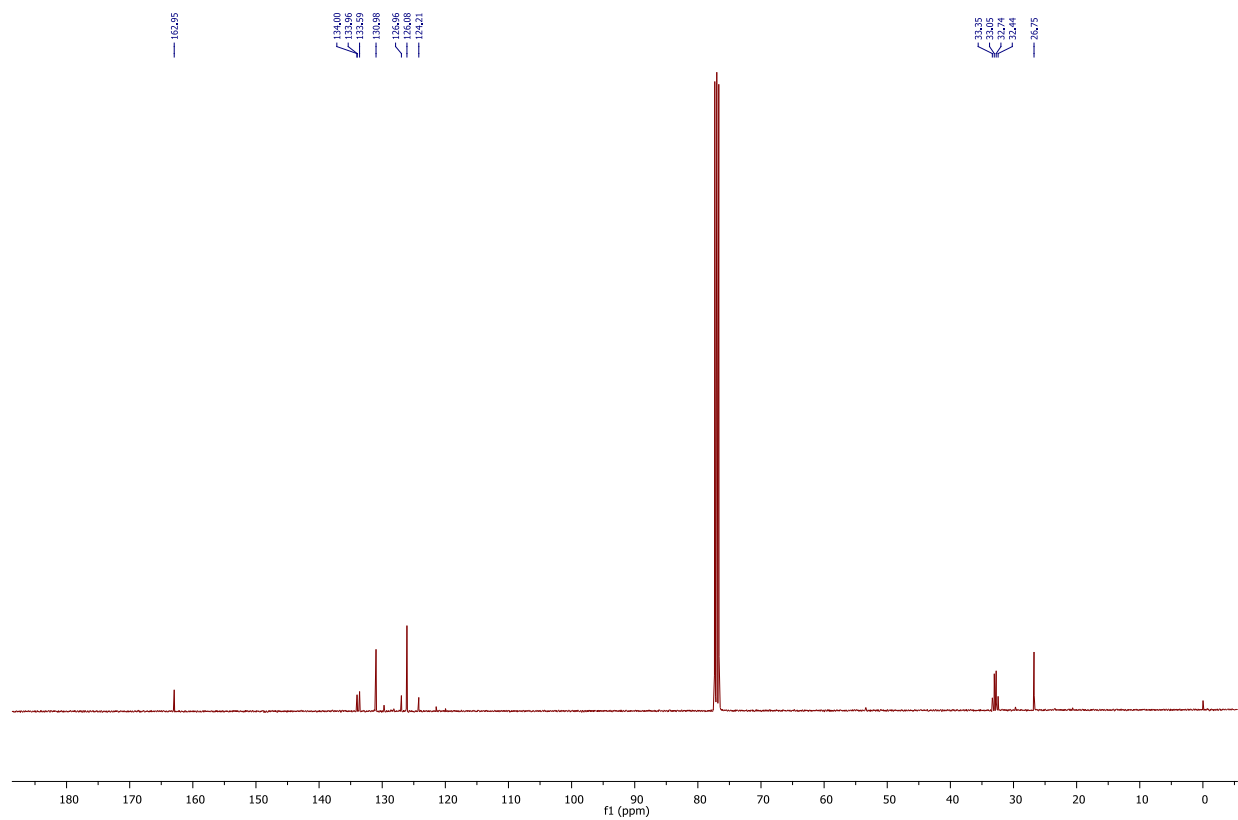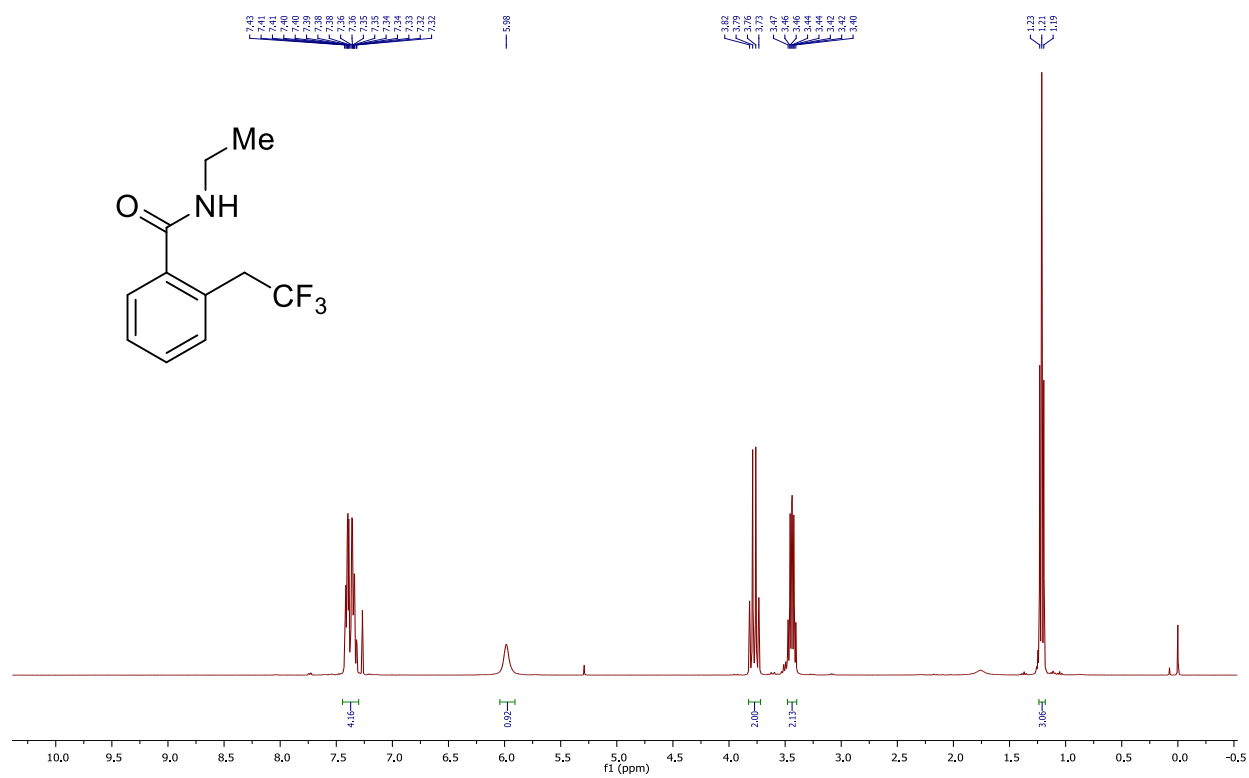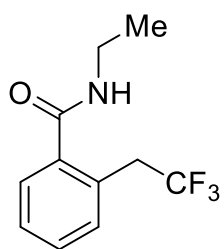

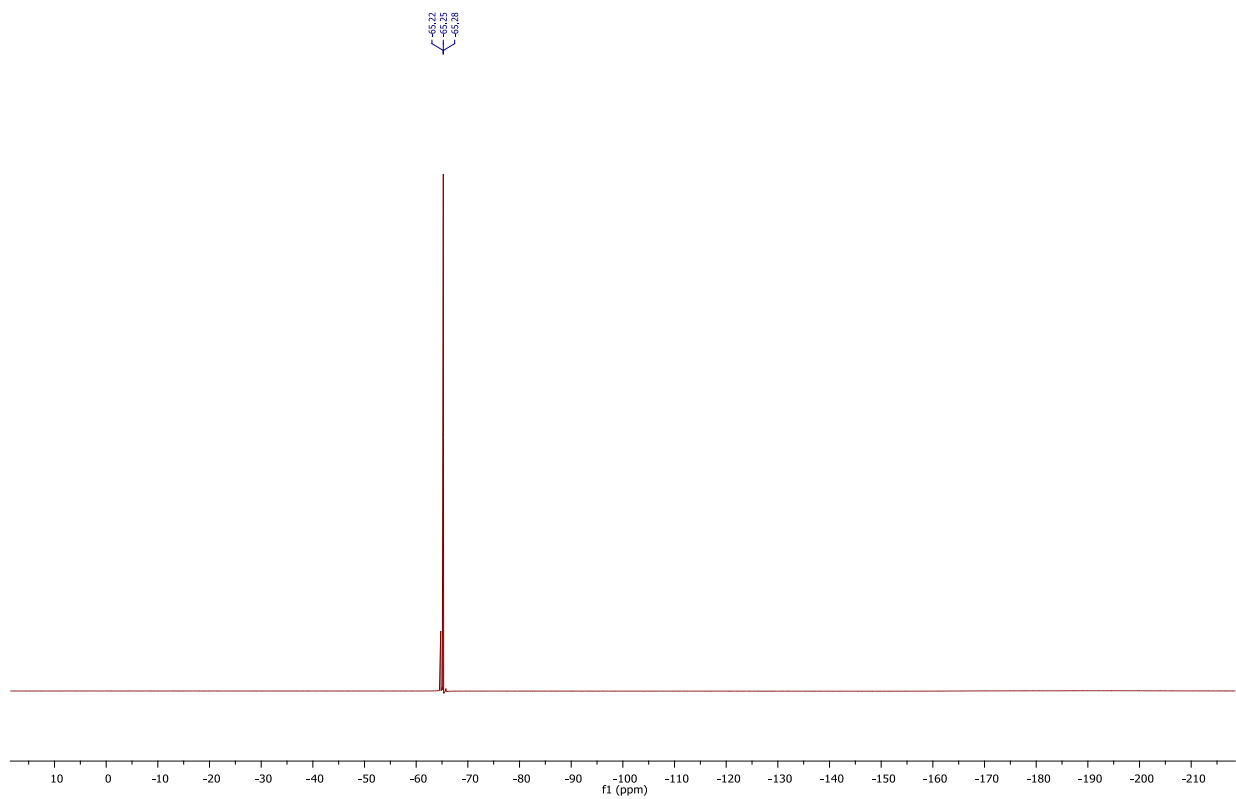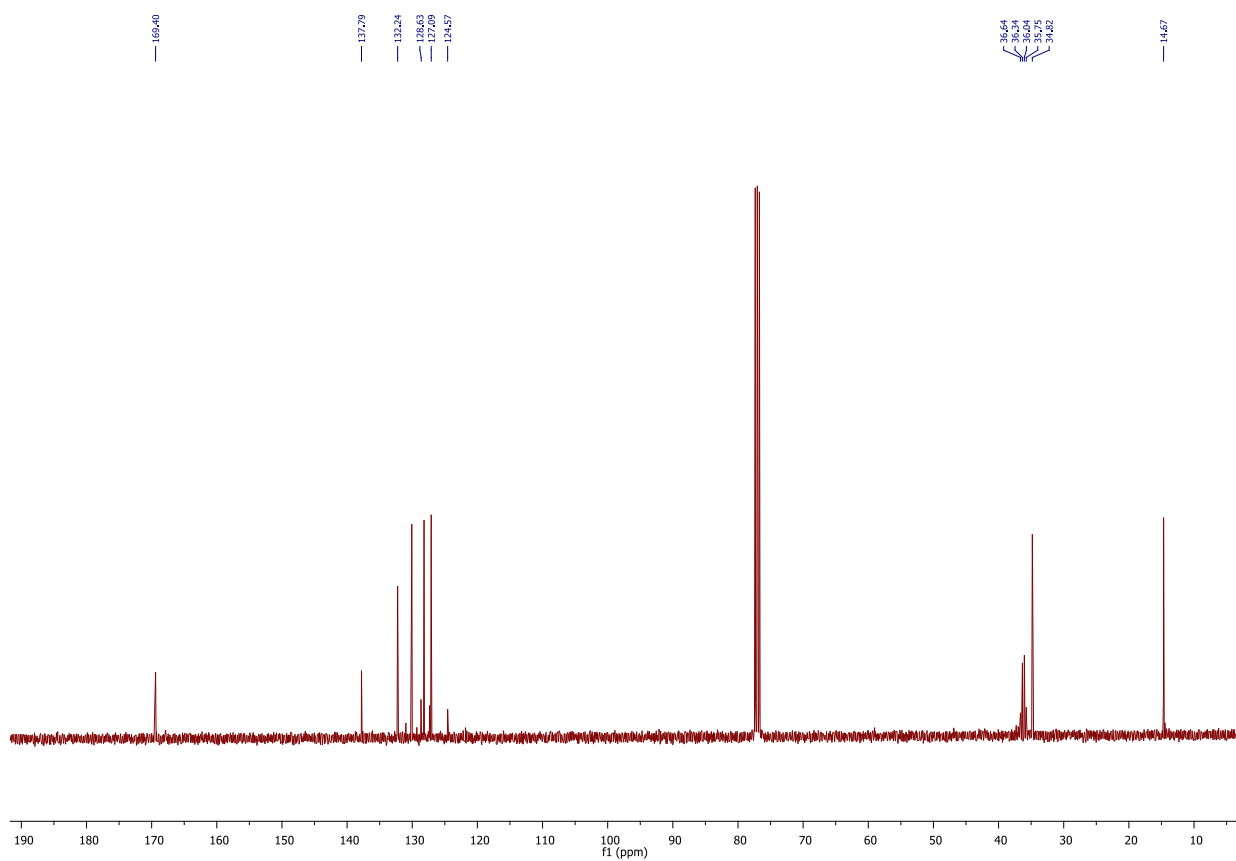

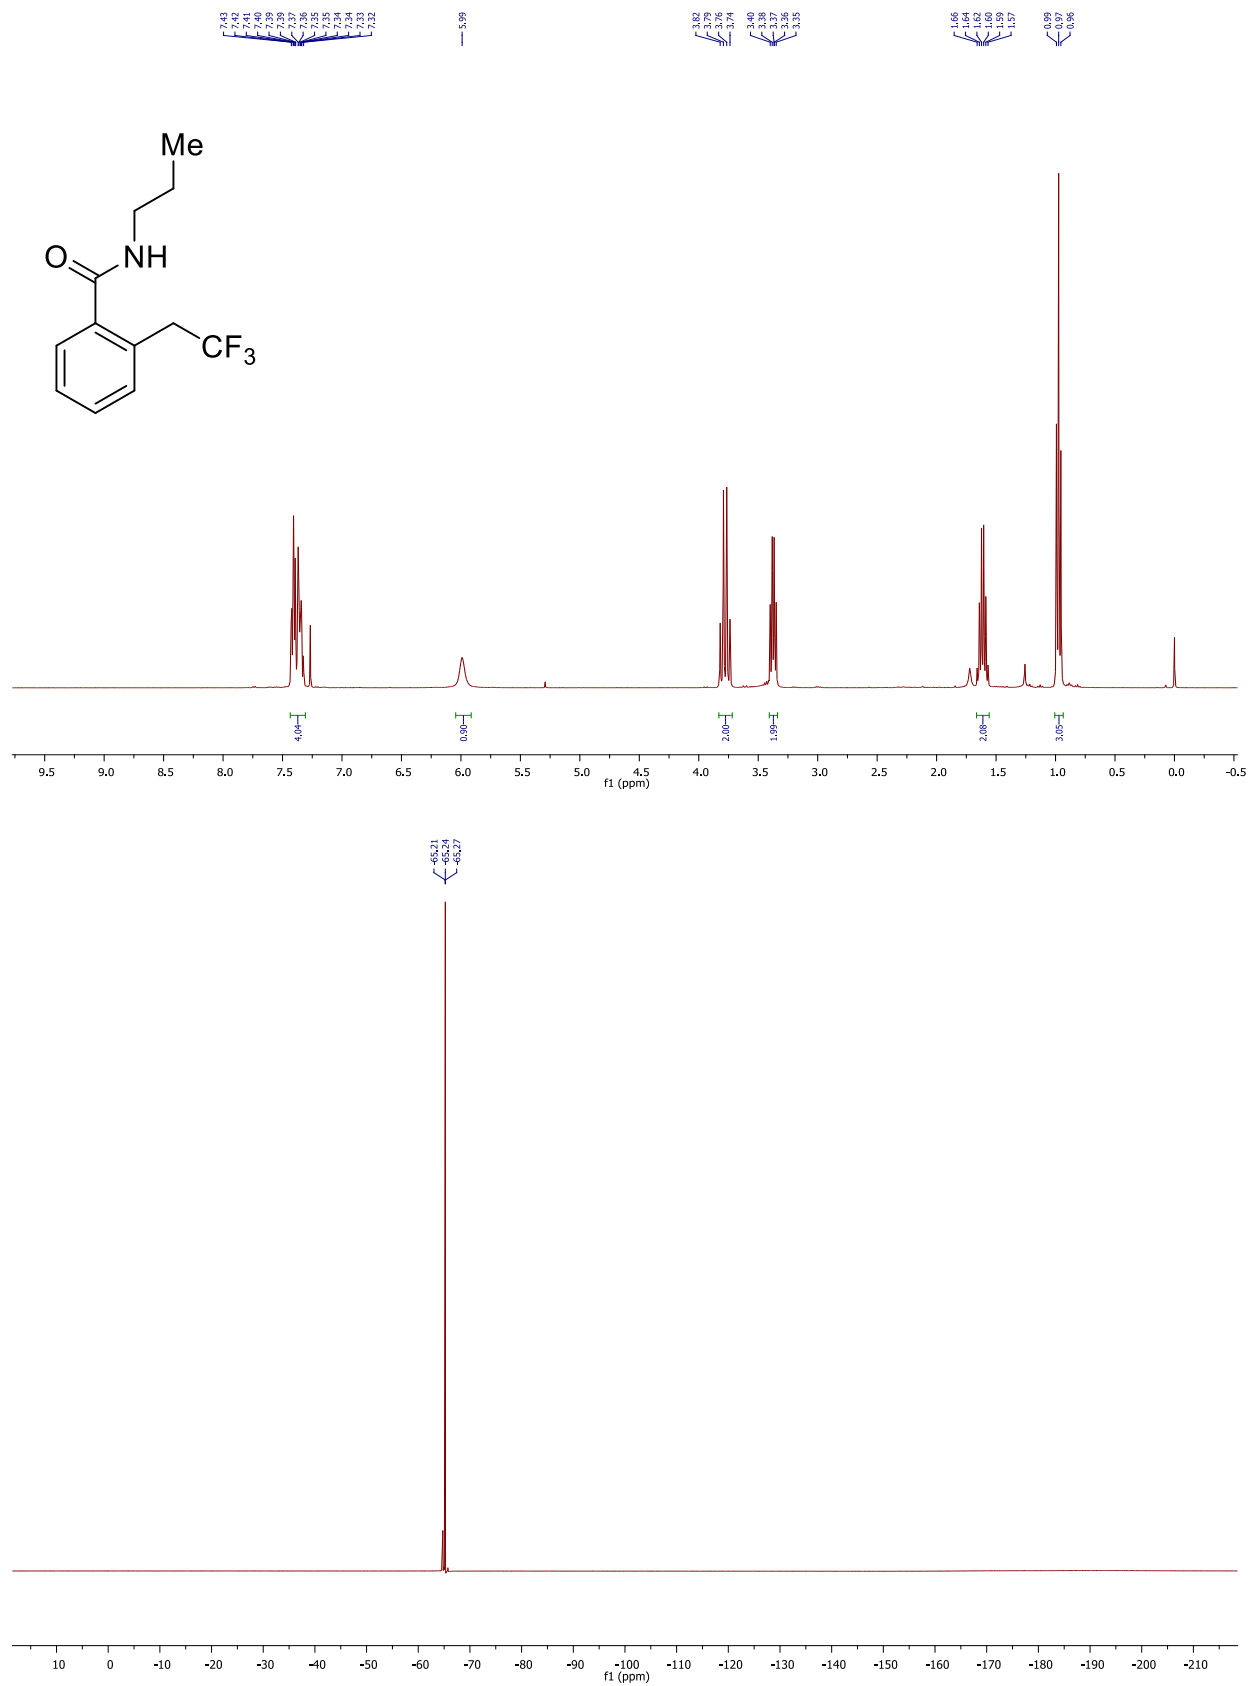



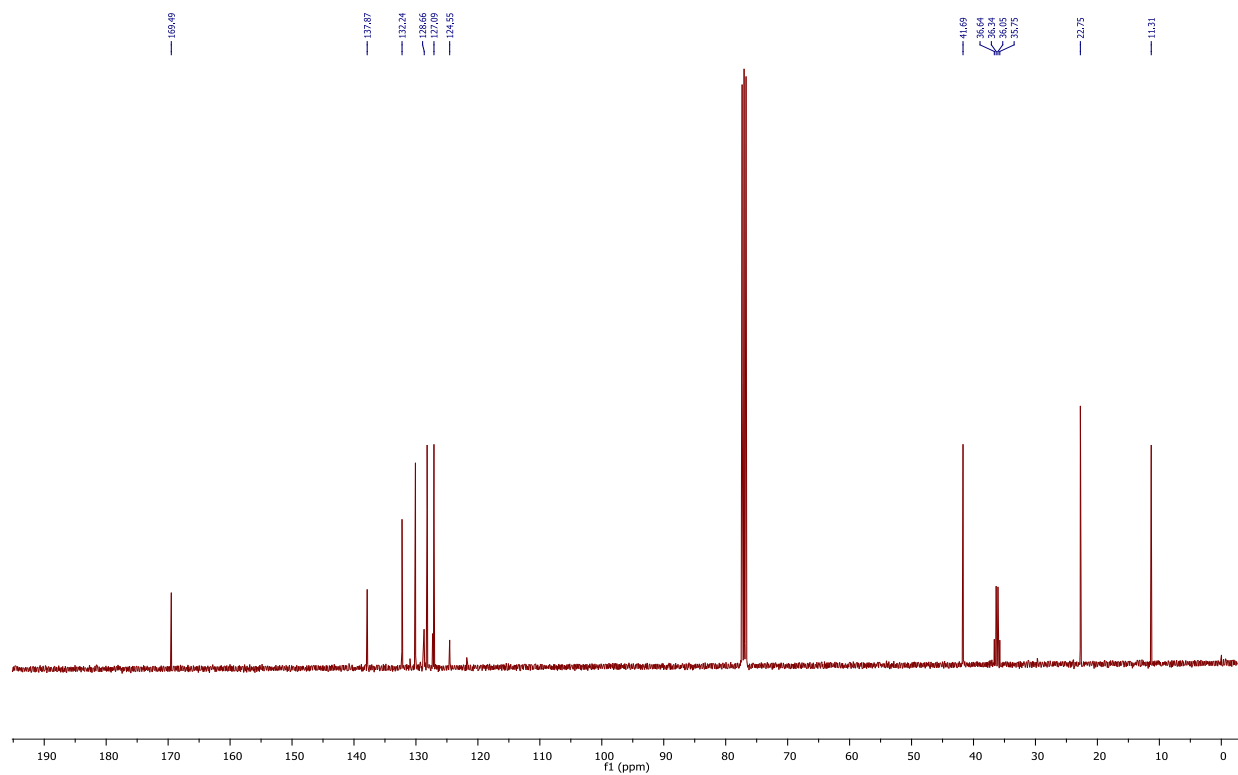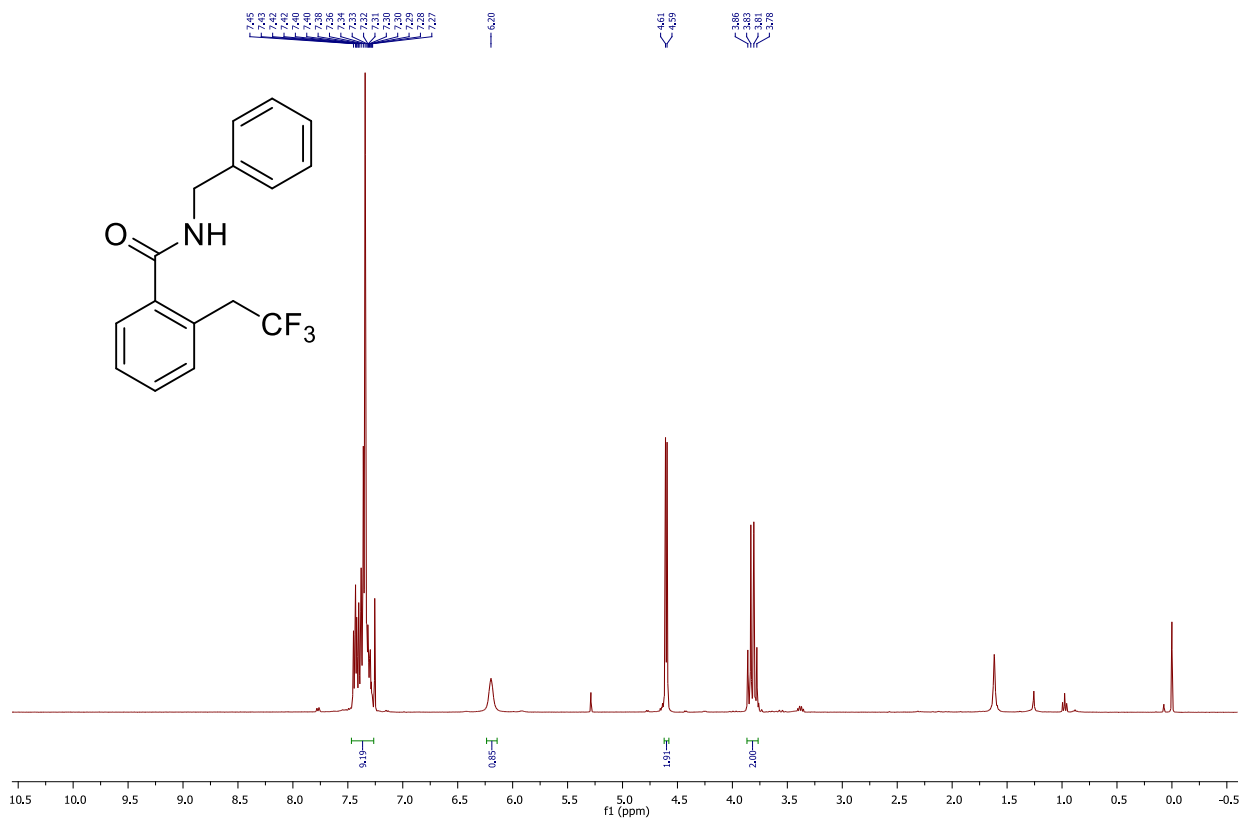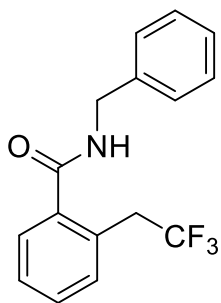

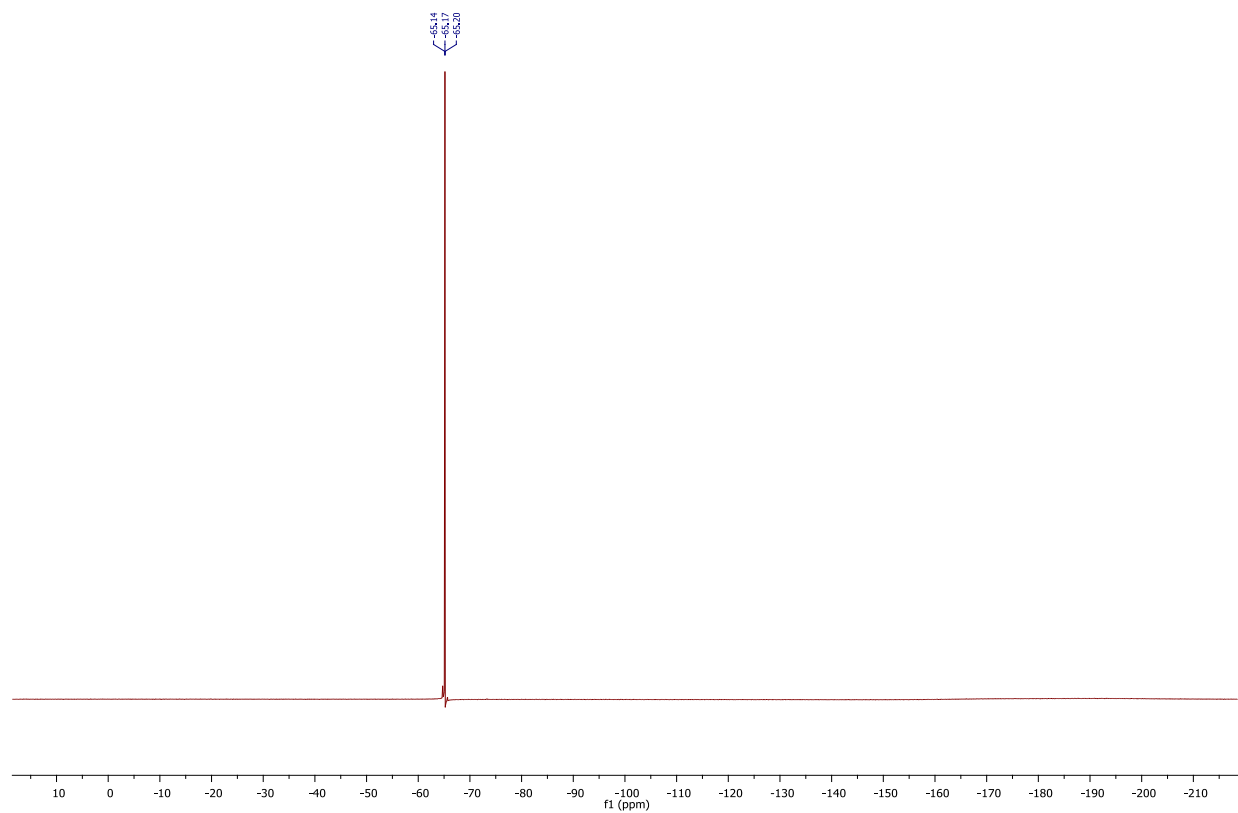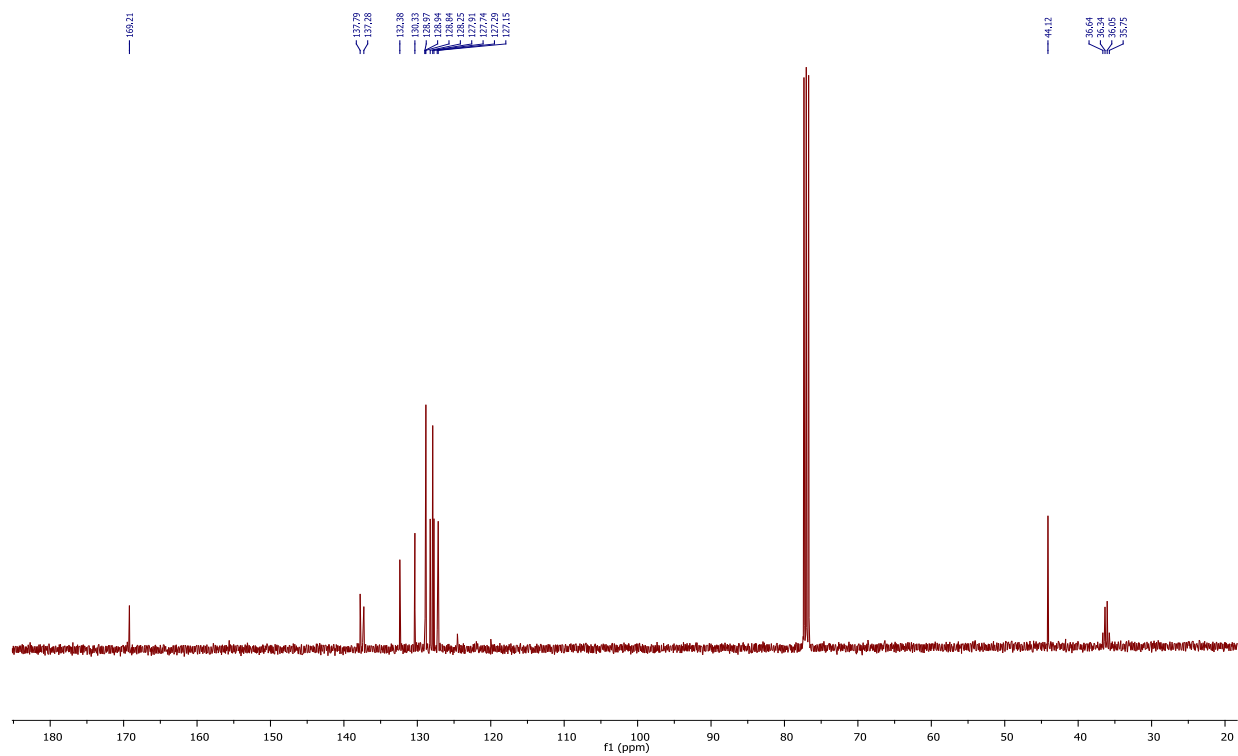

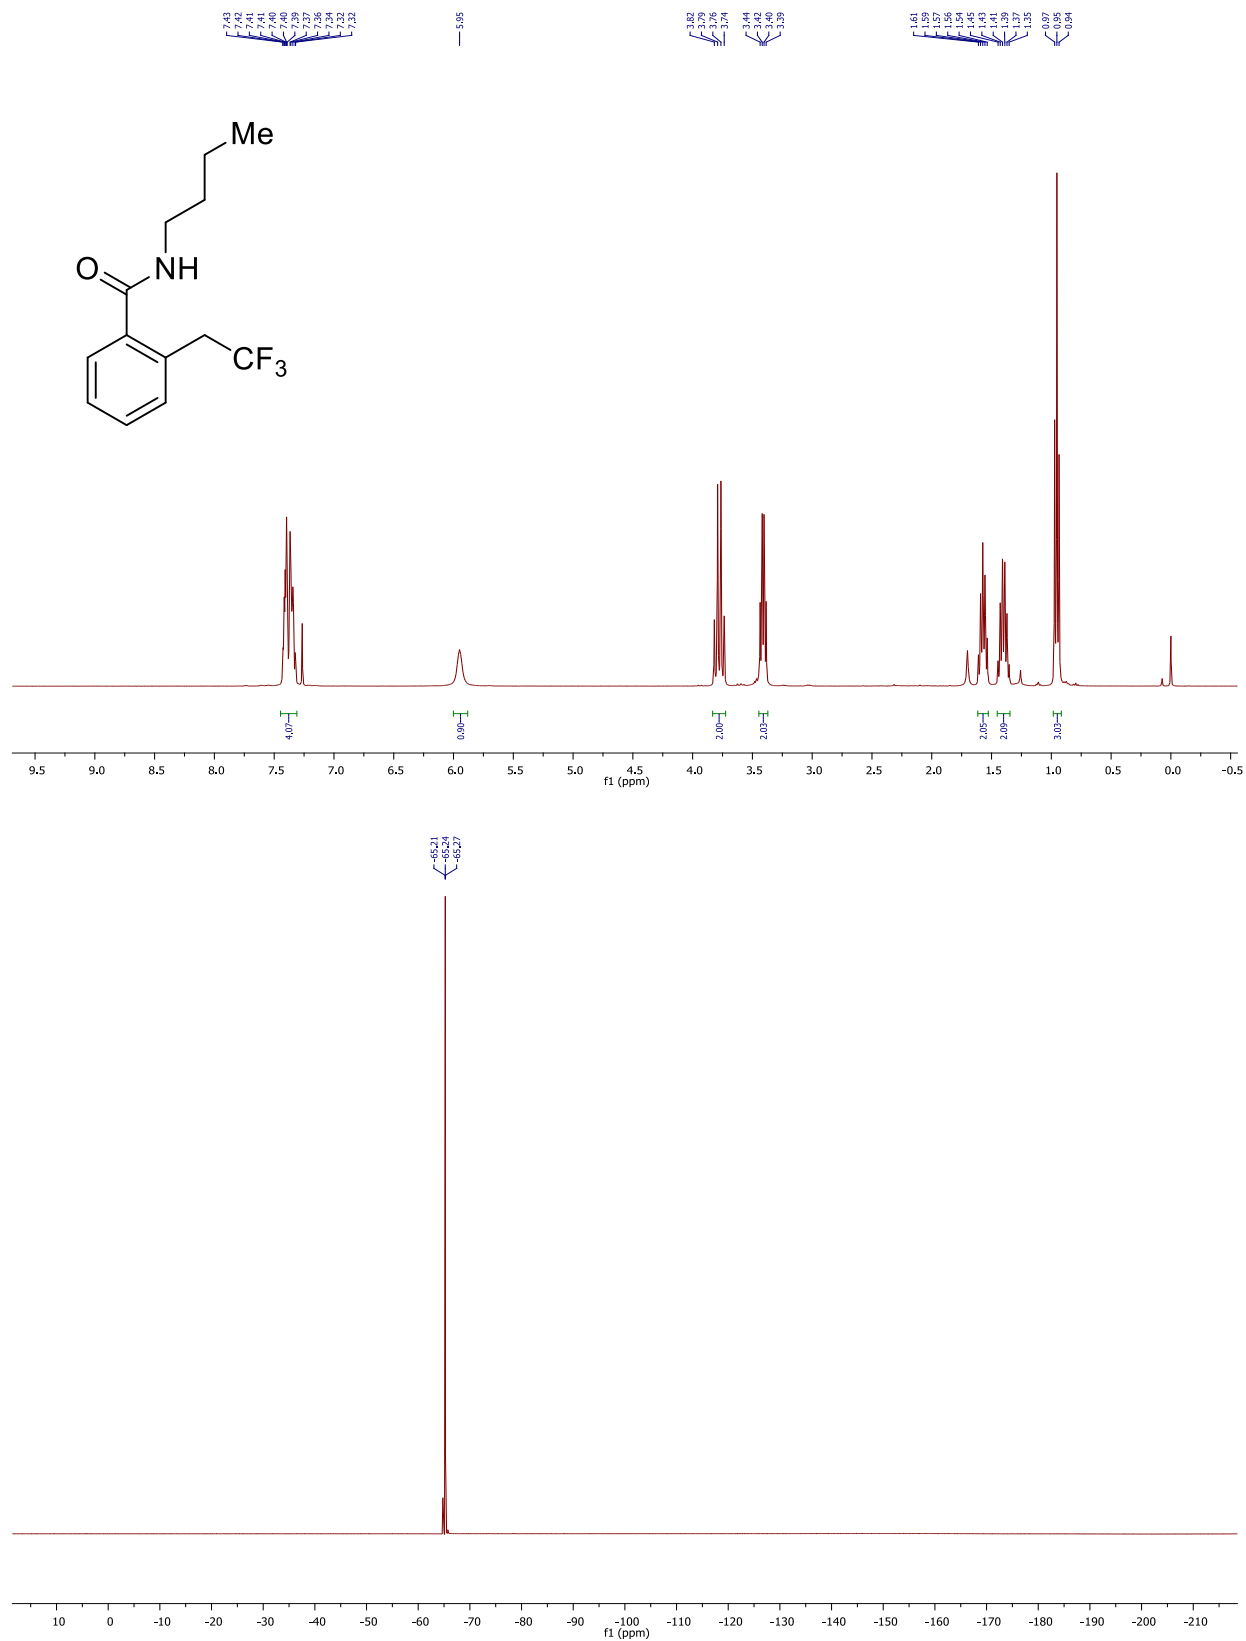

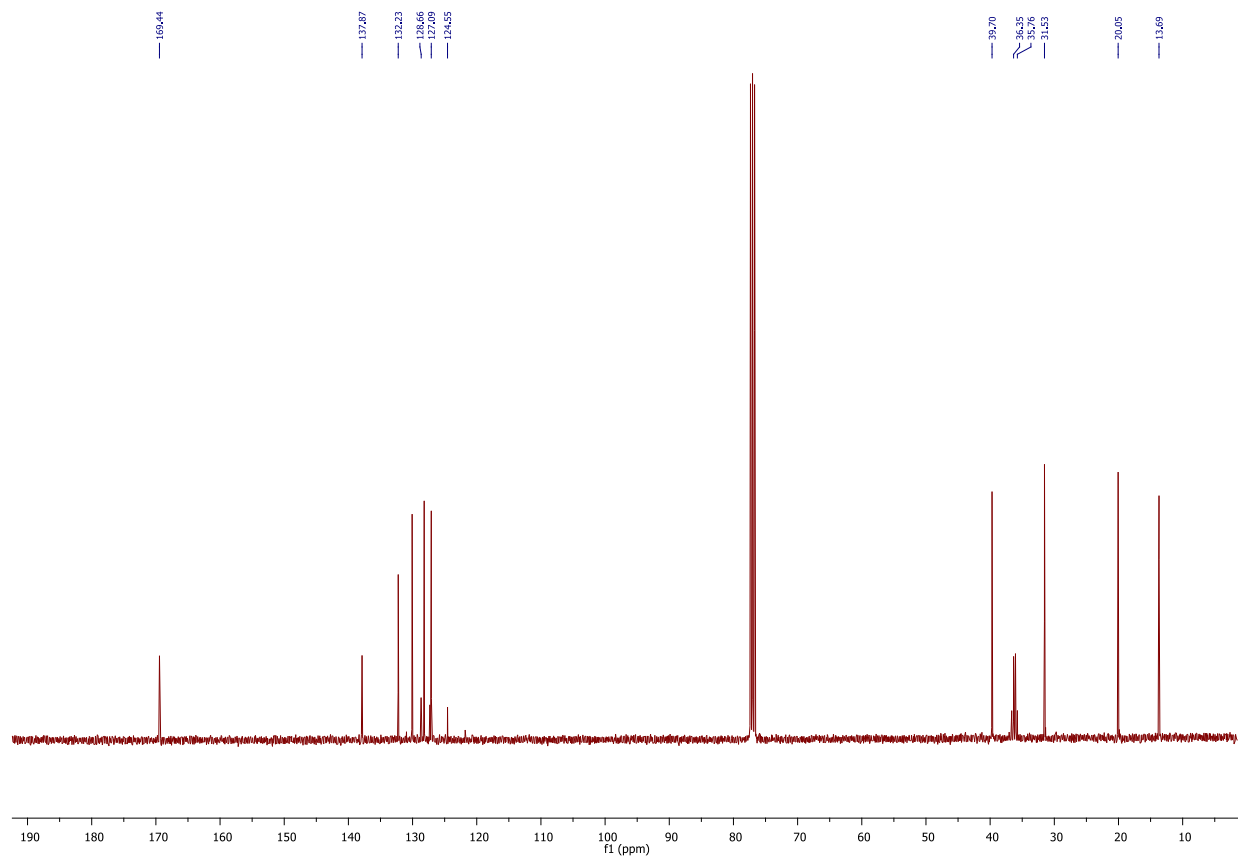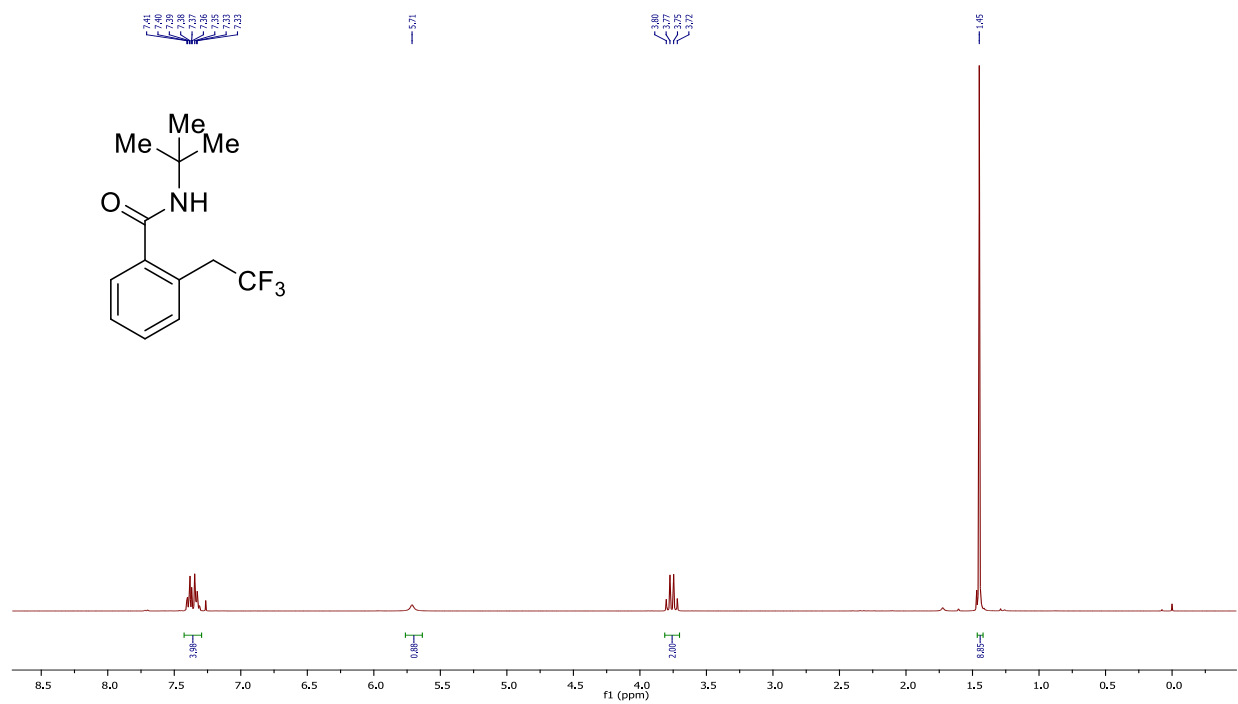

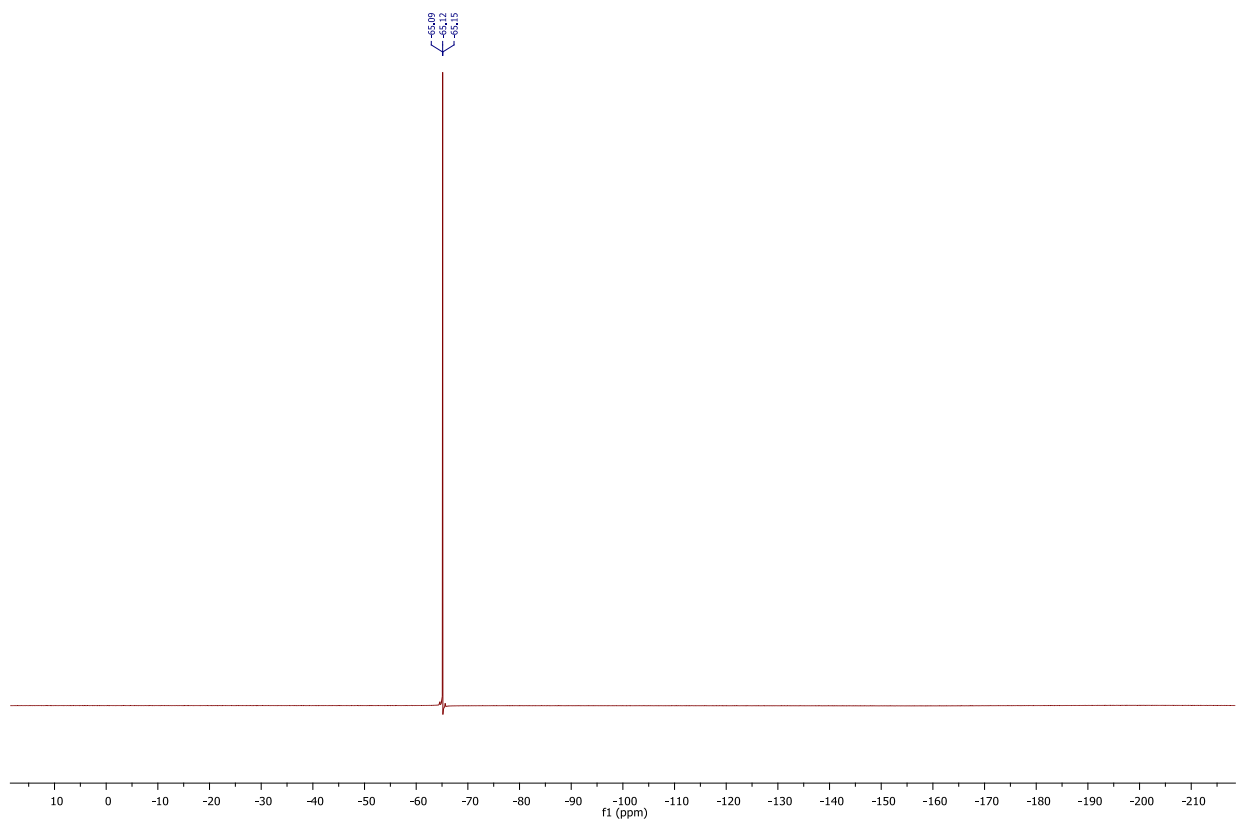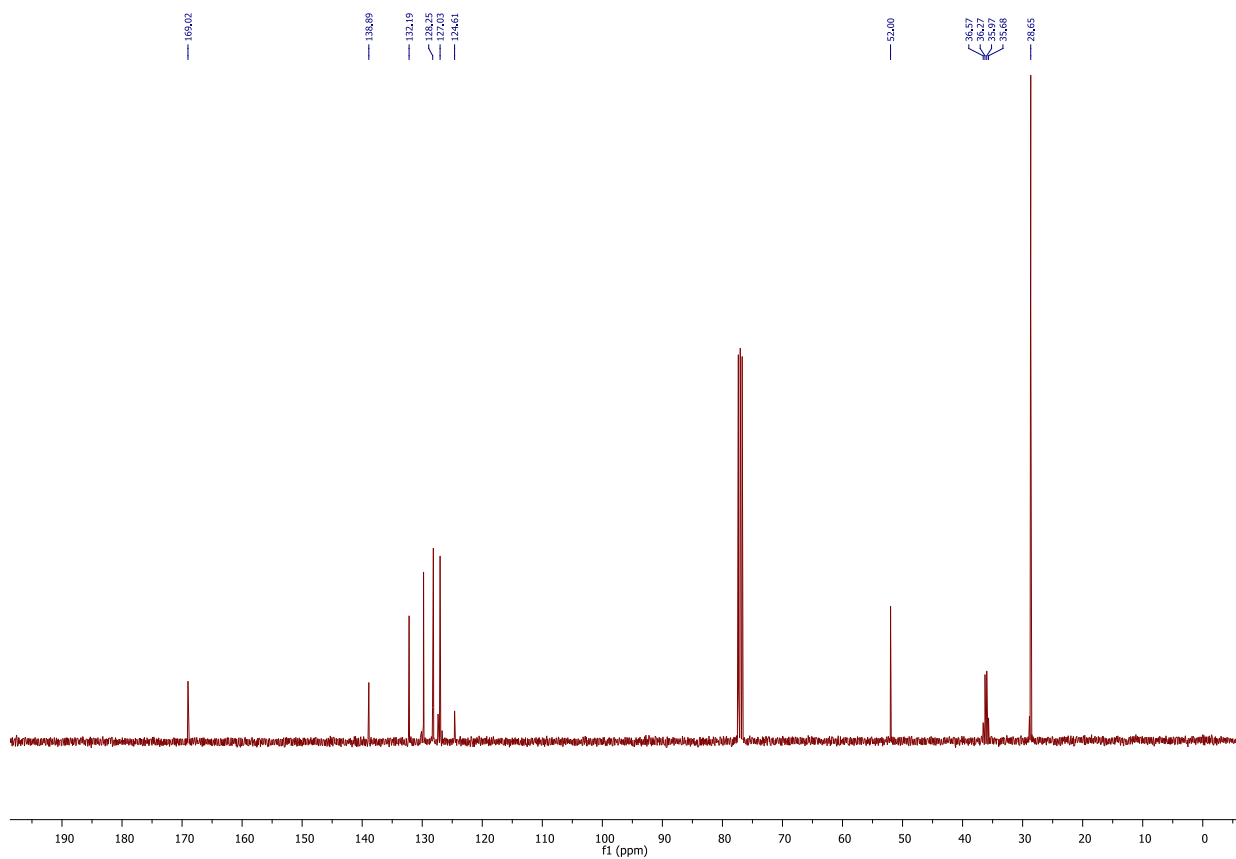

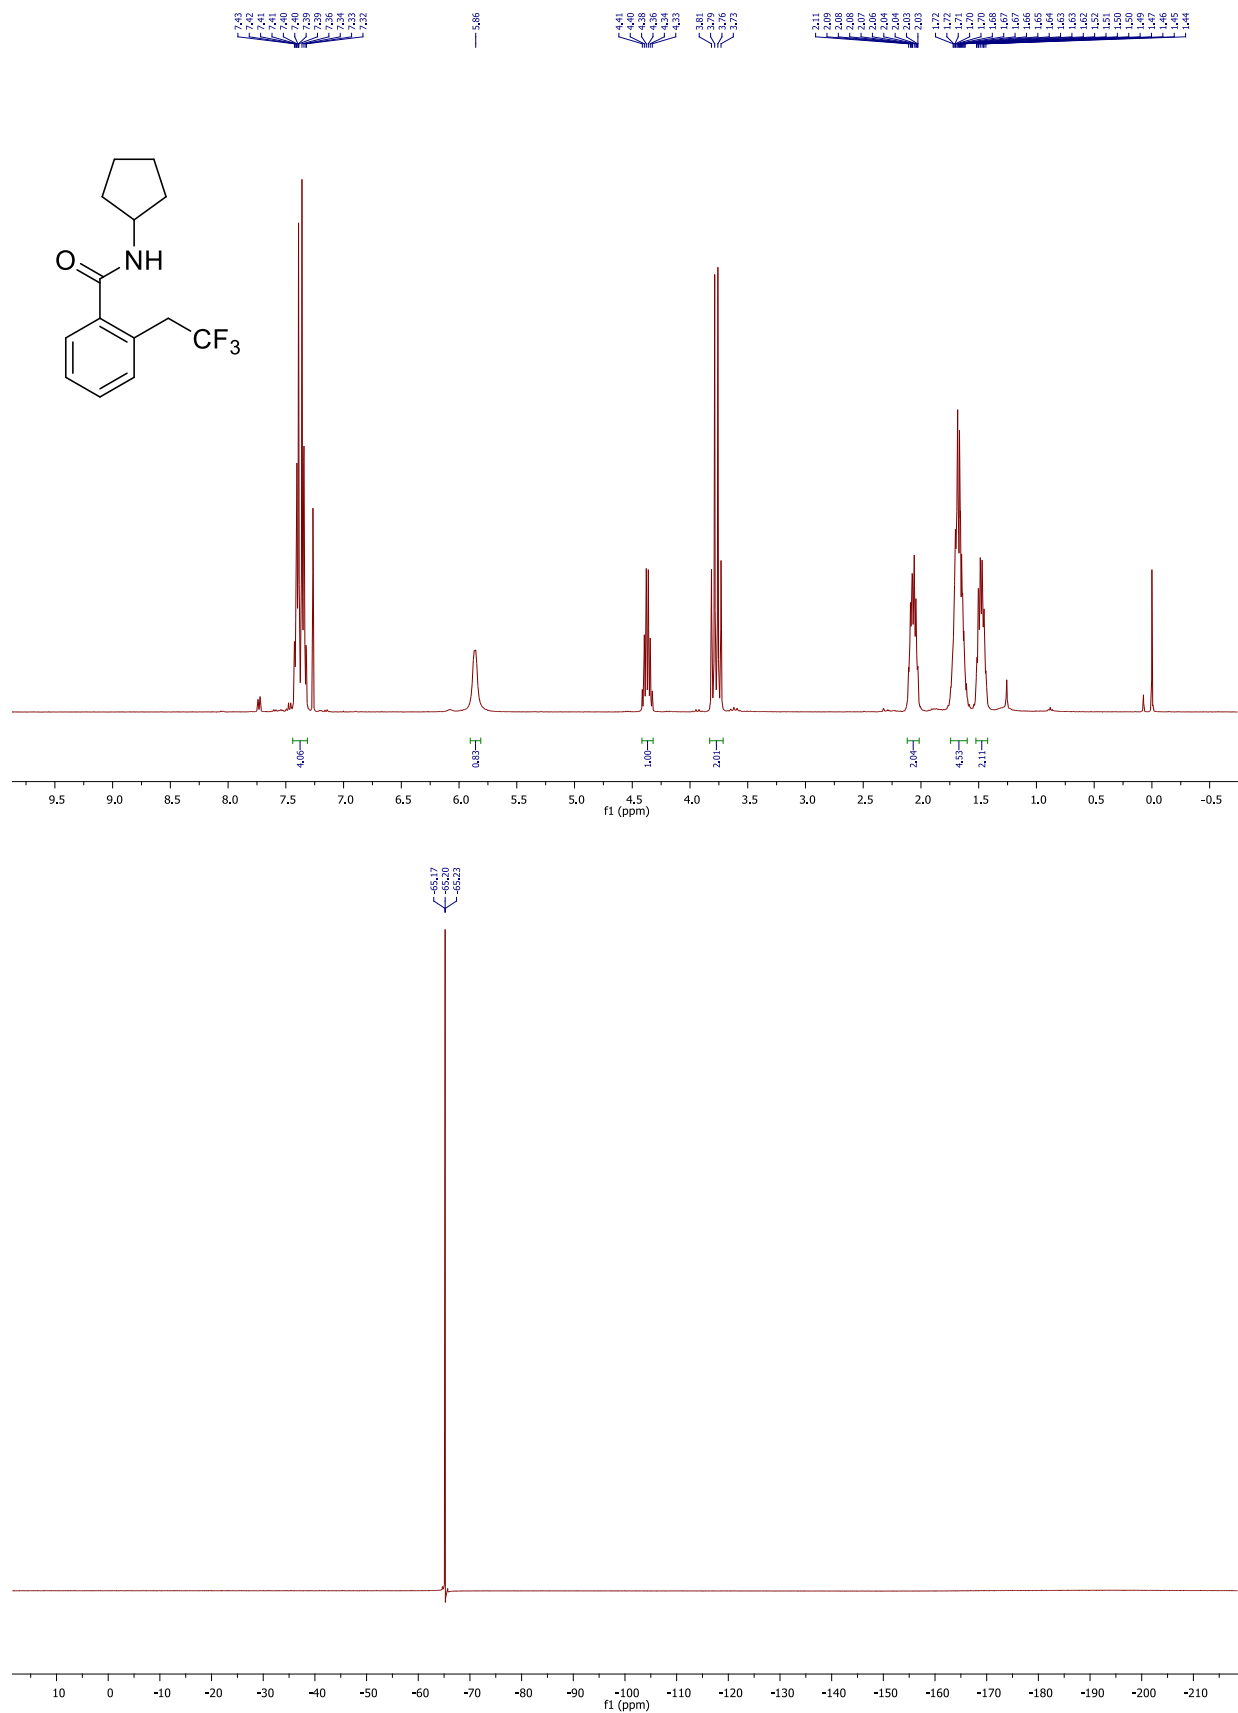

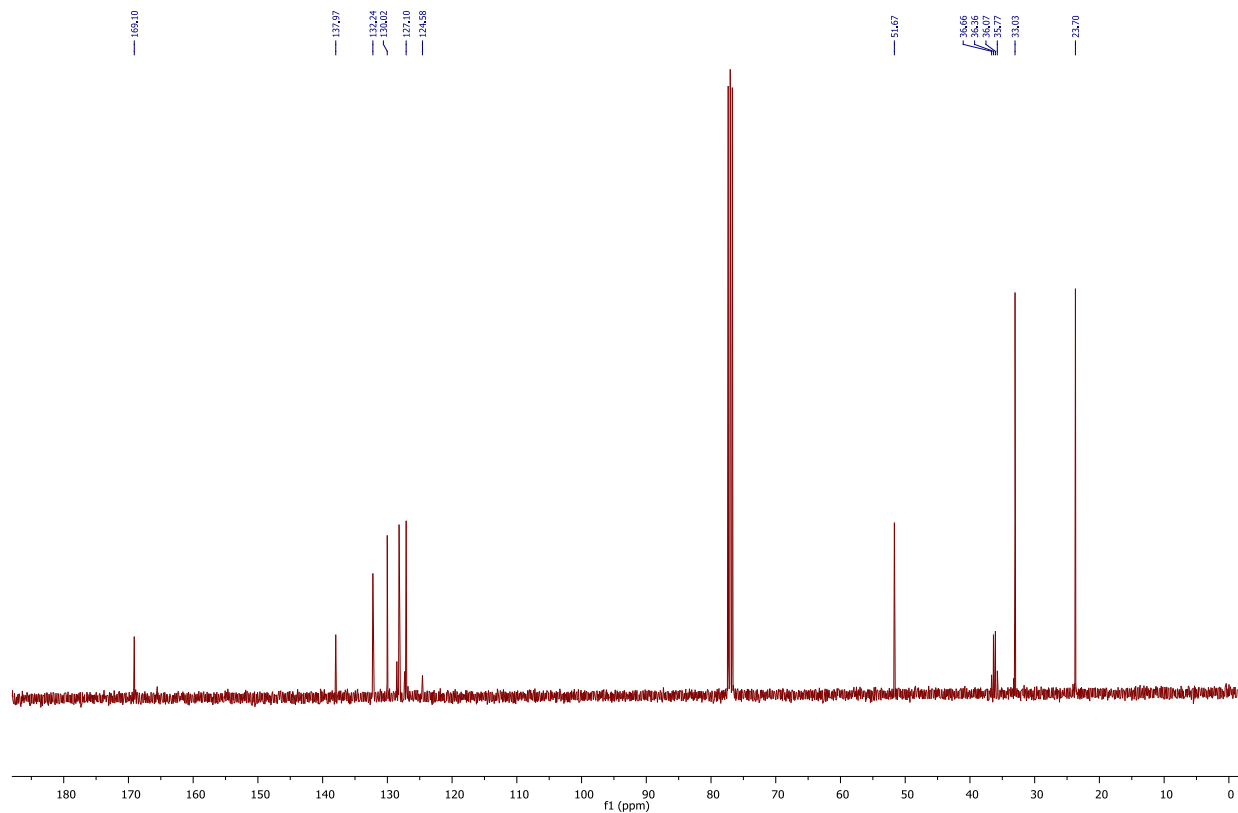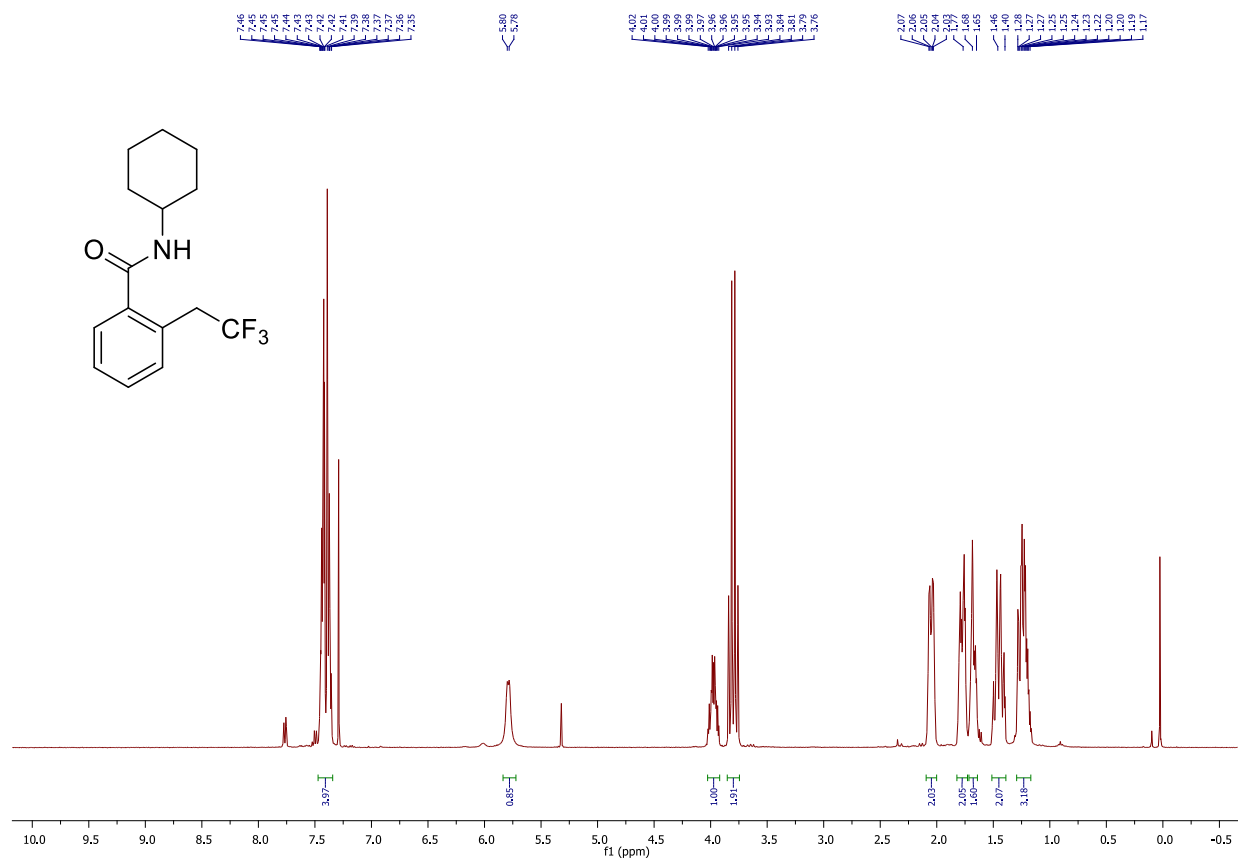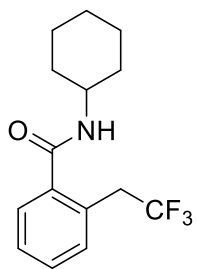

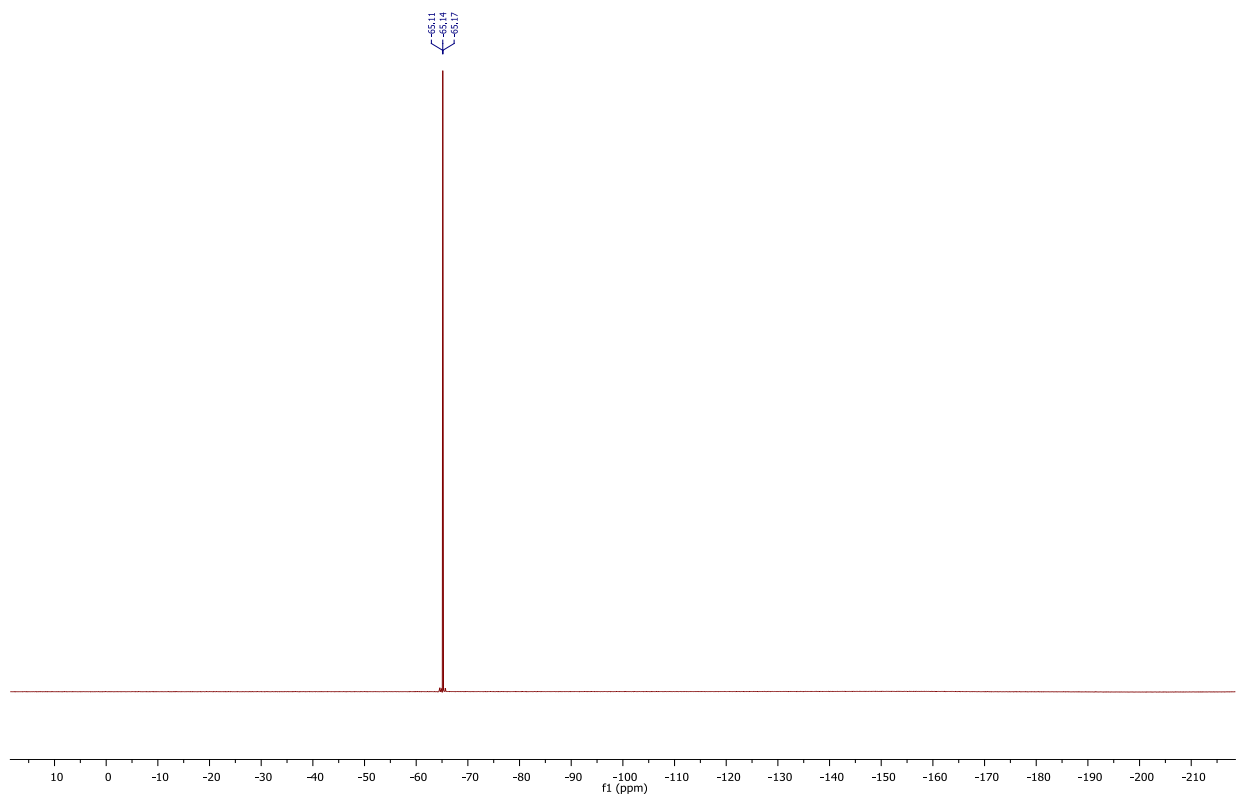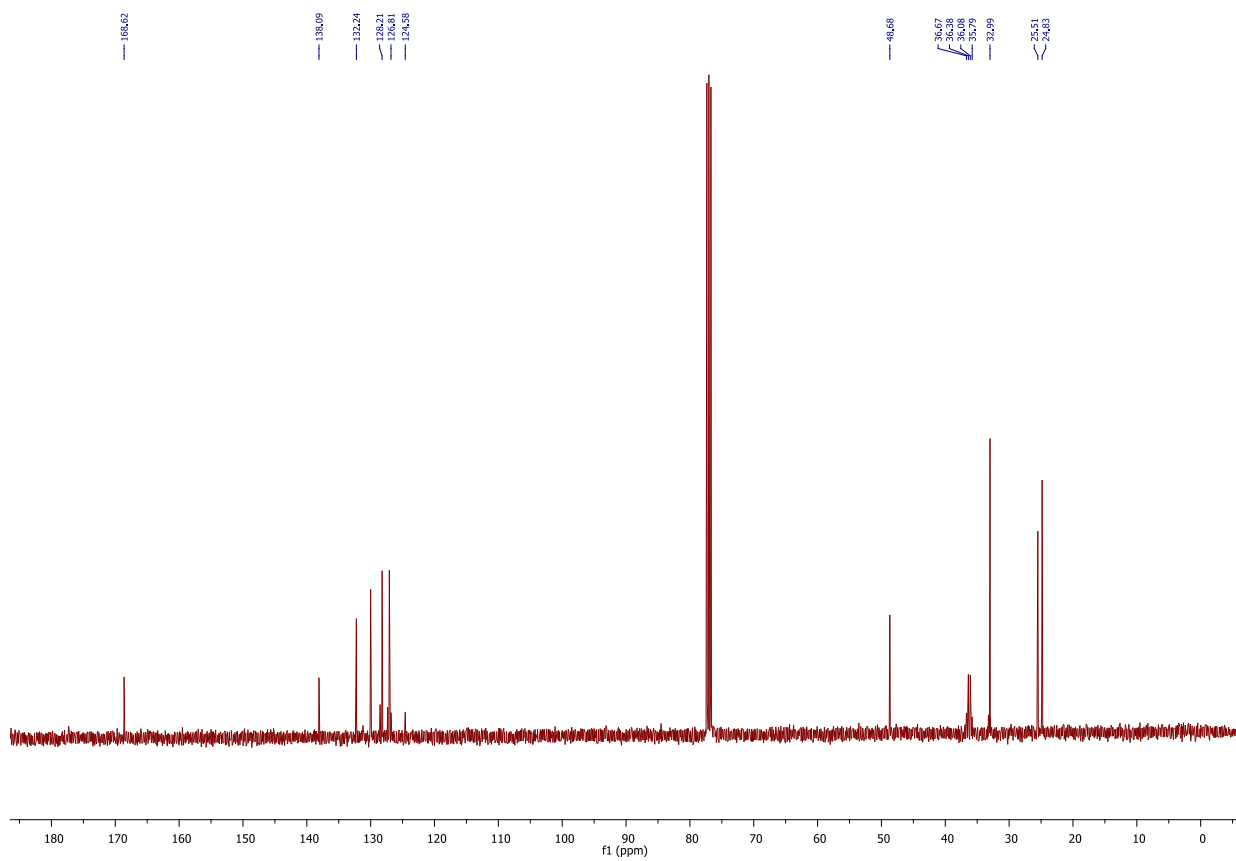



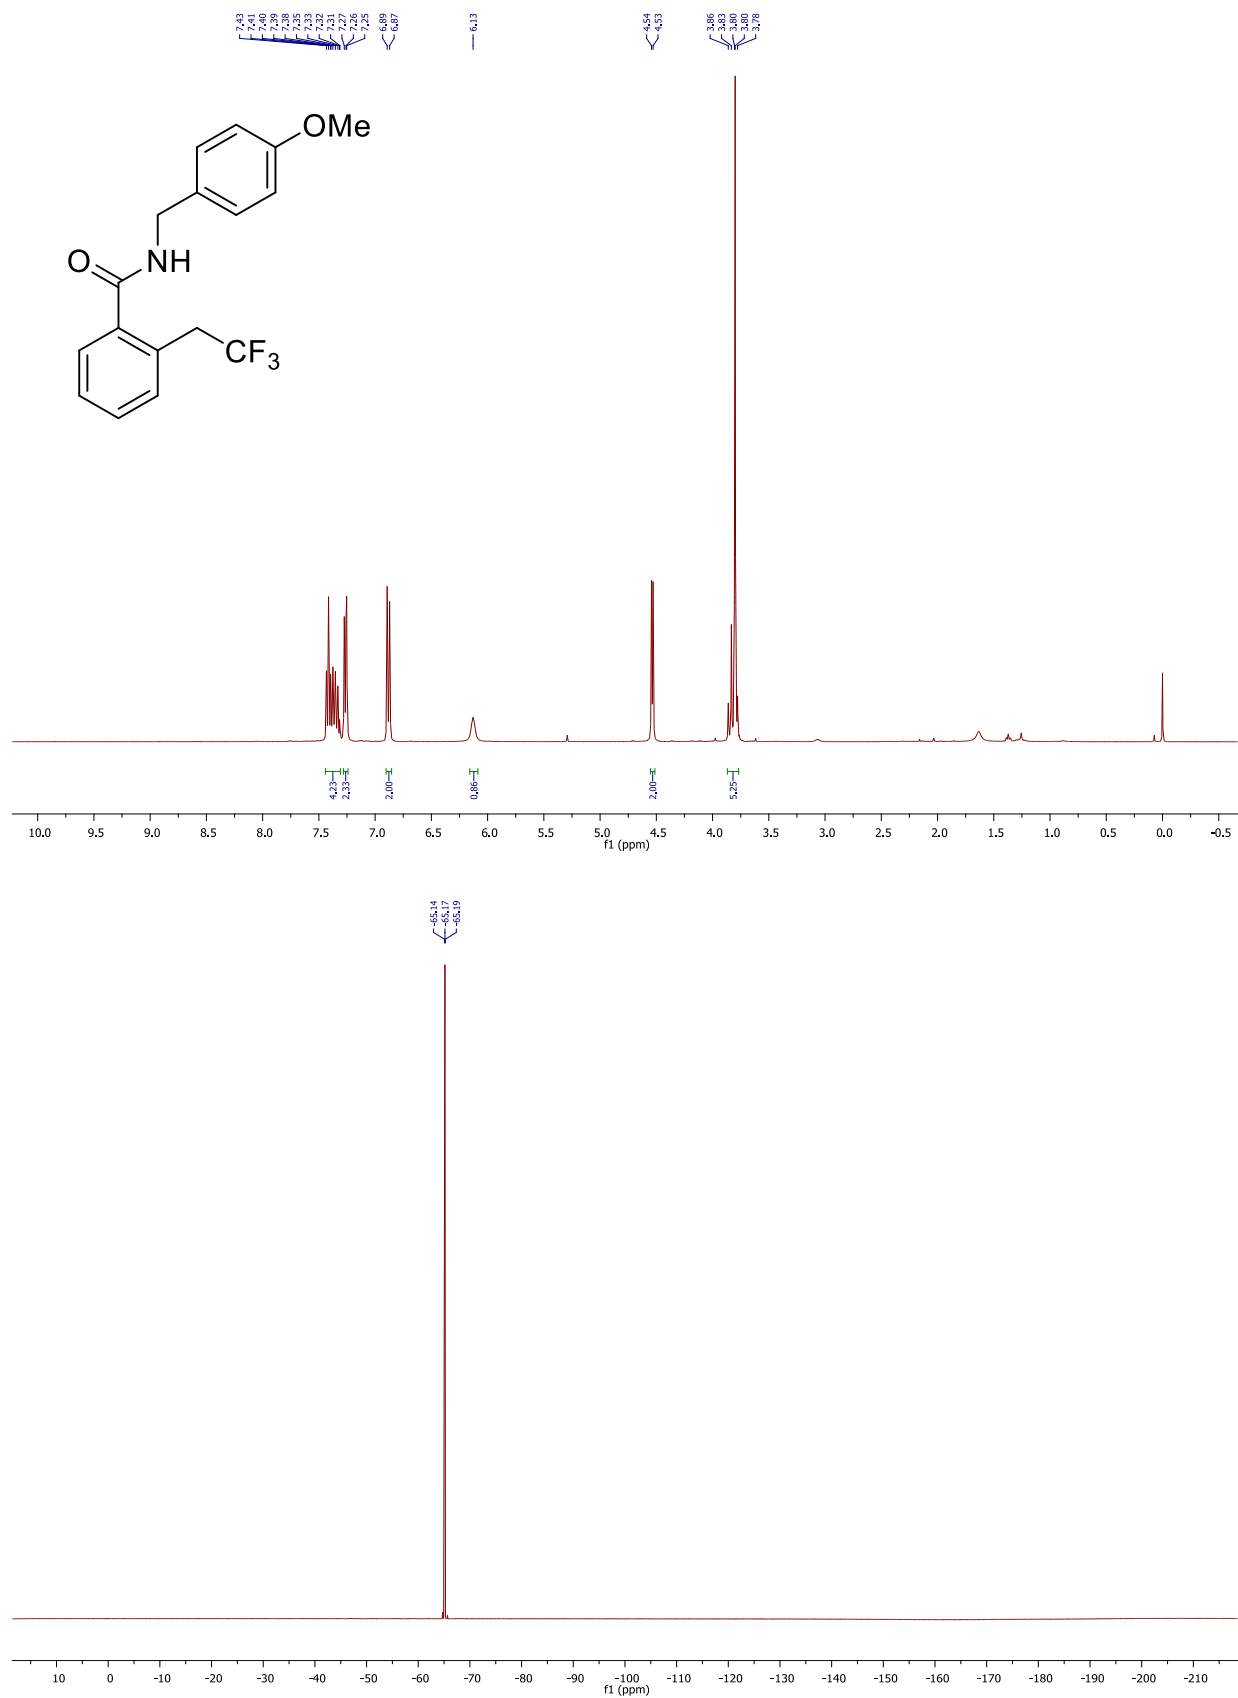

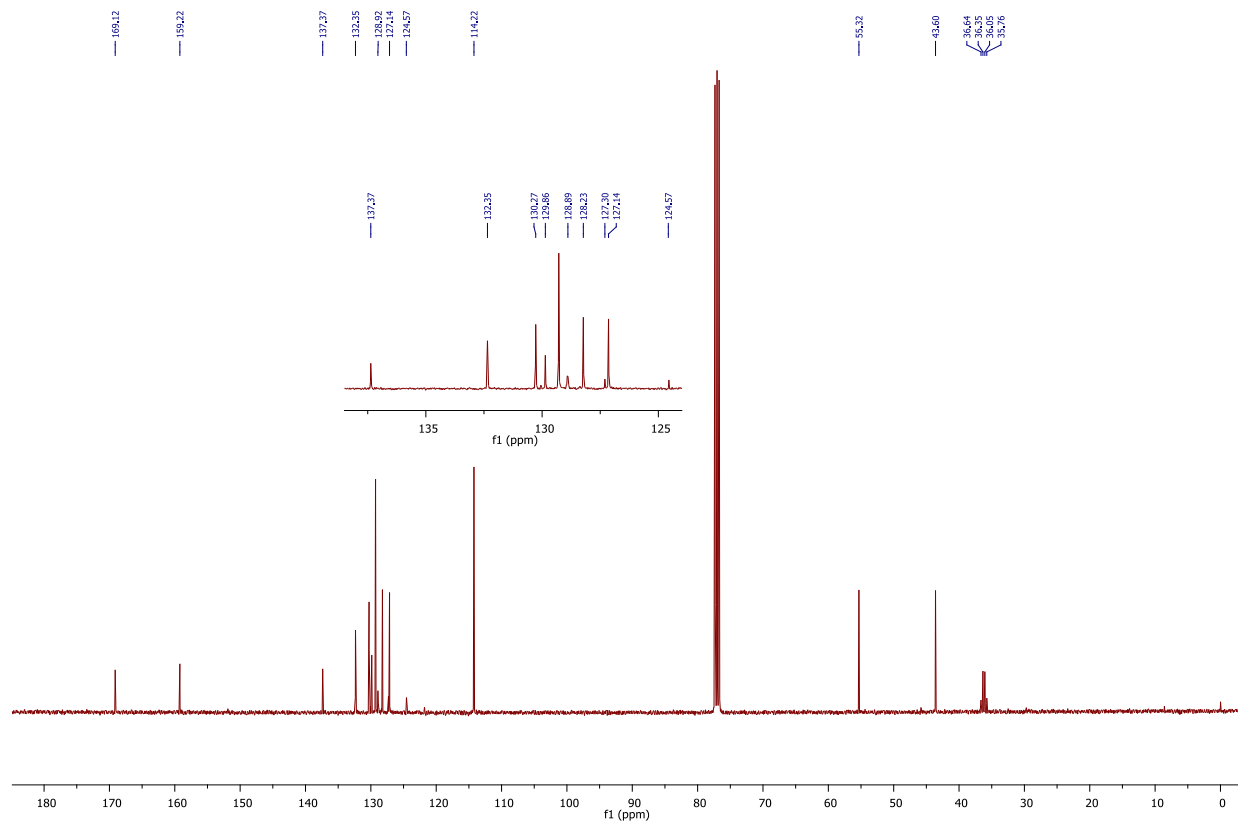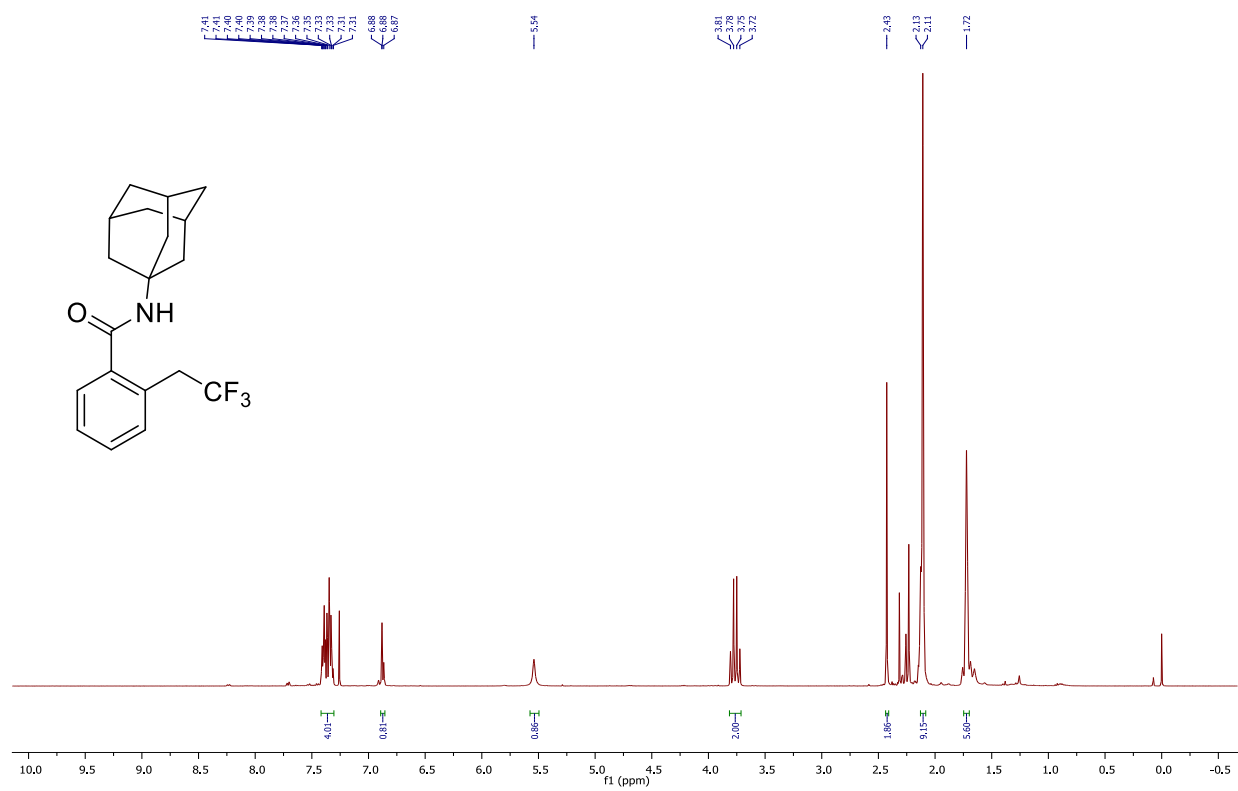

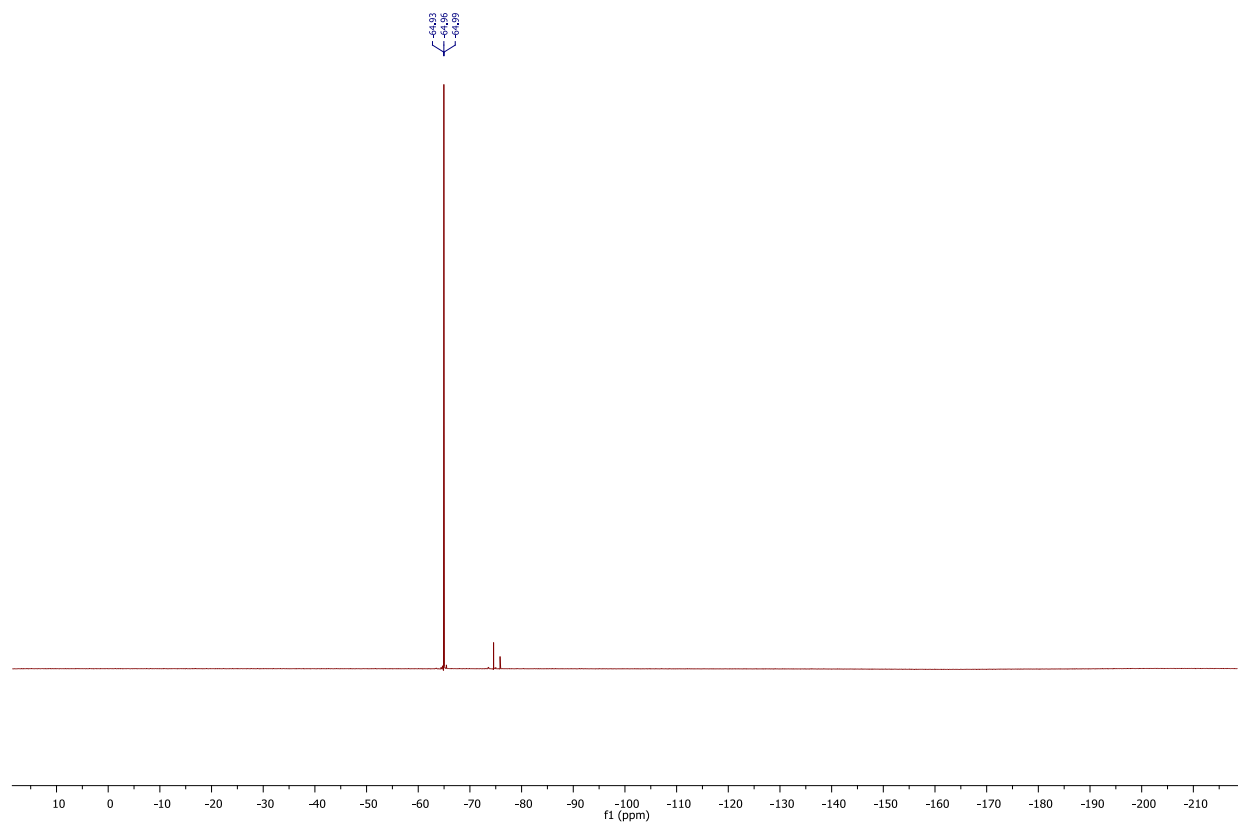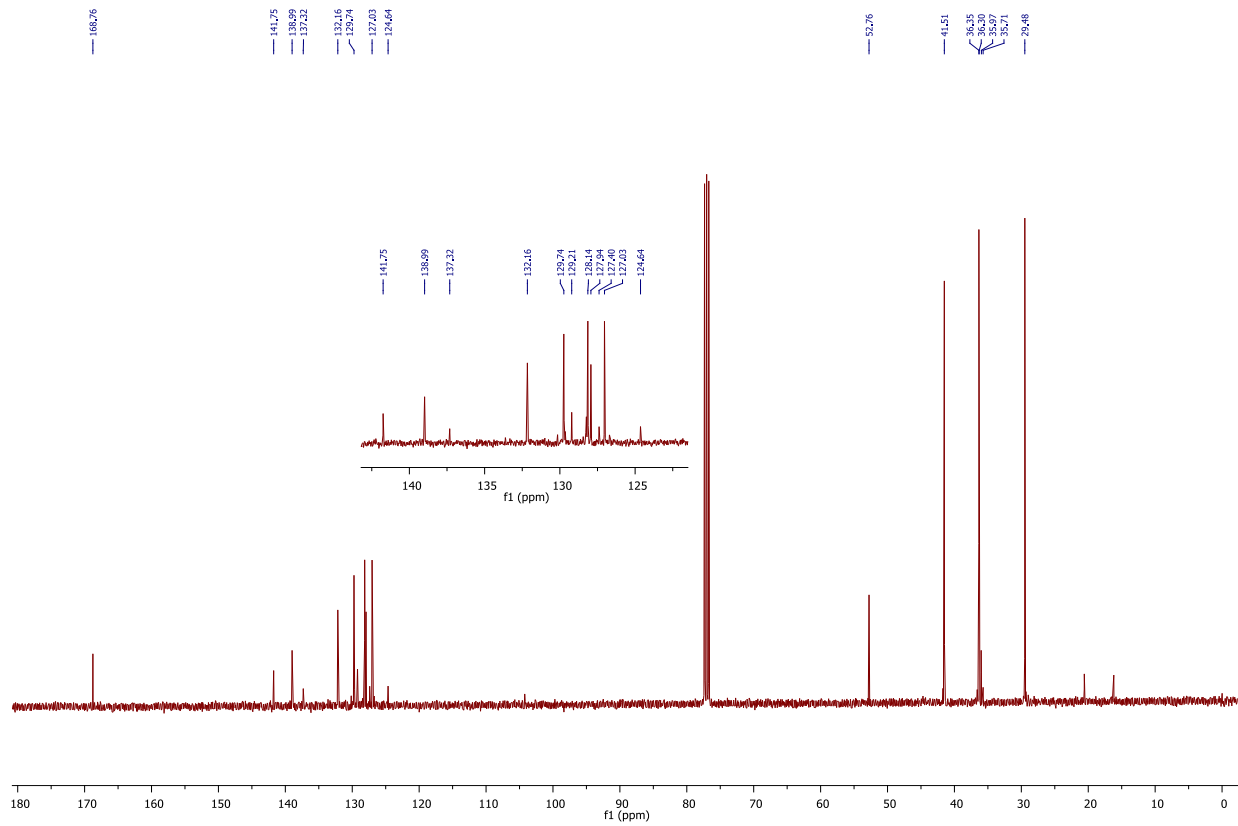

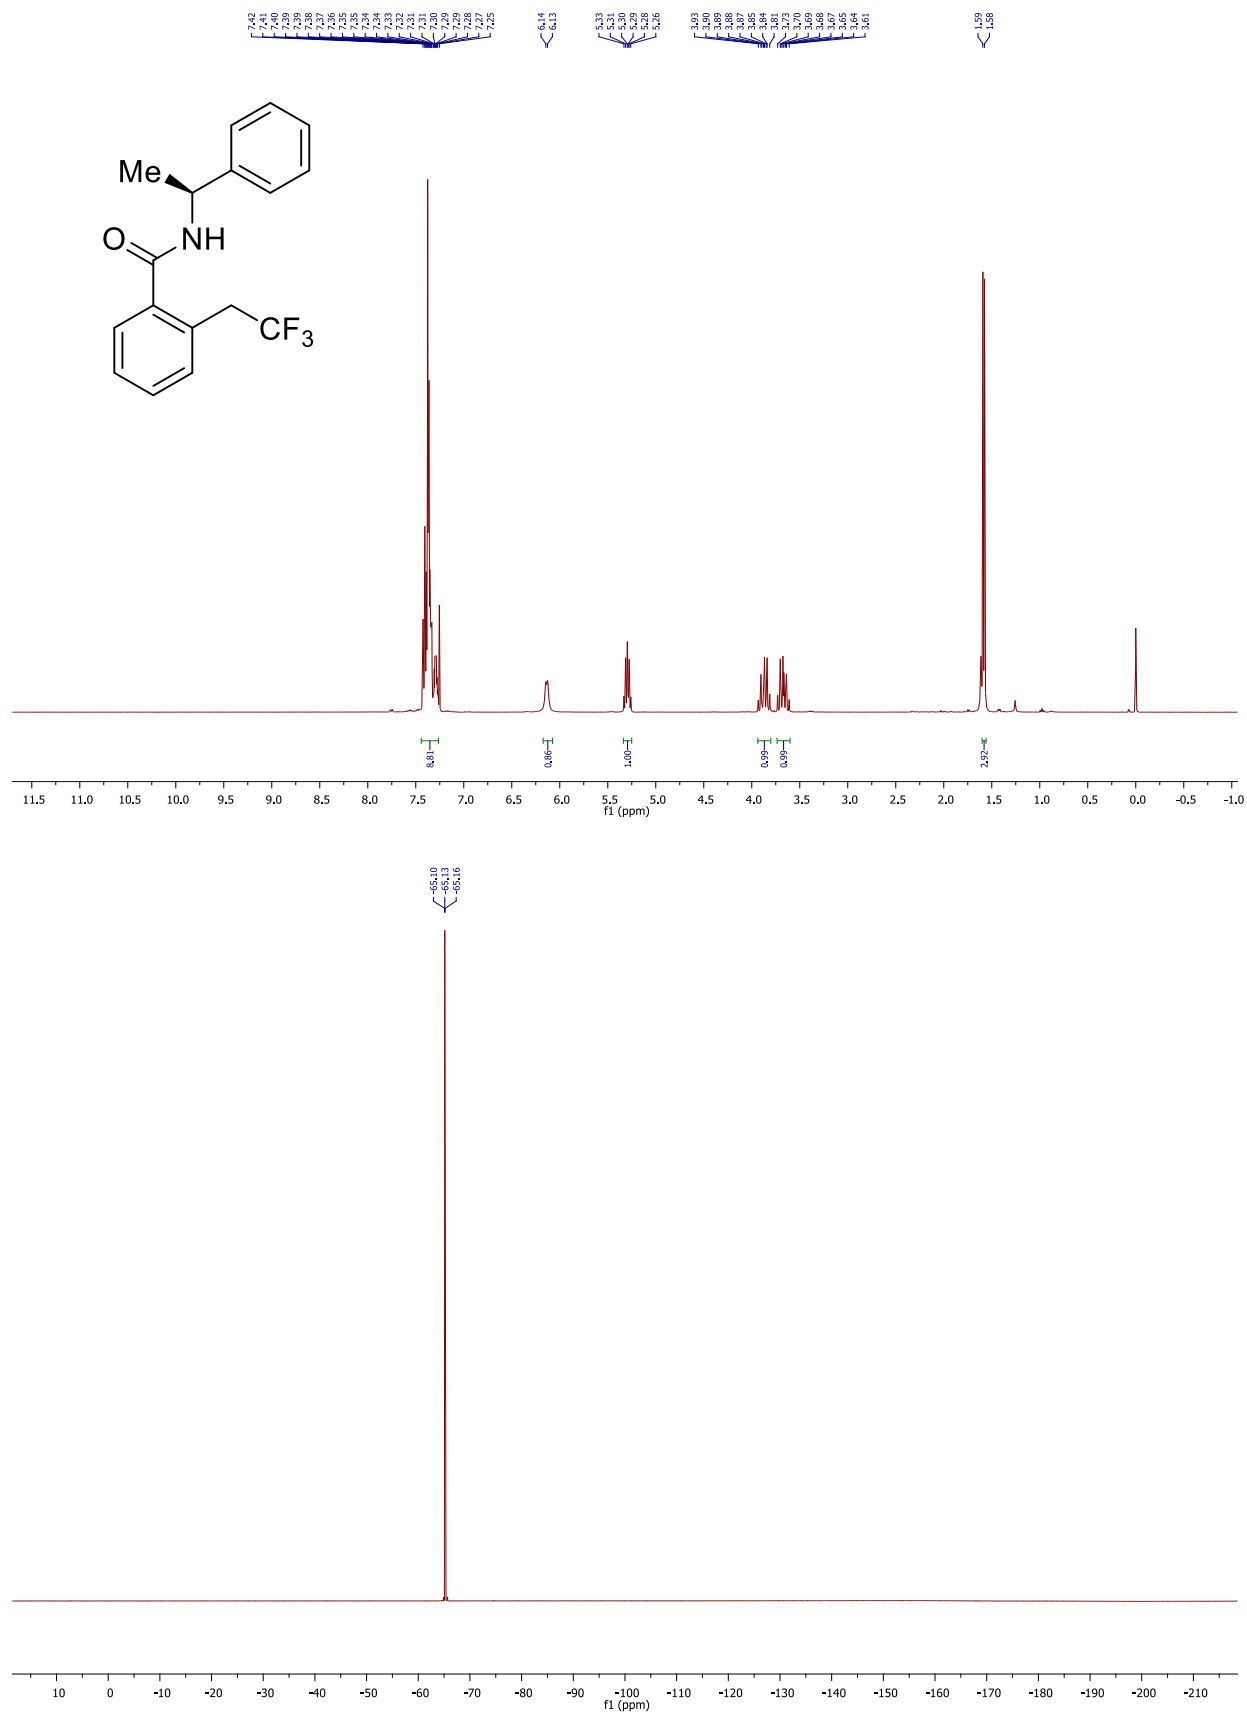

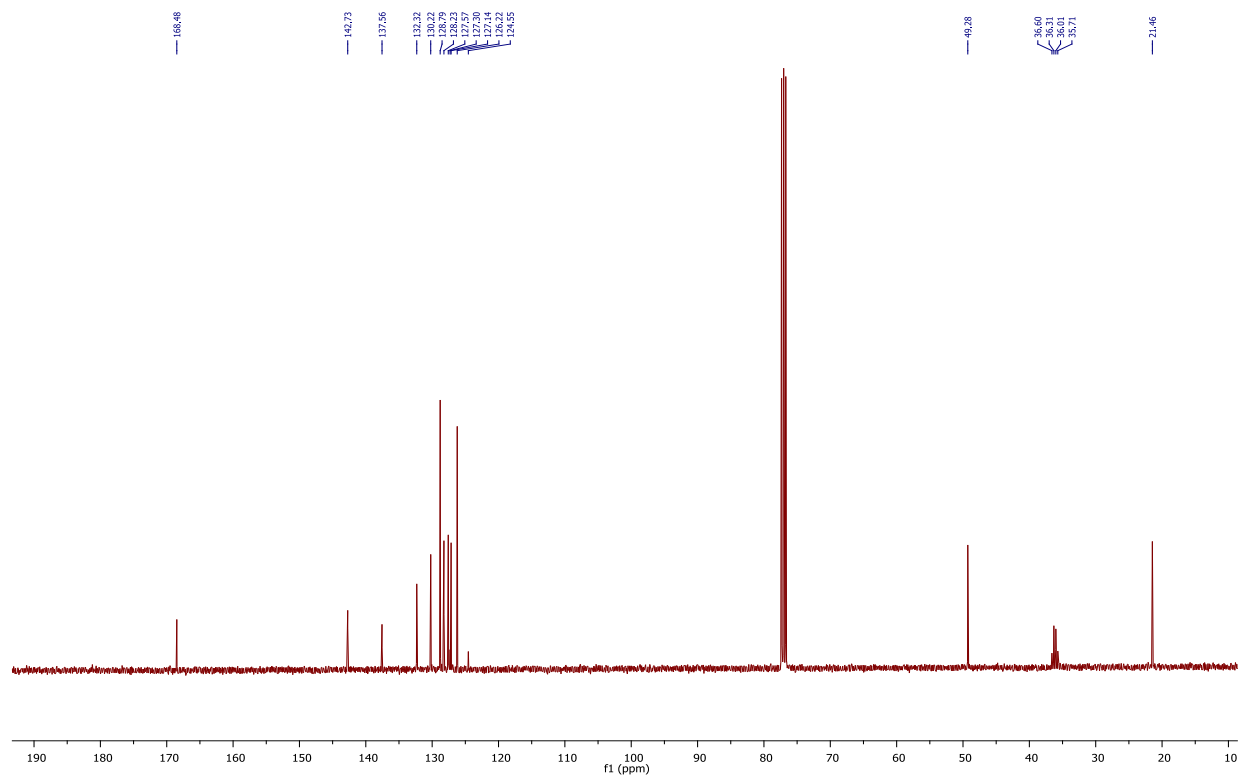

ManiCF3\_MeBenzylamine90% Hex AS-H 1ml\_min 60min 23Mar201

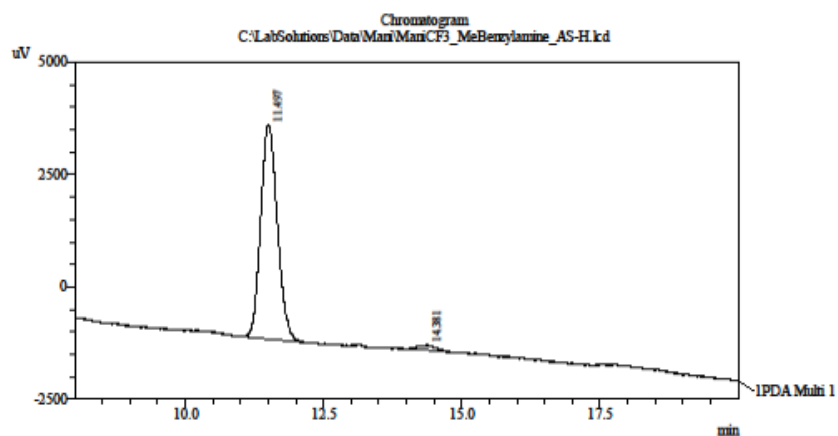

PeakTable

| Peak# | Ret. Time | Area   | Height | Area %  | Height % |
|-------|-----------|--------|--------|---------|----------|
| 1     | 11.497    | 99271  | 4759   | 97.771  | 97.689   |
| 2     | 14.381    | 2263   | 113    | 2.229   | 2.311    |
| Total |           | 101535 | 4872   | 100.000 | 100.000  |

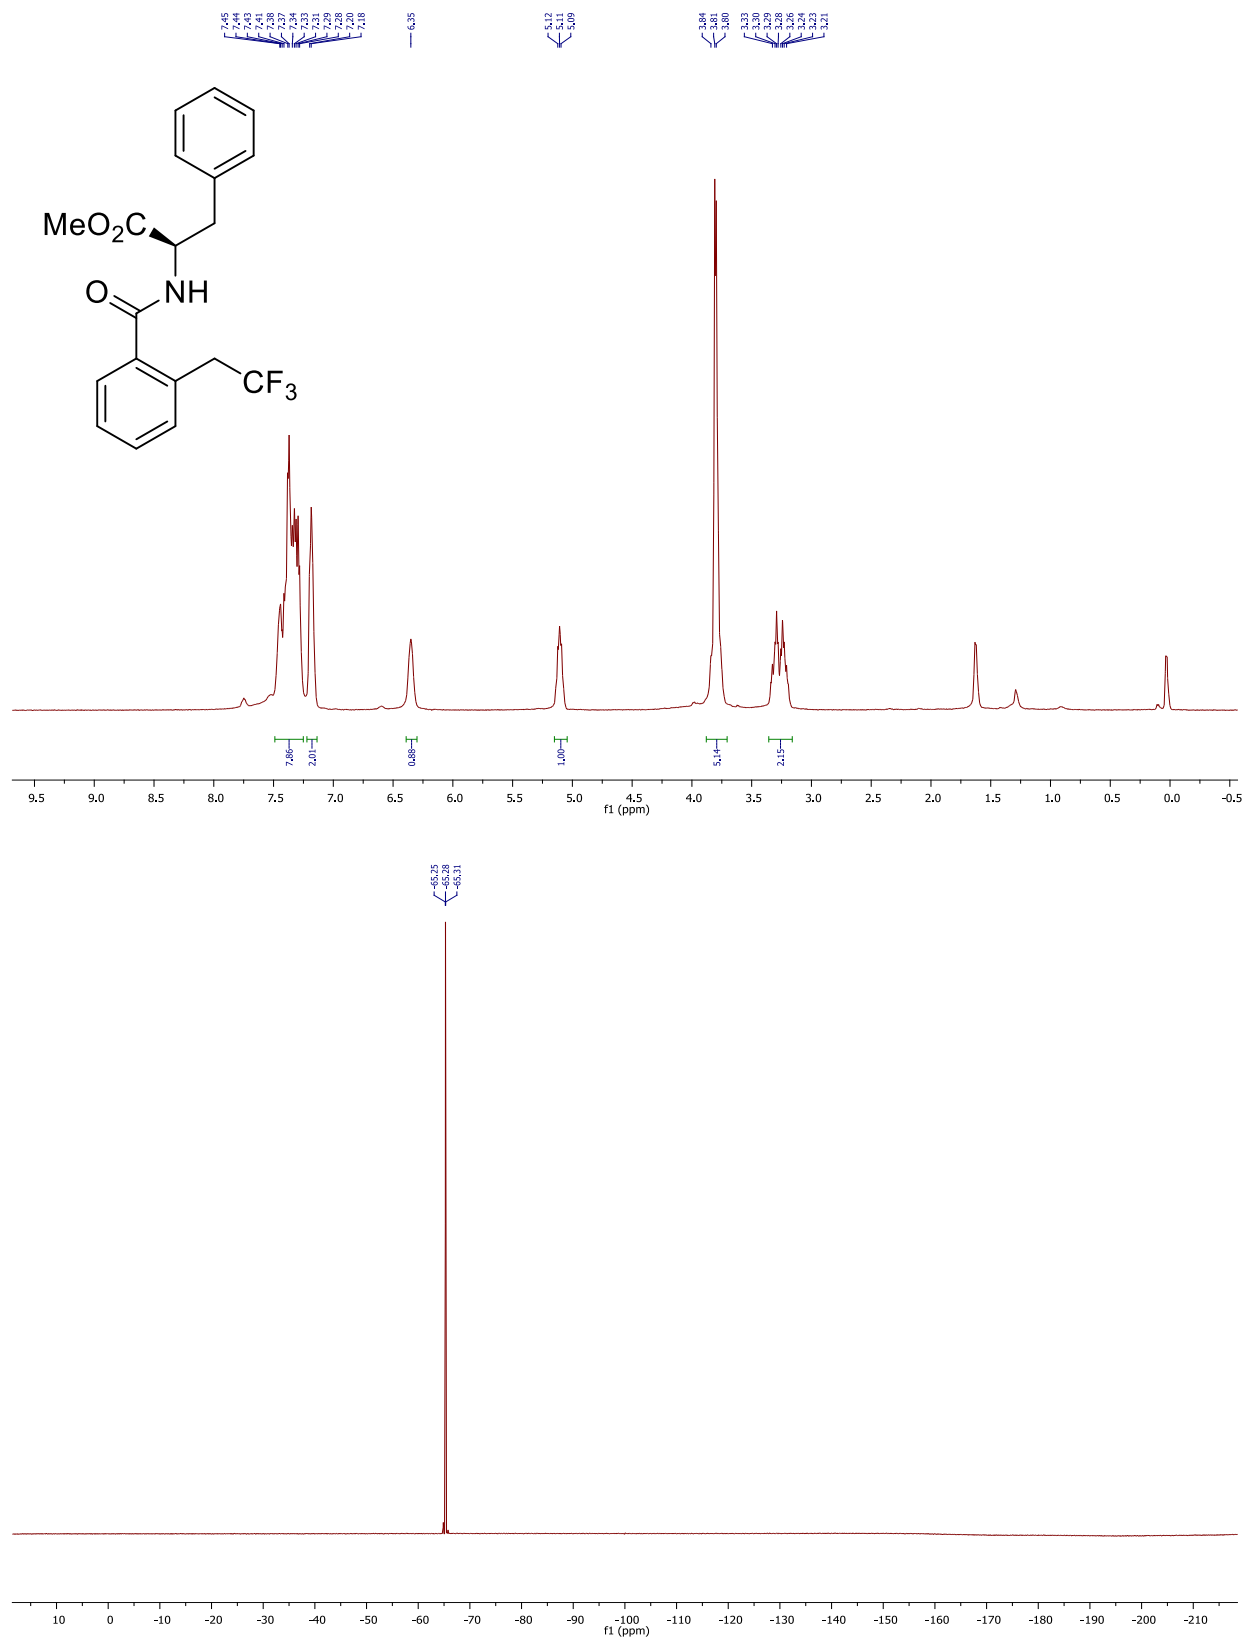

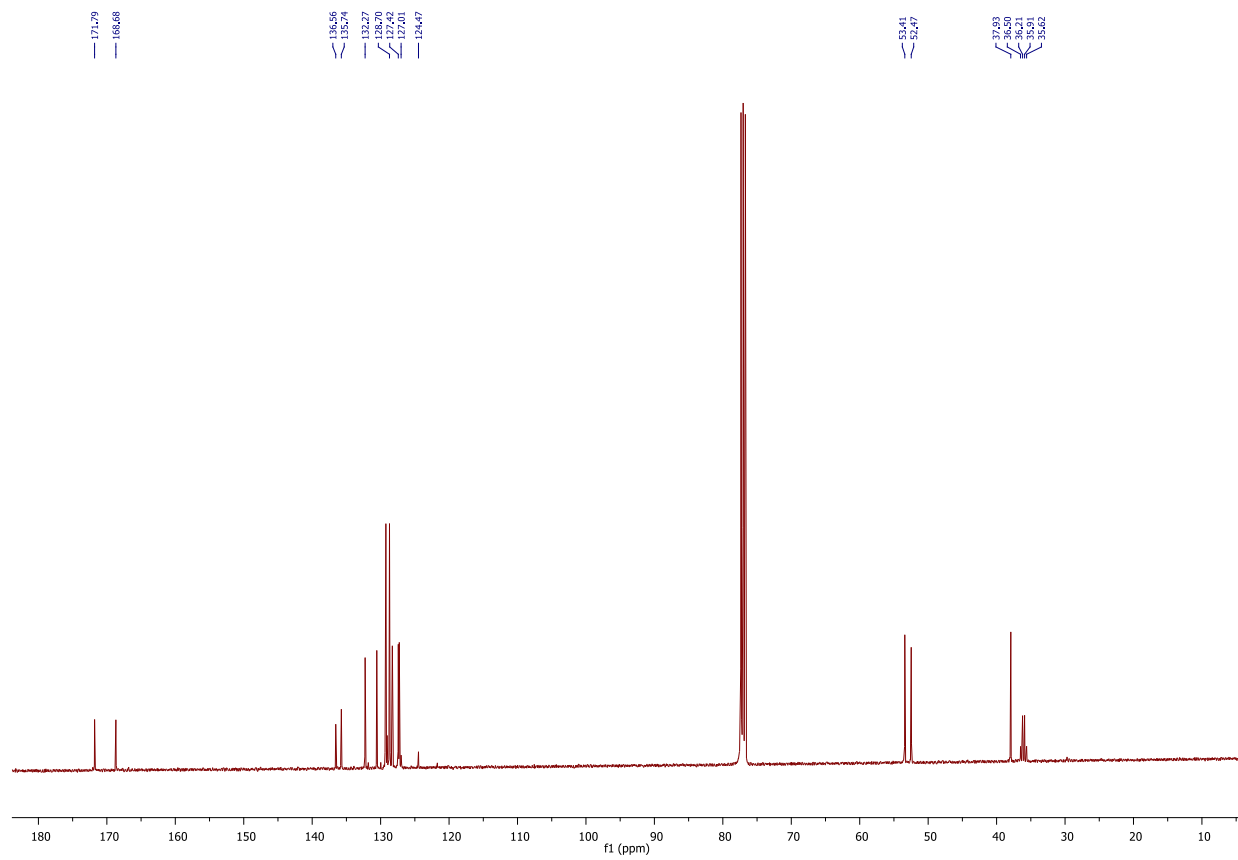



ManiCF3\_NPhalaninate90% Hex AS-H 1ml\_min 30min 23Mar2017

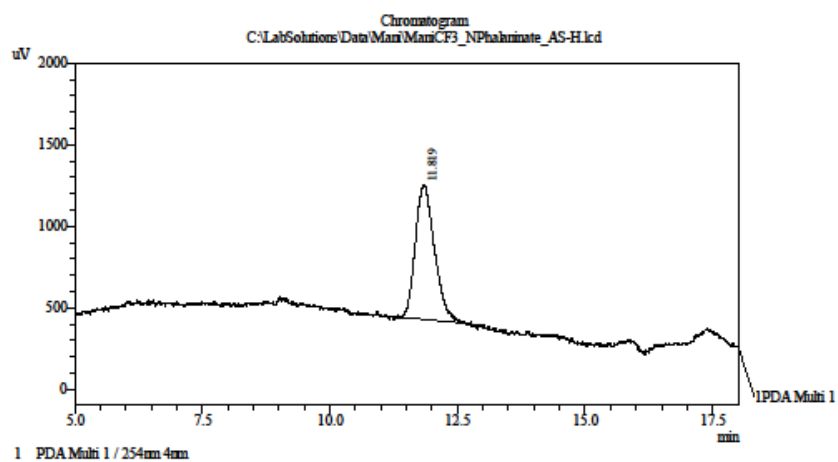

PeakTable

| Peak# | Ret. Time | Area  | Height | Area %  | Height % |
|-------|-----------|-------|--------|---------|----------|
| 1     | 11.819    | 21560 | 829    | 100.000 | 100.000  |
| Total |           | 21560 | 829    | 100.000 | 100.000  |

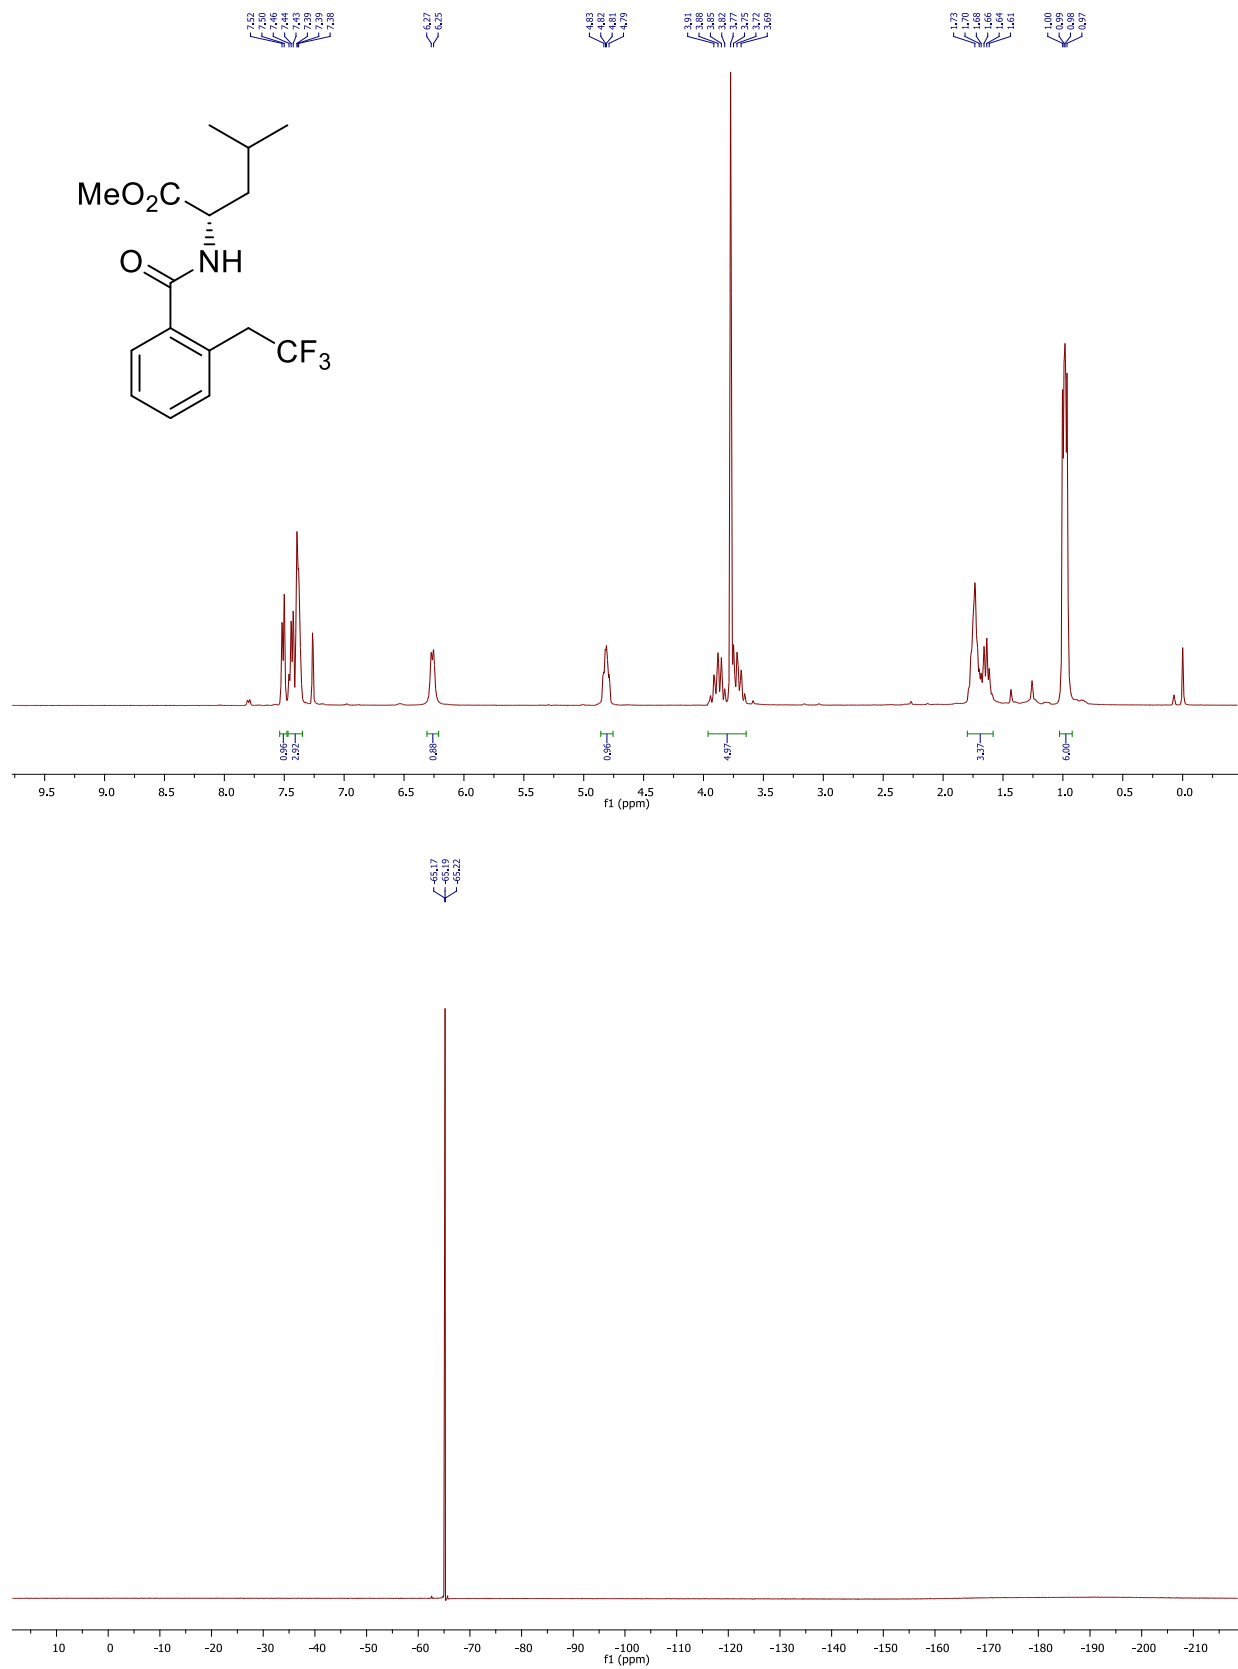

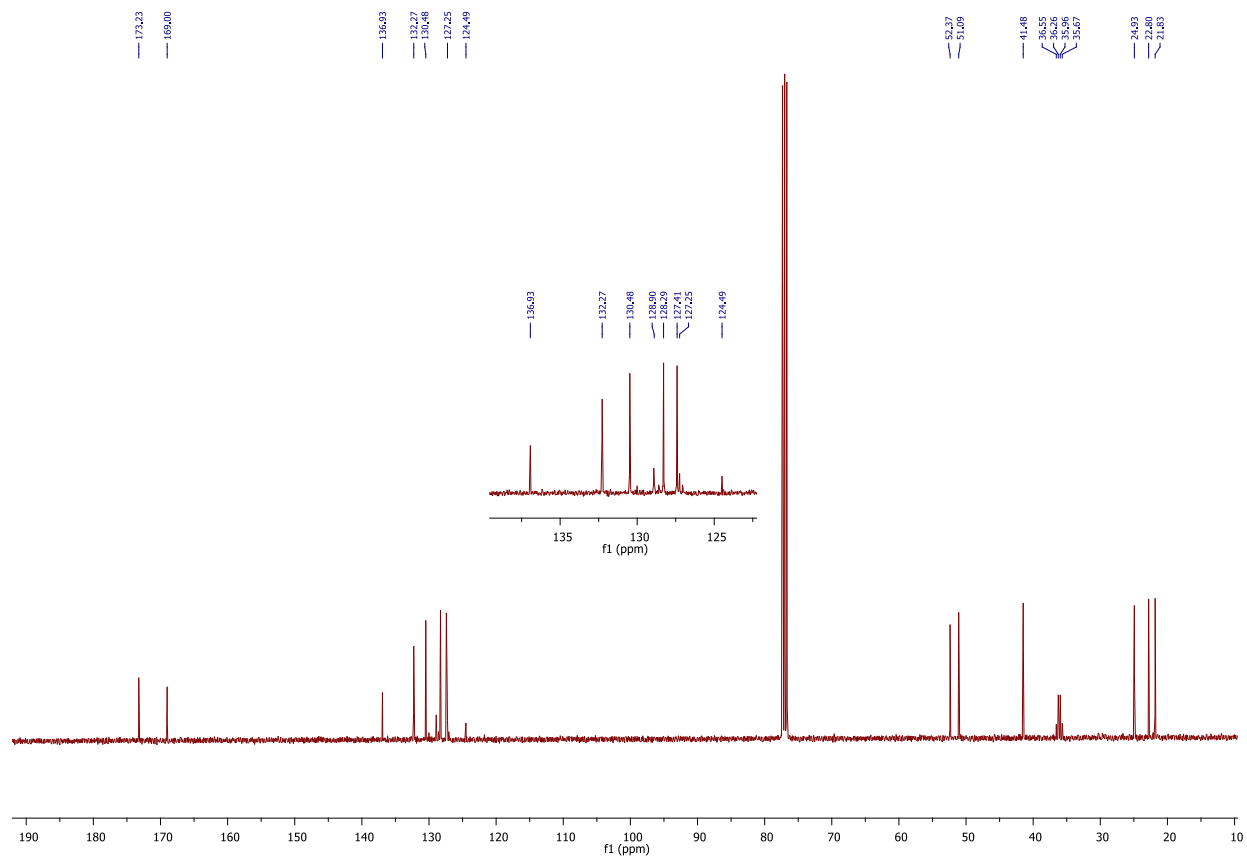

ManiCF3\_NMeLeucinate90% Hex AS-H 1ml\_min 60min 23Mar2017

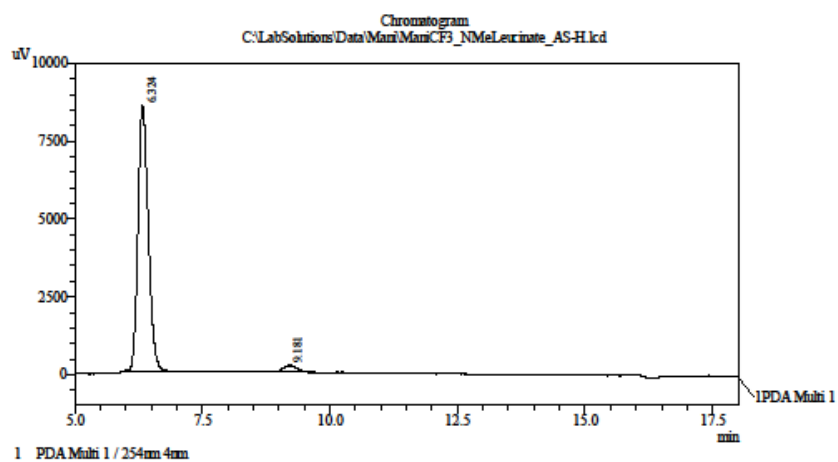

PeakTable

| Peak# | Ret. Time | Area   | Height | Area %  | Height % |
|-------|-----------|--------|--------|---------|----------|
| 1     | 6.324     | 120938 | 8543   | 97.201  | 97.736   |
| 2     | 9.181     | 3483   | 198    | 2.799   | 2.264    |
| Total |           | 124421 | 8741   | 100.000 | 100.000  |

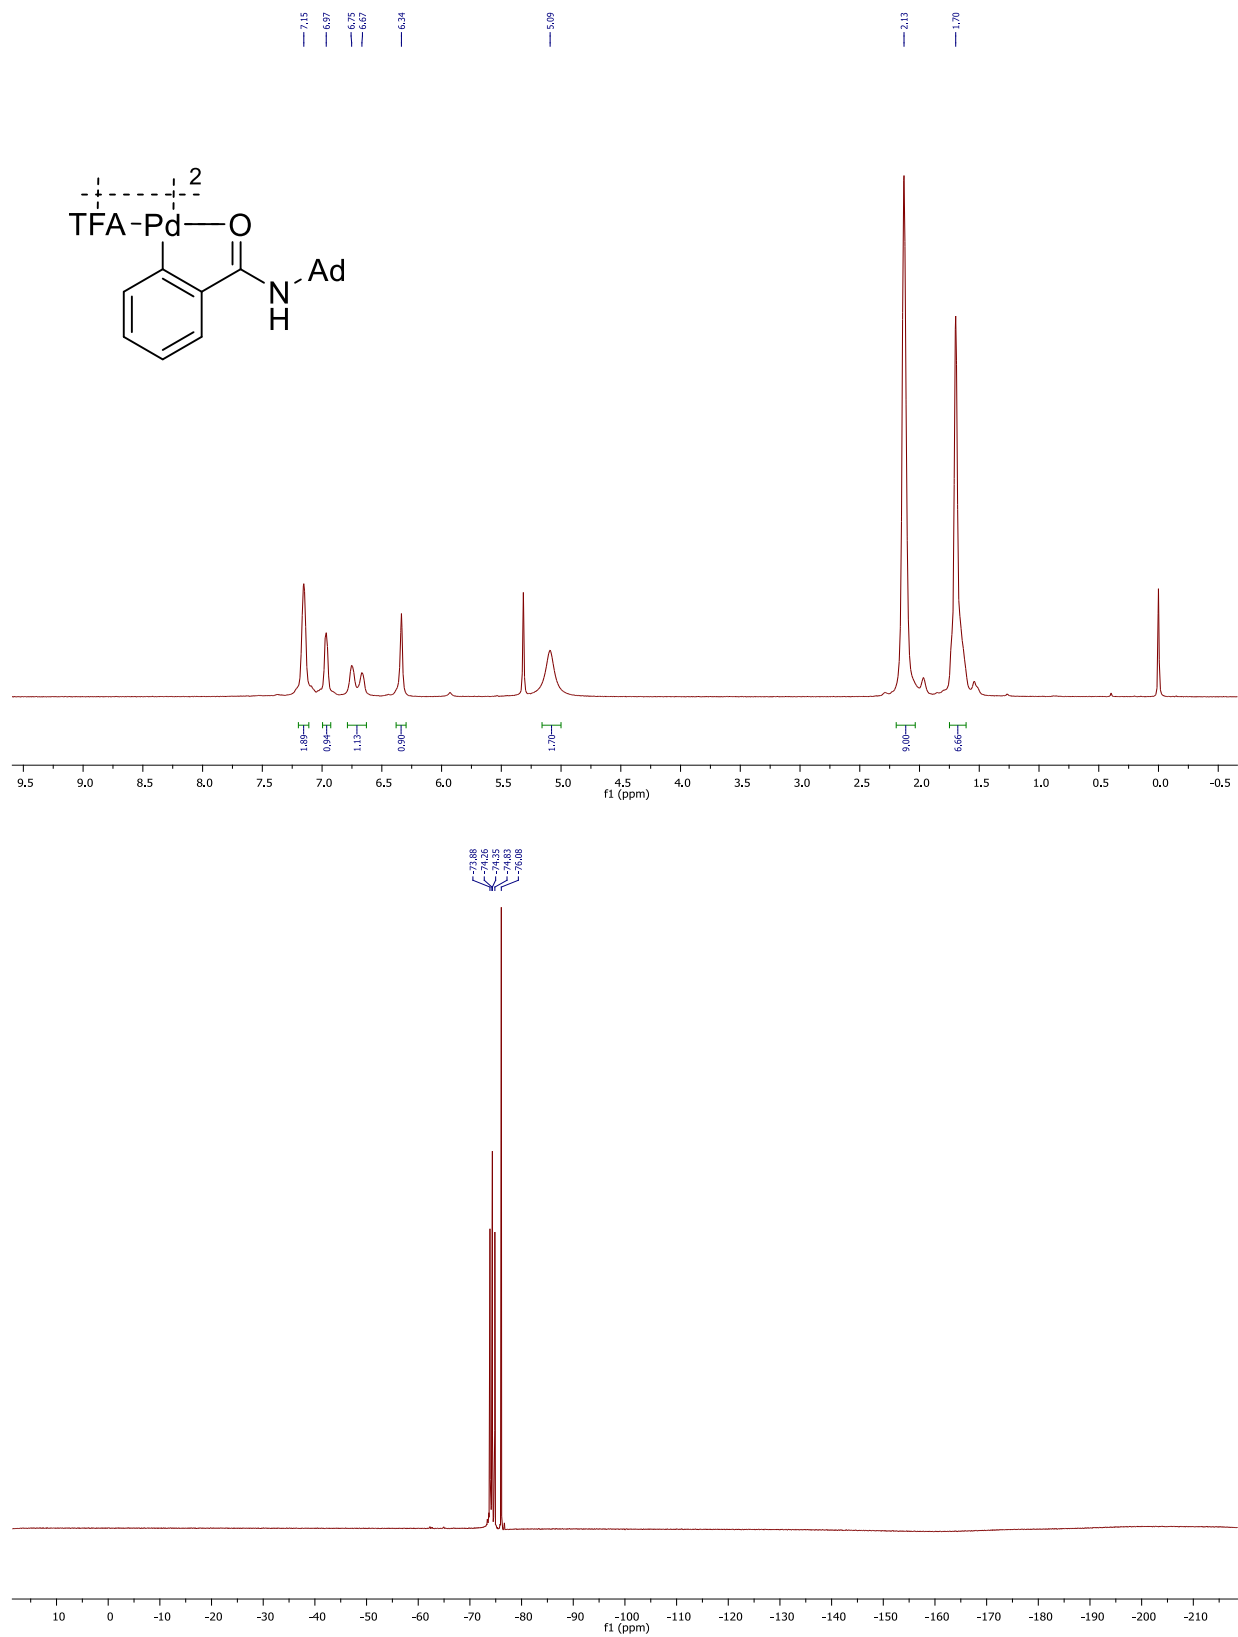

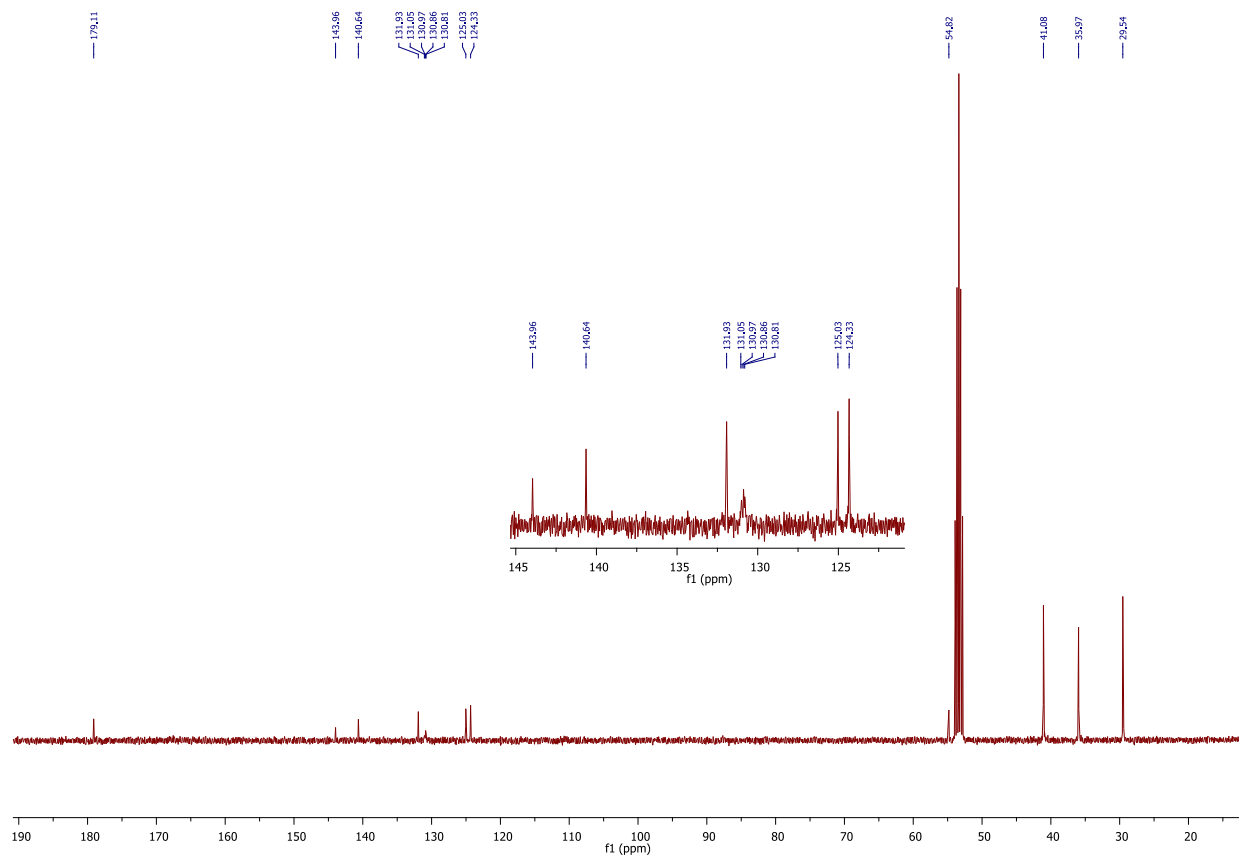

Supplement: Supplementary file 1 [file 9045070]
